# Supplementary material for: Aerodynamic Optimization Design of a Supersonic Compressor Rotor with High Pressure Ratio
Source: Hindawi journal article supplement (doi:10.1155/2021/6664968), 2021-03-10
Supplement: f1 [file 6664968.f1.zip]

Archive with 2 entries (2 files):
- blade data .docx
- Supplementary Description.docx
