# Supplementary material for: Aerodynamic Optimization Design of a Supersonic Compressor Rotor with High Pressure Ratio
Source: Hindawi journal article supplement (doi:10.1155/2021/6664968), 2021-03-10
Supplement: f1 [file 6664968.f1.zip › blade data .docx]

Original rotor

GEOMETRY TURBO

VERSION 5.5

TOLERANCE 1e-006

UNITS Millimeters

UNITS-FACTOR 0.001

NI_BEGIN CHANNEL

NI_BEGIN basic_curve

NAME hub

DISCRETISATION 10

DATA_REDUCTION 0

NI_BEGIN zrcurve

ZR polyline

61

-50 53.9

-47.71561 53.90031

-45.43121 53.90062

-43.14682 53.90092

-40.86243 53.90123

-38.57804 53.90154

-36.294 53.90379

-34.01014 53.907

-31.72628 53.91021

-29.44242 53.91342

-27.15973 53.92262

-24.87783 53.93597

-22.59594 53.94931

-20.31616 53.9735

-18.03892 54.01066

-15.76186 54.04875

-13.4933 54.13031

-11.22597 54.21823

-8.97087 54.36922

-6.724883 54.56771

-4.490868 54.82878

-2.273875 55.17958

-0.075784095 55.63179

2.107303 56.16594

4.2778 56.77041

6.438821 57.42956

8.593251 58.1285

10.74334 58.85529

12.89071 59.60115

15.03626 60.36176

17.18118 61.12989

19.32587 61.90254

21.47054 62.67826

23.61536 63.45613

25.76044 64.23514

27.90571 65.01463

30.05114 65.79447

32.19671 66.57465

34.34226 67.35525

36.48771 68.13633

38.63298 68.91798

40.77785 69.70074

42.92223 70.48467

45.06609 71.2699

47.20932 72.05659

49.35183 72.84492

51.4935 73.63507

53.63438 74.42683

55.77462 75.21958

57.91451 76.01243

60.05453 76.80369

62.19574 77.58956

64.3397 78.3652

66.48862 79.12299

68.64771 79.84467

70.82126 80.51403

73.01443 81.10916

75.23013 81.61211

77.46819 82.11244

79.72631 82.50605

82 83

NI_END zrcurve

NI_END basic_curve

NI_BEGIN basic_curve

NAME shroud

DISCRETISATION 10

DATA_REDUCTION 0

NI_BEGIN zrcurve

ZR polyline

61

-50 114

-47.79776 114

-45.59553 114

-43.39329 114

-41.19106 114

-38.98882 114

-36.78658 114

-34.58435 114

-32.38211 114

-30.17988 114

-27.97764 114

-25.7754 114

-23.57317 114

-21.37093 114

-19.1687 114

-16.96646 114

-14.76423 114

-12.56199 114

-10.35976 114

-8.157521 114

-5.955283 114

-3.753046 114

-1.550811 114

0.6514213 114

2.853657 114

5.055809 113.9975

7.253081 113.8497

9.450353 113.7019

11.64762 113.5541

13.8449 113.4063

16.04217 113.2586

18.23944 113.1108

20.43671 112.963

22.63398 112.8152

24.83126 112.6674

27.02852 112.5196

29.2258 112.3719

31.42307 112.2241

33.62035 112.0763

35.81761 111.9285

38.01489 111.7807

40.21216 111.6329

42.40943 111.4852

44.6067 111.3374

46.80398 111.1896

49.00124 111.0418

51.19851 110.894

53.39579 110.7462

55.59306 110.5984

57.79033 110.4507

59.9876 110.3029

62.18488 110.1551

64.38215 110.0073

66.58435 110.0015

68.78658 110.0003

70.98882 110

73.19106 110

75.3933 110

77.59553 110

79.79777 110

82 110

NI_END zrcurve

NI_END basic_curve

NI_BEGIN channel_curve hub

NAME hub

VERTEX CURVE_P hub 0

VERTEX CURVE_P hub 1

NI_END channel_curve hub

NI_BEGIN channel_curve shroud

NAME shroud

VERTEX CURVE_P shroud 0

VERTEX CURVE_P shroud 1

NI_END channel_curve shroud

NI_BEGIN channel_curve nozzle

NAME nozzle

NI_END channel_curve nozzle

NI_END CHANNEL

NI_BEGIN nirow

NAME row 1

TYPE normal

PERIODICITY 15

ROTATION_SPEED 45000

NI_BEGIN NINonAxiSurfaces hub

NAME non axisymmetric hub

REPETITION 0

NI_END NINonAxiSurfaces hub

NI_BEGIN NINonAxiSurfaces shroud

NAME non axisymmetric shroud

REPETITION 0

NI_END NINonAxiSurfaces shroud

NI_BEGIN NINonAxiSurfaces tip_gap

NAME non axisymmetric tip gap

REPETITION 0

NI_END NINonAxiSurfaces tip_gap

NI_BEGIN NIBlade

NAME Main Blade

NI_BEGIN NITipGap

WIDTH_AT_LEADING_EDGE 0.2

WIDTH_AT_TRAILING_EDGE 0.2

NI_BEGIN NINonAxiSurfaces hub

NAME non axisymmetric hub

REPETITION 0

NI_END NINonAxiSurfaces hub

NI_END NITipGap

NI_BEGIN nibladegeometry

TYPE GEOMTURBO

GEOMETRY_MODIFIED 0

GEOMETRY TURBO VERSION 5

blade_expansion_factor_hub 0.3

blade_expansion_factor_shroud 0.15

intersection_npts 10

intersection_control 1

data_reduction 1

data_reduction_spacing_tolerance 1e-006

data_reduction_angle_tolerance 90

control_points_distribution 0 9 241 9 160 0.00998472303071045 0.0106282877266306

units 1

number_of_blades 15

blade_tangential_definition 0

suction

SECTIONAL

8

# section 1

XYZ

240

49.3306 0.0098132947 -0.179808

49.33059 0.01763659 -0.1798666

49.3306 0.02568111 -0.1793916

49.3306 0.033941723 -0.1783506

49.3306 0.042396963 -0.1767255

49.33061 0.051006861 -0.1742953

49.33059 0.059611741 -0.1707389

49.33073 0.068224289 -0.1664086

49.33126 0.076681755 -0.1611207

49.33284 0.084815443 -0.154877

49.33614 0.092210263 -0.1476045

49.34079 0.099154174 -0.139548

49.34599 0.1054451 -0.1305517

49.35186 0.1109767 -0.1205678

49.35831 0.1155717 -0.1095891

49.36446 0.1190183 -0.09761937

49.37156 0.1210976 -0.084671244

49.37888 0.1216193 -0.07071612

49.38604 0.1203912 -0.055764034

49.39308 0.1166411 -0.040545754

49.39924 0.1081896 -0.027300393

49.40515 0.095865503 -0.015934383

49.41129 0.082948096 -0.0040155225

49.41772 0.069404021 0.0084931413

49.42417 0.055195007 0.021624822

49.43141 0.040277697 0.035412084

49.4387 0.024622308 0.049909055

49.44634 0.0081769377 0.065146469

49.45479 -0.0091094943 0.081166282

49.46339 -0.027270429 0.098034136

49.47235 -0.046368524 0.1157858

49.48176 -0.06646347 0.1344675

49.49207 -0.087595664 0.1541595

49.50237 -0.1098386 0.1749068

49.51343 -0.1332619 0.1967603

49.52521 -0.1579148 0.2198201

49.53778 -0.1838828 0.2441295

49.55025 -0.2112431 0.2697673

49.56379 -0.240064 0.2968291

49.57846 -0.2704482 0.325374

49.59381 -0.3024597 0.3555248

49.60942 -0.3362202 0.3873346

49.62649 -0.3717984 0.4209532

49.64414 -0.4093328 0.4564282

49.66285 -0.4488922 0.4939363

49.68251 -0.4906382 0.5335342

49.70311 -0.5346516 0.5754046

49.72538 -0.5810921 0.6196117

49.74826 -0.6300683 0.6663659

49.77274 -0.6817482 0.715754

49.79856 -0.7362599 0.7679768

49.82541 -0.7937791 0.8231687

49.85403 -0.8544689 0.8814932

49.88422 -0.9184772 0.9431908

49.91587 -0.9860241 1.008376

49.94967 -1.057285 1.077295

49.98459 -1.13245 1.150168

50.02164 -1.211741 1.227179

50.06109 -1.295387 1.308584

50.10213 -1.383619 1.394599

50.14526 -1.476656 1.485566

50.19086 -1.57478 1.581639

50.23897 -1.678247 1.683169

50.28949 -1.787337 1.790433

50.34267 -1.902339 1.903728

50.3982 -2.023538 2.023371

50.45659 -2.151286 2.149734

50.51815 -2.285877 2.283153

50.58258 -2.427691 2.42396

50.65011 -2.57706 2.572509

50.7207 -2.734371 2.72923

50.79526 -2.899966 2.89451

50.87273 -3.074258 3.068773

50.95392 -3.257688 3.252429

51.03865 -3.450647 3.445893

51.12741 -3.65356 3.649657

51.21983 -3.866908 3.864149

51.31615 -4.091155 4.089839

51.41655 -4.326755 4.327196

51.52107 -4.57419 4.576698

51.62959 -4.833917 4.838831

51.74232 -5.10649 5.114053

51.85905 -5.392429 5.402928

51.98034 -5.692099 5.705828

52.10518 -6.006172 6.023267

52.23427 -6.335107 6.35579

52.36731 -6.679392 6.703729

52.50452 -7.039461 7.067595

52.64536 -7.415552 7.448213

52.79017 -7.808077 7.846128

52.93874 -8.217134 8.261709

53.09113 -8.643168 8.695375

53.2468 -9.086466 9.147716

53.40593 -9.547217 9.619149

53.56783 -10.02572 10.10993

53.73268 -10.52194 10.6204

53.90033 -11.03613 11.15092

54.06999 -11.56828 11.70173

54.24174 -12.11815 12.2731

54.415 -12.68585 12.86488

54.58932 -13.27111 13.47742

54.76453 -13.87364 14.11056

54.93999 -14.49308 14.7643

55.11573 -15.12889 15.4386

55.29081 -15.78062 16.13316

55.46509 -16.44762 16.84747

55.63857 -17.12931 17.58126

55.81078 -17.82476 18.33378

55.98021 -18.53277 19.10503

56.14743 -19.25281 19.89411

56.31164 -19.98373 20.70014

56.47275 -20.72419 21.5219

56.63072 -21.47351 22.35898

56.78461 -22.2295 23.20987

56.93485 -22.99168 24.07364

57.08075 -23.75839 24.94931

57.22252 -24.52813 25.83499

57.35945 -25.29977 26.72977

57.49181 -26.07166 27.632

57.61978 -26.8424 28.54019

57.74277 -27.61072 29.45305

57.86114 -28.37501 30.36878

57.97463 -29.13427 31.28618

58.08325 -29.88673 32.20345

58.18651 -30.63111 33.1186

58.28526 -31.36776 34.02927

58.38004 -32.09554 34.93326

58.46882 -32.81385 35.82967

58.55239 -33.52231 36.71492

58.62899 -34.21856 37.58899

58.69942 -34.90456 38.44897

58.76529 -35.57804 39.29404

58.82544 -36.23801 40.12346

58.88087 -36.88457 40.93685

58.93127 -37.51586 41.7327

58.97752 -38.13196 42.51074

59.01963 -38.73194 43.27034

59.05848 -39.31537 44.01153

59.09411 -39.88131 44.7336

59.12643 -40.42997 45.43631

59.15731 -40.9607 46.11922

59.18525 -41.47362 46.7823

59.21149 -41.96862 47.42525

59.23656 -42.44601 48.04848

59.25962 -42.90523 48.65173

59.28178 -43.34683 49.23471

59.30302 -43.77131 49.79819

59.32354 -44.17805 50.34202

59.34332 -44.5682 50.86573

59.36231 -44.94137 51.37085

59.38132 -45.29881 51.85638

59.39957 -45.64011 52.3239

59.41747 -45.96613 52.77267

59.43497 -46.27724 53.20347

59.45249 -46.57441 53.61684

59.46944 -46.85689 54.01311

59.48638 -47.12614 54.39268

59.50309 -47.38232 54.75569

59.51957 -47.62617 55.10307

59.53554 -47.85775 55.43554

59.55161 -48.07824 55.7529

59.56726 -48.28753 56.05578

59.58231 -48.4859 56.3451

59.59734 -48.67443 56.62079

59.61253 -48.85297 56.8839

59.62685 -49.0226 57.13452

59.64081 -49.18375 57.37322

59.65479 -49.3361 57.60049

59.66802 -49.4803 57.81634

59.68138 -49.61743 58.02214

59.69419 -49.74686 58.21773

59.7066 -49.86914 58.40344

59.71852 -49.98563 58.58018

59.73005 -50.09549 58.74799

59.74125 -50.19941 58.9074

59.75217 -50.29781 59.05888

59.76271 -50.39133 59.20231

59.77285 -50.47926 59.33849

59.78267 -50.56274 59.46813

59.79198 -50.6419 59.59093

59.80071 -50.71637 59.70716

59.80965 -50.78701 59.81749

59.81783 -50.85398 59.92197

59.82555 -50.91702 60.02167

59.83338 -50.97709 60.11539

59.84073 -51.03343 60.20442

59.84753 -51.08697 60.28918

59.85442 -51.13765 60.36917

59.86079 -51.18539 60.44499

59.86679 -51.231 60.51723

59.87289 -51.27383 60.58519

59.87848 -51.31429 60.65004

59.88419 -51.35215 60.71152

59.88962 -51.38837 60.76957

59.89498 -51.42229 60.82506

59.89951 -51.45458 60.87705

59.90453 -51.48496 60.92681

59.90909 -51.51342 60.97416

59.91388 -51.54055 61.0187

59.91787 -51.56598 61.06102

59.92116 -51.59077 61.10056

59.92377 -51.61462 61.13734

59.92635 -51.63717 61.17258

59.92798 -51.65857 61.20456

59.92911 -51.6794 61.23525

59.92924 -51.69973 61.26331

59.9286 -51.71947 61.28925

59.92711 -51.7386 61.31316

59.95905 -51.73497 61.36496

59.94722 -51.757 61.3399

59.93593 -51.7725 61.3592

59.92492 -51.7923 61.3794

59.91396 -51.8102 61.3946

59.90375 -51.8263 61.4068

59.89383 -51.8439 61.4178

59.88398 -51.87885 61.43555

59.87441 -51.89511 61.44313

59.86538 -51.91081 61.45004

59.85621 -51.92532 61.45632

59.84732 -51.93937 61.46227

59.83896 -51.95277 61.46749

59.83088 -51.96555 61.47244

59.82285 -51.97752 61.47676

59.81509 -51.98939 61.48067

59.80784 -51.99979 61.48447

59.80062 -52.01047 61.48769

59.79367 -52.02043 61.49065

59.78648 -52.03038 61.49356

59.78001 -52.03952 61.49623

59.77375 -52.04847 61.49846

59.7675 -52.05684 61.50071

59.76145 -52.06486 61.50232

59.75537 -52.07278 61.50422

59.74995 -52.08017 61.50574

59.74428 -52.08751 61.50735

59.73921 -52.09455 61.50861

59.73364 -52.10137 61.50975

59.72892 -52.10748 61.51102

59.7239 -52.11382 61.51197

59.71925 -52.11993 61.51283

# section 2

XYZ

240

56.3868 -0.047023728 -0.080230385

56.38681 -0.038941558 -0.079888582

56.38682 -0.030650834 -0.079004228

56.38681 -0.022163918 -0.077531435

56.38682 -0.01351415 -0.075433709

56.38682 -0.0047586421 -0.072481588

56.38681 0.0039017336 -0.068329275

56.38695 0.012494344 -0.063348815

56.38746 0.020832352 -0.05734935

56.38877 0.028736919 -0.050333541

56.39177 0.035775565 -0.04222367

56.39564 0.042214353 -0.033287767

56.40024 0.0478024 -0.023398416

56.40527 0.05239236 -0.012548762

56.41068 0.055788737 -0.00078263757

56.41644 0.057775162 0.011829292

56.42247 0.058121696 0.02518495

56.4287 0.056602105 0.039161317

56.43501 0.05301661 0.053594667

56.44118 0.046889994 0.067953192

56.44677 0.036768232 0.080733791

56.45184 0.023401078 0.092122413

56.45715 0.0093892328 0.1040649

56.46274 -0.0053037093 0.1165968

56.46857 -0.020719249 0.129752

56.47471 -0.036902968 0.1435635

56.48116 -0.053891692 0.1580832

56.48792 -0.071738556 0.1733453

56.49504 -0.090498716 0.1893874

56.50251 -0.1102127 0.2062759

56.51035 -0.1309452 0.2240484

56.51862 -0.1527611 0.2427501

56.52733 -0.1757084 0.2624594

56.53646 -0.1998639 0.2832212

56.5461 -0.2253022 0.3050914

56.55624 -0.2520832 0.3281586

56.56691 -0.2802958 0.3524781

56.57816 -0.3100246 0.3781207

56.58999 -0.341347 0.4051824

56.60249 -0.374369 0.4337252

56.61563 -0.4091705 0.4638649

56.62949 -0.4458747 0.4956635

56.64409 -0.4845669 0.5292562

56.65948 -0.5253863 0.5647084

56.6757 -0.5684268 0.6021737

56.69282 -0.6138428 0.6417239

56.71083 -0.6617401 0.6835291

56.72984 -0.7122877 0.7276742

56.74986 -0.7656069 0.7743407

56.77097 -0.8218787 0.8236324

56.7932 -0.8812457 0.8757407

56.81664 -0.9438999 0.9307942

56.84135 -1.010018 0.9889728

56.86734 -1.079772 1.050487

56.89477 -1.15339 1.115479

56.92363 -1.231073 1.184164

56.95398 -1.313026 1.256782

56.98598 -1.399505 1.333504

57.01965 -1.490745 1.414579

57.05505 -1.586998 1.500249

57.09227 -1.688521 1.590799

57.13142 -1.795611 1.68644

57.17257 -1.908552 1.787473

57.21581 -2.027649 1.894187

57.26121 -2.153218 2.006887

57.30884 -2.285593 2.125888

57.35883 -2.425116 2.251518

57.41119 -2.572146 2.384149

57.46609 -2.727065 2.524085

57.52356 -2.890256 2.67172

57.58372 -3.062126 2.827413

57.6466 -3.243081 2.991606

57.7123 -3.433553 3.16468

57.78088 -3.63399 3.34706

57.85244 -3.844848 3.539174

57.92695 -4.066598 3.74147

58.00451 -4.299729 3.954404

58.08517 -4.544727 4.178432

58.16901 -4.802092 4.414008

58.25593 -5.072344 4.661654

58.34598 -5.355999 4.921827

58.43913 -5.653591 5.195014

58.53542 -5.965644 5.481694

58.63467 -6.292696 5.782382

58.73702 -6.635256 6.09751

58.84206 -6.993898 6.427625

58.94988 -7.36911 6.773146

59.0605 -7.761338 7.134556

59.17333 -8.170902 7.512619

59.28849 -8.598087 7.907882

59.40601 -9.04325 8.320769

59.52566 -9.506719 8.75176

59.64714 -9.988786 9.201299

59.77019 -10.4897 9.669805

59.89454 -11.00964 10.15765

60.01988 -11.54875 10.66517

60.14587 -12.10709 11.19268

60.27214 -12.68468 11.74042

60.39832 -13.28143 12.3086

60.52399 -13.89719 12.89734

60.64877 -14.53172 13.50674

60.77221 -15.18472 14.13679

60.8939 -15.85574 14.78743

61.01338 -16.5443 15.45852

61.13023 -17.24978 16.14982

61.244 -17.97149 16.86103

61.35427 -18.70863 17.59174

61.46127 -19.46048 18.34117

61.56322 -20.22571 19.10933

61.66048 -21.0034 19.89522

61.7527 -21.79241 20.69807

61.83961 -22.5915 21.51699

61.92091 -23.39938 22.35101

61.99638 -24.21466 23.19908

62.06579 -25.03593 24.06004

62.12907 -25.8617 24.93266

62.18607 -26.6905 25.81566

62.23676 -27.52079 26.70766

62.28118 -28.35103 27.60721

62.31934 -29.17971 28.51286

62.35137 -30.00529 29.42307

62.3774 -30.82627 30.33627

62.39761 -31.64124 31.25092

62.4116 -32.44842 32.16569

62.41943 -33.24663 33.07883

62.42245 -34.03565 33.98778

62.42155 -34.8149 34.89035

62.41513 -35.58253 35.78571

62.40456 -36.33828 36.67152

62.38746 -37.07955 37.54779

62.36602 -37.80676 38.412

62.34069 -38.51884 39.26322

62.31205 -39.21518 40.10016

62.27963 -39.89481 40.92202

62.24436 -40.55741 41.72767

62.20667 -41.20239 42.51634

62.167 -41.82926 43.28738

62.12556 -42.43739 44.04034

62.0831 -43.0268 44.77447

62.03974 -43.59703 45.48952

61.99601 -44.14816 46.18502

61.95223 -44.68009 46.86069

61.9085 -45.19273 47.51647

61.86534 -45.68639 48.15204

61.8228 -46.16119 48.76736

61.78114 -46.61712 49.36259

61.74053 -47.05482 49.93759

61.70112 -47.47437 50.49266

61.66301 -47.87633 51.02776

61.62626 -48.26093 51.5433

61.59101 -48.62875 52.0394

61.55721 -48.98011 52.5165

61.52499 -49.31565 52.97478

61.49429 -49.63567 53.41479

61.4651 -49.9408 53.83683

61.43749 -50.2316 54.24124

61.41136 -50.50842 54.62867

61.38666 -50.77187 54.99945

61.36341 -51.02248 55.35408

61.34155 -51.26073 55.69303

61.32098 -51.48715 56.01682

61.30165 -51.7023 56.32585

61.2836 -51.90652 56.62079

61.26669 -52.10035 56.90205

61.25089 -52.28417 57.1702

61.23608 -52.45861 57.4256

61.22228 -52.62402 57.6688

61.20942 -52.78083 57.90029

61.19741 -52.92946 58.12054

61.18619 -53.07029 58.33002

61.17579 -53.20362 58.52925

61.16608 -53.32996 58.71856

61.15702 -53.44963 58.8984

61.14863 -53.56284 59.06928

61.1408 -53.6701 59.23151

61.13353 -53.77157 59.38554

61.12674 -53.86765 59.53172

61.12038 -53.95861 59.67039

61.11453 -54.04459 59.80204

61.10901 -54.12605 59.92684

61.10395 -54.20302 60.04527

61.09923 -54.27587 60.15754

61.0948 -54.34484 60.26395

61.09069 -54.41005 60.36487

61.08681 -54.47182 60.46048

61.08327 -54.53017 60.55116

61.07994 -54.58538 60.63709

61.07679 -54.6377 60.71848

61.07393 -54.68712 60.79567

61.07121 -54.73389 60.86882

61.06869 -54.77815 60.93812

61.06641 -54.81999 61.00383

61.06434 -54.85952 61.06617

61.06247 -54.89685 61.12528

61.06083 -54.93212 61.18137

61.05891 -54.9658 61.23419

61.05751 -54.99732 61.28451

61.05616 -55.02718 61.33218

61.05485 -55.05544 61.37727

61.05351 -55.08228 61.4199

61.05173 -55.10815 61.45998

61.04982 -55.13264 61.49755

61.04765 -55.15603 61.53286

61.04507 -55.17851 61.56584

61.04203 -55.20018 61.59661

61.03852 -55.22112 61.62522

61.03452 -55.24138 61.65172

61.02995 -55.26106 61.6762

61.05318 -55.2783 61.7021

61.04053 -55.2945 61.7223

61.02815 -55.313 61.7424

61.01601 -55.3304 61.7578

61.00417 -55.3503 61.7728

60.99259 -55.368 61.7843

60.98131 -55.38535 61.79436

60.97032 -55.40241 61.80271

60.95963 -55.41866 61.81031

60.94923 -55.43414 61.81723

60.93918 -55.44888 61.82352

60.9294 -55.46294 61.82923

60.91993 -55.47634 61.83443

60.91076 -55.48915 61.83913

60.90187 -55.50137 61.84343

60.89327 -55.51305 61.84731

60.88496 -55.52421 61.85086

60.87691 -55.53488 61.85407

60.86912 -55.54507 61.857

60.86159 -55.55486 61.85966

60.85429 -55.56423 61.86209

60.84724 -55.57322 61.86429

60.84041 -55.58183 61.86629

60.8338 -55.5901 61.86811

60.8274 -55.59805 61.86977

60.82119 -55.60571 61.87127

60.81519 -55.61304 61.87264

60.80936 -55.62014 61.87389

60.8037 -55.62696 61.87501

60.79821 -55.63354 61.87604

60.79288 -55.6399 61.87698

60.7877 -55.64604 61.87783

# section 3

XYZ

240

65.93896 -0.1239676 0.054575272

65.93898 -0.1155347 0.055458777

65.93898 -0.1069107 0.056896776

65.93898 -0.098117635 0.058954321

65.93901 -0.089204416 0.061691854

65.93901 -0.080251835 0.065349959

65.93902 -0.071516298 0.070308656

65.93913 -0.062950805 0.076169595

65.93953 -0.054774307 0.083131775

65.94058 -0.047179937 0.091193095

65.94296 -0.040623367 0.1004372

65.94606 -0.034868691 0.1105633

65.94975 -0.030232474 0.1216618

65.95376 -0.026917262 0.1336834

65.9581 -0.025143355 0.1465154

65.9627 -0.025133625 0.1599966

65.96754 -0.027133027 0.1739039

65.9725 -0.031415317 0.1879088

65.97758 -0.038192328 0.2016402

65.98254 -0.047536772 0.2148347

65.98705 -0.0599191 0.2269858

65.99109 -0.074698642 0.2384056

65.99535 -0.090191975 0.2503799

65.99981 -0.1064402 0.2629434

66.00443 -0.1234889 0.2761302

66.00935 -0.1413875 0.2899749

66.01449 -0.1601808 0.3045254

66.01989 -0.1799252 0.319818

66.02557 -0.2006799 0.3358924

66.03153 -0.222496 0.3528088

66.03779 -0.2454416 0.3706084

66.04439 -0.2695863 0.3893384

66.05132 -0.2949908 0.4090702

66.0586 -0.3217358 0.4298526

66.06627 -0.3499022 0.4517433

66.07435 -0.379564 0.4748239

66.08285 -0.4108151 0.4991531

66.0918 -0.4437496 0.5248044

66.10121 -0.4784581 0.5518658

66.11115 -0.5150524 0.5804057

66.12157 -0.5536302 0.6105306

66.13258 -0.5943195 0.6423117

66.14417 -0.6372267 0.6758719

66.15639 -0.6824957 0.7112876

66.16923 -0.7302439 0.7486978

66.18277 -0.7806306 0.7881868

66.19703 -0.8337886 0.8299093

66.21207 -0.8898933 0.8739617

66.2279 -0.949093 0.920511

66.24455 -1.011579 0.9696707

66.26208 -1.077521 1.02162

66.28058 -1.147126 1.076494

66.30003 -1.220593 1.134467

66.32047 -1.298125 1.195738

66.34201 -1.379964 1.260459

66.36465 -1.466339 1.328839

66.38843 -1.55749 1.401105

66.41347 -1.65369 1.477437

66.43979 -1.755207 1.558077

66.46741 -1.862324 1.64326

66.49638 -1.975335 1.733259

66.52683 -2.094562 1.828298

66.55876 -2.220328 1.928663

66.59223 -2.352972 2.034642

66.62732 -2.492851 2.146532

66.66402 -2.640334 2.264643

66.70248 -2.795806 2.389299

66.74261 -2.959666 2.520855

66.78459 -3.132336 2.659631

66.82838 -3.314245 2.806002

66.87411 -3.505842 2.960328

66.92171 -3.707583 3.123038

66.97125 -3.919944 3.294512

67.02277 -4.143418 3.47517

67.07628 -4.378509 3.665436

67.13172 -4.625734 3.865753

67.18913 -4.885628 4.076573

67.24854 -5.158725 4.298352

67.30992 -5.445571 4.531543

67.37312 -5.746723 4.776666

67.43815 -6.062747 5.034179

67.50493 -6.394209 5.304578

67.5734 -6.741678 5.588342

67.64329 -7.105711 5.885997

67.71475 -7.486872 6.197987

67.78725 -7.88572 6.52488

67.86082 -8.302786 6.867101

67.93542 -8.738561 7.225143

68.01027 -9.193377 7.599751

68.08548 -9.667595 7.991454

68.16093 -10.16159 8.400705

68.23636 -10.67572 8.827974

68.31139 -11.21027 9.273706

68.38574 -11.76552 9.738328

68.45898 -12.34163 10.22221

68.53072 -12.93873 10.72571

68.60054 -13.55688 11.24914

68.66803 -14.19605 11.79274

68.7327 -14.85615 12.35674

68.79411 -15.53697 12.94127

68.85177 -16.23824 13.54642

68.9052 -16.95957 14.1722

68.9539 -17.70049 14.81857

68.99738 -18.46039 15.48537

69.03519 -19.2386 16.17239

69.06683 -20.03433 16.87933

69.09187 -20.84666 17.60579

69.11066 -21.67488 18.35097

69.12116 -22.51731 19.11494

69.12387 -23.37303 19.89667

69.11849 -24.24077 20.6954

69.10478 -25.11915 21.51025

69.0825 -26.00671 22.34026

69.05149 -26.90193 23.18436

69.01167 -27.80326 24.04142

68.96301 -28.70906 24.9102

68.90553 -29.61768 25.78941

68.83931 -30.52746 26.67768

68.76457 -31.4367 27.57358

68.68146 -32.34374 28.47562

68.5903 -33.24691 29.38229

68.49139 -34.14455 30.29201

68.38507 -35.03509 31.20323

68.27098 -35.91642 32.11474

68.1496 -36.78716 33.02493

68.02307 -37.64719 33.93129

67.89286 -38.49595 34.83176

67.7575 -39.33058 35.72611

67.61893 -40.15041 36.61271

67.47551 -40.95232 37.49174

67.32925 -41.73555 38.36186

67.18094 -42.4998 39.2213

67.03148 -43.24498 40.06826

66.88052 -43.96983 40.90199

66.72917 -44.67456 41.72088

66.57793 -45.35881 42.52388

66.42728 -46.02219 43.3102

66.27747 -46.66415 44.07918

66.12933 -47.28514 44.8298

65.98301 -47.88472 45.56173

65.83907 -48.46325 46.27424

65.69779 -49.02072 46.96696

65.55933 -49.55712 47.63975

65.42421 -50.07304 48.29214

65.29245 -50.5686 48.92407

65.16434 -51.04408 49.53553

65.04002 -51.50007 50.12637

64.91956 -51.93676 50.69683

64.80314 -52.35485 51.24688

64.69068 -52.7546 51.77685

64.58238 -53.13673 52.28687

64.47809 -53.50157 52.77733

64.37794 -53.84988 53.24844

64.2818 -54.18194 53.70072

64.18962 -54.49848 54.13448

64.10144 -54.80012 54.55011

64.01707 -55.0872 54.94818

63.93644 -55.36041 55.32909

63.8595 -55.62028 55.69335

63.78614 -55.86736 56.04143

63.71622 -56.10216 56.37387

63.64961 -56.32527 56.69112

63.58627 -56.53707 56.99382

63.52604 -56.73815 57.28242

63.46878 -56.92889 57.55748

63.41438 -57.10989 57.81945

63.36274 -57.28156 58.06884

63.31375 -57.44433 58.30618

63.26728 -57.59865 58.53195

63.22318 -57.7449 58.74663

63.18139 -57.8834 58.95077

63.1418 -58.01467 59.14469

63.10428 -58.13902 59.3289

63.06876 -58.25671 59.50389

63.03512 -58.36823 59.67001

63.00327 -58.47376 59.82769

62.97311 -58.5737 59.97731

62.94456 -58.66833 60.11924

62.91756 -58.75781 60.25394

62.89199 -58.84261 60.38162

62.86782 -58.92274 60.50276

62.84494 -58.9986 60.6176

62.82331 -59.07045 60.72643

62.80283 -59.13836 60.82962

62.78346 -59.20271 60.92739

62.76516 -59.26352 61.0201

62.74783 -59.32107 61.10794

62.73143 -59.37561 61.19114

62.71595 -59.42714 61.27003

62.70127 -59.4759 61.34477

62.6874 -59.52209 61.41558

62.67428 -59.56582 61.48265

62.66189 -59.60718 61.54623

62.65016 -59.64632 61.60648

62.63909 -59.68339 61.66356

62.6284 -59.71864 61.71746

62.61838 -59.75193 61.76856

62.6088 -59.78352 61.81691

62.59964 -59.8135 61.86263

62.59083 -59.84198 61.90583

62.58211 -59.86926 61.94653

62.57378 -59.895 61.98485

62.56535 -59.91976 62.02071

62.55692 -59.94347 62.05429

62.54847 -59.96618 62.08572

62.53997 -59.98801 62.11504

62.53137 -60.009 62.1423

62.5226 -60.02925 62.1676

62.53398 -60.0459 62.1942

62.52029 -60.0655 62.2195

62.5066 -60.0832 62.2391

62.49298 -60.1031 62.2562

62.47954 -60.1192 62.2682

62.46633 -60.1379 62.2799

62.45341 -60.15498 62.29044

62.44079 -60.1719 62.29915

62.42849 -60.1881 62.30696

62.41655 -60.20361 62.31396

62.40498 -60.21844 62.32024

62.39377 -60.23262 62.32589

62.38291 -60.24619 62.33098

62.37242 -60.25917 62.33555

62.36228 -60.27158 62.33969

62.35248 -60.28345 62.34341

62.34303 -60.29482 62.34679

62.3339 -60.30569 62.34983

62.32509 -60.3161 62.35259

62.31659 -60.32608 62.35509

62.30837 -60.33566 62.35735

62.30043 -60.34482 62.35941

62.29278 -60.35363 62.36126

62.28537 -60.36208 62.36295

62.27821 -60.37021 62.36448

62.27129 -60.37802 62.36586

62.2646 -60.38554 62.36712

62.25811 -60.39279 62.36826

62.25182 -60.39978 62.36929

62.24574 -60.4065 62.37022

62.23984 -60.413 62.37107

62.23412 -60.41929 62.37184

# section 4

XYZ

240

77.66025 -0.2183841 0.2199931

77.66026 -0.2095209 0.2215412

77.66027 -0.2004879 0.2236586

77.66026 -0.1913191 0.2264337

77.66032 -0.1820826 0.2299562

77.66032 -0.1728882 0.2344807

77.66034 -0.1640605 0.240429

77.66044 -0.1555282 0.2473702

77.66071 -0.14755 0.2555138

77.66145 -0.1403362 0.264858

77.66307 -0.1343712 0.2754938

77.66523 -0.129456 0.2870806

77.66776 -0.1259878 0.2996628

77.67056 -0.1242368 0.3131226

77.67356 -0.1244538 0.3272624

77.67674 -0.1268697 0.3418103

77.68008 -0.1317477 0.3563944

77.68354 -0.13942 0.3704342

77.68711 -0.1501133 0.3833044

77.69059 -0.1634062 0.3950703

77.69376 -0.1785625 0.4064491

77.69653 -0.1950751 0.417907

77.69946 -0.2123863 0.4299204

77.70256 -0.2305431 0.4425228

77.70574 -0.2495959 0.4557484

77.70912 -0.2695986 0.4696338

77.71267 -0.2906063 0.484222

77.71638 -0.3126791 0.4995521

77.72031 -0.3358813 0.5156662

77.72442 -0.3602768 0.5326168

77.72873 -0.385938 0.5504496

77.73328 -0.4129405 0.5692145

77.73805 -0.4413602 0.5889737

77.74304 -0.4712827 0.6097814

77.74831 -0.5027968 0.6316974

77.75385 -0.5359936 0.6547942

77.75967 -0.5709732 0.6791354

77.76582 -0.6078413 0.7047973

77.77225 -0.6467047 0.7318581

77.77906 -0.6876827 0.7603946

77.78613 -0.7308942 0.7905015

77.79366 -0.7764736 0.822261

77.80154 -0.8245531 0.8557815

77.80984 -0.875282 0.8911522

77.81857 -0.9288065 0.9284952

77.82774 -0.9852931 0.9679088

77.83738 -1.044906 1.00953

77.84754 -1.10783 1.053469

77.85821 -1.174246 1.099874

77.86941 -1.244356 1.148872

77.88119 -1.318367 1.200626

77.89359 -1.396501 1.25528

77.90659 -1.478986 1.313

77.92022 -1.566061 1.373972

77.93457 -1.657988 1.438362

77.94955 -1.75503 1.506366

77.96529 -1.857467 1.578201

77.98177 -1.965595 1.654055

77.99908 -2.079723 1.73416

78.01714 -2.200172 1.818745

78.036 -2.327279 1.90807

78.05576 -2.461399 2.002368

78.07636 -2.602901 2.101915

78.09787 -2.75217 2.206992

78.12029 -2.909608 2.317888

78.14362 -3.07563 2.434907

78.1679 -3.250674 2.558367

78.19305 -3.435184 2.688603

78.21915 -3.629637 2.825958

78.24615 -3.834513 2.970778

78.27417 -4.050318 3.123426

78.30304 -4.277565 3.284315

78.33276 -4.516785 3.453826

78.36331 -4.768527 3.63237

78.39468 -5.033355 3.820369

78.42672 -5.31184 4.018258

78.45942 -5.604573 4.226485

78.49273 -5.912149 4.445504

78.52657 -6.235171 4.675768

78.56065 -6.57424 4.917792

78.59501 -6.929985 5.172044

78.6294 -7.303008 5.439021

78.66373 -7.693934 5.719208

78.69761 -8.103348 6.013141

78.73116 -8.531874 6.321279

78.76373 -8.980058 6.644217

78.79526 -9.448483 6.98239

78.82565 -9.937691 7.336298

78.85391 -10.44804 7.706666

78.8801 -10.97997 8.094004

78.90395 -11.53389 8.498789

78.92511 -12.11018 8.921494

78.94315 -12.70914 9.362555

78.95773 -13.33105 9.822407

78.96824 -13.97608 10.30143

78.97421 -14.64435 10.8

78.97511 -15.33588 11.31841

78.97047 -16.05063 11.85694

78.95968 -16.78846 12.41581

78.94221 -17.54912 12.99517

78.91752 -18.33227 13.59511

78.88503 -19.13746 14.21566

78.84418 -19.96413 14.85677

78.79441 -20.81159 15.51832

78.73522 -21.67905 16.20009

78.66608 -22.56559 16.90178

78.58654 -23.4702 17.62302

78.49709 -24.39212 18.363

78.39536 -25.32929 19.12182

78.28206 -26.28077 19.89845

78.15692 -27.24511 20.69212

78.01972 -28.22077 21.50199

77.87035 -29.20611 22.32706

77.70869 -30.19944 23.1663

77.53482 -31.19901 24.01857

77.34882 -32.203 24.88263

77.15086 -33.20958 25.7572

76.94118 -34.21689 26.6409

76.72021 -35.22307 27.5323

76.48829 -36.22626 28.42992

76.24597 -37.22466 29.33224

75.99376 -38.21637 30.23768

75.73216 -39.19963 31.14472

75.46091 -40.17193 32.05222

75.181 -41.13168 32.95877

74.89549 -42.07885 33.86197

74.60661 -43.01289 34.75986

74.31303 -43.92976 35.65297

74.0174 -44.82819 36.54053

73.71896 -45.70451 37.42295

73.41953 -46.55648 38.30033

73.12032 -47.38476 39.16985

72.82257 -48.18988 40.0291

72.52618 -48.97021 40.87739

72.23238 -49.72663 41.71254

71.94183 -50.45906 42.53315

71.65501 -51.16724 43.33818

71.37218 -51.85071 44.12683

71.09438 -52.51048 44.89767

70.82172 -53.14607 45.65032

70.55482 -53.75822 46.38371

70.29389 -54.34702 47.09733

70.03918 -54.91258 47.79101

69.79121 -55.45582 48.46405

69.55 -55.97685 49.11636

69.3158 -56.4763 49.74771

69.08878 -56.95475 50.35799

68.86886 -57.41248 50.94736

68.65633 -57.85036 51.51574

68.45097 -58.26869 52.06345

68.25303 -58.66838 52.59052

68.06225 -59.04977 53.09739

67.87875 -59.41373 53.58424

67.70229 -59.76058 54.05156

67.53282 -60.09113 54.49973

67.37032 -60.40607 54.9291

67.21448 -60.70574 55.34025

67.06522 -60.99091 55.73359

66.92241 -61.26215 56.10965

66.78585 -61.52005 56.46893

66.65536 -61.76514 56.81198

66.53075 -61.998 57.13934

66.41184 -62.21914 57.45155

66.29843 -62.42912 57.74916

66.19032 -62.62833 58.0327

66.08733 -62.81739 58.30273

65.98925 -62.99673 58.55972

65.89592 -63.16683 58.80424

65.80716 -63.32812 59.03677

65.72273 -63.48103 59.25784

65.64242 -63.62585 59.46798

65.56616 -63.76318 59.66759

65.49372 -63.89329 59.85715

65.4249 -64.01647 60.0372

65.3596 -64.13322 60.20807

65.29758 -64.24374 60.37024

65.23877 -64.34843 60.52409

65.18297 -64.44755 60.67

65.13002 -64.54132 60.80845

65.07983 -64.63021 60.93967

65.03223 -64.71422 61.06414

64.98708 -64.79378 61.18211

64.94434 -64.86914 61.29391

64.90377 -64.94039 61.3999

64.86536 -65.0079 61.50032

64.82897 -65.07173 61.5955

64.79446 -65.13213 61.68571

64.76179 -65.1894 61.77112

64.73083 -65.24352 61.8521

64.70148 -65.29475 61.9288

64.67367 -65.34328 62.00145

64.64726 -65.38934 62.07019

64.62222 -65.43296 62.13531

64.59837 -65.4743 62.19693

64.57574 -65.51357 62.25524

64.55428 -65.55075 62.31046

64.53368 -65.58622 62.36251

64.51401 -65.61994 62.41171

64.4952 -65.65202 62.45819

64.47724 -65.68251 62.50211

64.46001 -65.71154 62.54357

64.4438 -65.7388 62.58281

64.42767 -65.76524 62.61932

64.41209 -65.79044 62.65366

64.39699 -65.81446 62.68587

64.38236 -65.83738 62.71607

64.36813 -65.85927 62.74428

64.35421 -65.88021 62.77057

64.35102 -65.89812 62.80674

64.33608 -65.917 62.82837

64.32077 -65.9358 62.84691

64.30532 -65.95438 62.86289

64.28995 -65.97264 62.87668

64.27473 -65.99043 62.8887

64.25979 -66.00771 62.89915

64.24516 -66.02445 62.90831

64.2309 -66.04058 62.91636

64.21703 -66.05614 62.92347

64.20364 -66.07107 62.92974

64.19064 -66.0854 62.93532

64.17809 -66.09917 62.94028

64.16598 -66.11237 62.94468

64.15431 -66.12501 62.94864

64.14304 -66.13713 62.95215

64.13219 -66.14874 62.95532

64.12175 -66.15986 62.95815

64.11166 -66.17053 62.9607

64.10197 -66.18076 62.963

64.09263 -66.19057 62.96508

64.08362 -66.19997 62.96695

64.07494 -66.20901 62.96862

64.06655 -66.2177 62.97015

64.05848 -66.22602 62.97152

64.05067 -66.23405 62.97276

64.04313 -66.24178 62.97388

64.03584 -66.24921 62.97488

64.0288 -66.25641 62.97579

64.02198 -66.26332 62.97661

64.01537 -66.26999 62.97734

64.00898 -66.27645 62.97802

# section 5

XYZ

240

90.2598 -0.022245731 0.5368385

90.2598 -0.012701371 0.5387746

90.25979 -0.0030019251 0.5413547

90.25975 0.0068057096 0.5446845

90.25979 0.016634407 0.548875

90.25975 0.026333196 0.5542104

90.25976 0.03549267 0.5611677

90.25978 0.044194616 0.5692515

90.25988 0.052120168 0.5786864

90.26022 0.059024286 0.5894579

90.26102 0.064344719 0.6016387

90.26212 0.068292141 0.6148162

90.26343 0.070378408 0.6289636

90.26488 0.070270486 0.6438519

90.26644 0.06765376 0.6591272

90.26814 0.062239964 0.6743101

90.26996 0.053831823 0.688867

90.27181 0.042391311 0.7022907

90.27384 0.028050361 0.7142568

90.27575 0.011469394 0.725178

90.27752 -0.0062919823 0.7361677

90.27901 -0.024929328 0.7476455

90.2806 -0.04447154 0.7596716

90.28228 -0.064979374 0.7722671

90.28395 -0.086505488 0.7854753

90.28579 -0.109102 0.7993472

90.28771 -0.1328452 0.8138986

90.2897 -0.1577936 0.8291886

90.29182 -0.1840183 0.8452606

90.29403 -0.2115946 0.8621633

90.29633 -0.2406026 0.8799443

90.29877 -0.2711272 0.8986543

90.30132 -0.3032569 0.9183517

90.30398 -0.3370871 0.939092

90.30677 -0.3727193 0.9609353

90.30972 -0.4102556 0.9839521

90.31281 -0.4498103 1.008205

90.31604 -0.4915002 1.033774

90.31942 -0.5354512 1.060731

90.32299 -0.5817944 1.089156

90.32665 -0.6306709 1.119137

90.33057 -0.6822248 1.150764

90.33464 -0.7366115 1.184137

90.33894 -0.7939966 1.219349

90.34339 -0.8545514 1.256515

90.34805 -0.9184596 1.29574

90.35295 -0.9859107 1.337151

90.3581 -1.057109 1.380865

90.36343 -1.132266 1.427022

90.369 -1.211609 1.475752

90.37485 -1.29537 1.527212

90.38097 -1.383801 1.58155

90.38731 -1.477163 1.638925

90.39388 -1.575729 1.699519

90.40078 -1.679788 1.763502

90.40787 -1.789645 1.831065

90.41524 -1.905615 1.902417

90.42287 -2.028033 1.977752

90.43083 -2.157248 2.057295

90.439 -2.293625 2.141273

90.44736 -2.437544 2.229939

90.45603 -2.589408 2.32353

90.46486 -2.749633 2.422315

90.47392 -2.918653 2.526569

90.48319 -3.096922 2.636584

90.49257 -3.284912 2.752655

90.5021 -3.48311 2.875101

90.5116 -3.692025 3.004246

90.52112 -3.91218 3.140445

90.53063 -4.144129 3.284026

90.54012 -4.388435 3.435358

90.5494 -4.645669 3.594848

90.55836 -4.916429 3.762875

90.56697 -5.20133 3.939852

90.57512 -5.500998 4.126197

90.5826 -5.816073 4.322347

90.58935 -6.147209 4.528751

90.59523 -6.495062 4.745865

90.60005 -6.860312 4.974144

90.60347 -7.243609 5.214109

90.60545 -7.645646 5.466237

90.60567 -8.067085 5.731033

90.60393 -8.508606 6.008993

90.59971 -8.970837 6.300671

90.59312 -9.45447 6.606535

90.58332 -9.960053 6.927215

90.5702 -10.48823 7.263158

90.55361 -11.0396 7.614882

90.53226 -11.61451 7.983129

90.50621 -12.21348 8.368385

90.475 -12.837 8.7711

90.43818 -13.48545 9.19171

90.39525 -14.15921 9.630619

90.3458 -14.85857 10.08826

90.28905 -15.58366 10.56501

90.22442 -16.33459 11.06125

90.1512 -17.11137 11.57728

90.06889 -17.91393 12.11337

89.97675 -18.74205 12.66973

89.87416 -19.59545 13.24652

89.76047 -20.4737 13.84383

89.63503 -21.37626 14.46168

89.49718 -22.30246 15.10003

89.34626 -23.25147 15.75873

89.18178 -24.2224 16.43757

89.00313 -25.21417 17.13626

88.80984 -26.2256 17.8544

88.60258 -27.25585 18.5912

88.37859 -28.30247 19.34672

88.1388 -29.36443 20.11995

87.88301 -30.44005 20.9101

87.61106 -31.52759 21.71633

87.32288 -32.62516 22.53763

87.01852 -33.73083 23.37296

86.69817 -34.84264 24.22116

86.36206 -35.9585 25.08101

86.01053 -37.07635 25.95121

85.64408 -38.19409 26.83038

85.26331 -39.30962 27.71708

84.86881 -40.42084 28.60982

84.46142 -41.52573 29.50708

84.04188 -42.62217 30.4073

83.61091 -43.70812 31.30895

83.16836 -44.7807 32.21093

82.71564 -45.83813 33.11184

82.25685 -46.88069 34.0094

81.7949 -47.9079 34.90175

81.32827 -48.91503 35.78952

80.86009 -49.90074 36.67224

80.39013 -50.86122 37.55029

79.91959 -51.79321 38.42446

79.45047 -52.69778 39.29172

78.98463 -53.57579 40.14947

78.52201 -54.4253 40.99713

78.06437 -55.24751 41.83236

77.6126 -56.04237 42.65368

77.16734 -56.80961 43.46008

76.72902 -57.54878 44.25072

76.29902 -58.26123 45.02401

75.87746 -58.94645 45.77958

75.46523 -59.60532 46.51628

75.06261 -60.23804 47.23359

74.66992 -60.84479 47.93127

74.28784 -61.42672 48.60854

73.91637 -61.98395 49.26532

73.55591 -62.51742 49.90126

73.2066 -63.02767 50.51625

72.86834 -63.51506 51.11048

72.54149 -63.98071 51.68375

72.22577 -64.42494 52.23639

71.92142 -64.84885 52.76838

71.62813 -65.25279 53.28017

71.34599 -65.63786 53.77188

71.07468 -66.00435 54.24403

70.81409 -66.35321 54.69691

70.56416 -66.68528 55.13092

70.32446 -67.00087 55.5466

70.09483 -67.30089 55.94437

69.87505 -67.58598 56.32473

69.66485 -67.8568 56.6882

69.46394 -68.11395 57.03529

69.27204 -68.35802 57.36658

69.08885 -68.58965 57.68257

68.91409 -68.80941 57.98381

68.74744 -69.01776 58.27086

68.58862 -69.21534 58.54426

68.43737 -69.40264 58.80449

68.29338 -69.58017 59.05211

68.15638 -69.74841 59.28762

68.02603 -69.90784 59.51152

67.90204 -70.05871 59.72438

67.78423 -70.20172 59.92659

67.67231 -70.33716 60.11863

67.56593 -70.46531 60.30104

67.46497 -70.58673 60.47415

67.36907 -70.70159 60.63848

67.27808 -70.81037 60.79437

67.19176 -70.91334 60.94222

67.10982 -71.0107 61.08252

67.03212 -71.10294 61.2155

66.95841 -71.19011 61.34164

66.8885 -71.27261 61.46121

66.82227 -71.35078 61.57452

66.75943 -71.42462 61.68195

66.69992 -71.4946 61.78372

66.64349 -71.56072 61.88021

66.58998 -71.62328 61.97164

66.53934 -71.68259 62.05822

66.49133 -71.73862 62.1403

66.4458 -71.79164 62.21806

66.40266 -71.84187 62.29172

66.36174 -71.88954 62.3614

66.32291 -71.93465 62.42741

66.28602 -71.9774 62.48991

66.25101 -72.01801 62.54905

66.21789 -72.05643 62.60508

66.18619 -72.09304 62.65792

66.15602 -72.12784 62.70789

66.1273 -72.16093 62.75514

66.09996 -72.19235 62.79981

66.07396 -72.22216 62.84206

66.04942 -72.25027 62.88208

66.02555 -72.27737 62.9195

66.00271 -72.30314 62.95478

65.98087 -72.32764 62.98801

65.95995 -72.35098 63.01928

65.9399 -72.37319 63.04864

65.92061 -72.39436 63.07617

65.90633 -72.41545 63.10777

65.88903 -72.43312 63.13323

65.87067 -72.45144 63.15421

65.85243 -72.46955 63.17266

65.83443 -72.48732 63.18888

65.81679 -72.50468 63.20325

65.79955 -72.52158 63.21597

65.78275 -72.53798 63.22729

65.76645 -72.55379 63.23737

65.75064 -72.56911 63.24637

65.73539 -72.58384 63.25443

65.72063 -72.59801 63.26164

65.70638 -72.61167 63.26812

65.69265 -72.62478 63.27393

65.67944 -72.63737 63.27916

65.66668 -72.64947 63.28386

65.65441 -72.66111 63.2881

65.64259 -72.67226 63.29192

65.6312 -72.683 63.29536

65.62022 -72.69331 63.29847

65.60966 -72.70322 63.30127

65.59947 -72.71274 63.30381

65.58967 -72.72192 63.30608

65.58019 -72.73072 63.30814

65.57105 -72.73921 63.30999

65.56223 -72.74739 63.31166

65.55372 -72.7553 63.31316

65.54548 -72.76292 63.3145

65.53751 -72.77028 63.31571

65.52981 -72.77738 63.31679

65.52234 -72.78424 63.31776

65.51511 -72.79089 63.31864

# section 6

XYZ

240

101.9739 0.4408544 0.962562

101.9738 0.4512393 0.9645519

101.9738 0.461774 0.9673102

101.9737 0.4724009 0.9709535

101.9737 0.4830092 0.9755982

101.9736 0.4934155 0.981578

101.9735 0.5031127 0.9894264

101.9734 0.5121924 0.9985667

101.9734 0.5202644 1.009243

101.9733 0.5270256 1.02141

101.9733 0.5317808 1.035093

101.9734 0.534794 1.049782

101.9735 0.5355003 1.065367

101.9737 0.5335165 1.081482

101.974 0.5284373 1.097564

101.9743 0.5198741 1.112858

101.9747 0.507761 1.126671

101.9752 0.4926712 1.138892

101.9758 0.4753991 1.150006

101.9763 0.4565811 1.160756

101.9768 0.4366908 1.171772

101.9772 0.4158064 1.183237

101.9776 0.3939 1.195234

101.978 0.3708947 1.207764

101.9784 0.3467399 1.220888

101.9788 0.3213878 1.234679

101.9793 0.2947303 1.249107

101.9798 0.26672 1.264266

101.9803 0.2372776 1.280202

101.9808 0.2063181 1.296961

101.9813 0.1737517 1.314591

101.9819 0.1394836 1.333143

101.9825 0.1034143 1.352674

101.9831 0.06543646 1.373239

101.9837 0.025437413 1.394899

101.9843 -0.016698498 1.417722

101.985 -0.061099734 1.441772

101.9857 -0.1078954 1.467126

101.9863 -0.1572275 1.493858

101.987 -0.209244 1.522046

101.9877 -0.2640998 1.551779

101.9884 -0.3219606 1.583143

101.9891 -0.3829977 1.61624

101.9898 -0.4473982 1.651162

101.9905 -0.5153515 1.688022

101.9912 -0.5870659 1.726925

101.9918 -0.6627513 1.767997

101.9925 -0.7426391 1.811355

101.9931 -0.8269624 1.857138

101.9937 -0.915978 1.905475

101.9942 -1.009945 1.956522

101.9947 -1.109146 2.010423

101.9951 -1.213871 2.067341

101.9954 -1.324424 2.127456

101.9956 -1.441131 2.190937

101.9957 -1.564331 2.257972

101.9956 -1.694372 2.328771

101.9953 -1.831636 2.403525

101.9949 -1.976507 2.482459

101.9942 -2.129393 2.565801

101.9931 -2.290713 2.653804

101.9918 -2.460921 2.746701

101.9901 -2.64048 2.844759

101.988 -2.829874 2.948255

101.9854 -3.029604 3.057477

101.9822 -3.240196 3.172726

101.9785 -3.462191 3.294319

101.9739 -3.696151 3.42258

101.9684 -3.942653 3.557865

101.9621 -4.202321 3.700499

101.9549 -4.475777 3.85085

101.9464 -4.763643 4.009332

101.9366 -5.066584 4.176323

101.9253 -5.385278 4.352239

101.9124 -5.720412 4.537503

101.8976 -6.072691 4.732551

101.8807 -6.442835 4.937839

101.8616 -6.831562 5.15383

101.84 -7.239621 5.38098

101.8154 -7.667705 5.619826

101.7878 -8.116583 5.870845

101.7568 -8.586973 6.134555

101.722 -9.079606 6.411468

101.6829 -9.595153 6.702159

101.6394 -10.13438 7.00709

101.5907 -10.69785 7.326927

101.5365 -11.28626 7.662137

101.4766 -11.90024 8.013247

101.4095 -12.54012 8.381058

101.3352 -13.20649 8.766006

101.253 -13.8999 9.168478

101.1625 -14.6208 9.588843

101.0631 -15.36961 10.02746

100.9542 -16.14662 10.48471

100.835 -16.95195 10.96101

100.7046 -17.78568 11.45671

100.5624 -18.64778 11.97211

100.4076 -19.53815 12.50745

100.2396 -20.45652 13.06294

100.0574 -21.40252 13.63872

99.86053 -22.37563 14.23486

99.64805 -23.3752 14.85139

99.4193 -24.40047 15.48824

99.17357 -25.45045 16.14524

98.91027 -26.52411 16.82218

98.62878 -27.6202 17.51874

98.3286 -28.73735 18.23452

98.01055 -29.87464 18.96872

97.67155 -31.02922 19.72136

97.31274 -32.19994 20.49143

96.93396 -33.3849 21.27813

96.53512 -34.5821 22.0806

96.11623 -35.78943 22.89783

95.67746 -37.00471 23.72877

95.21916 -38.22571 24.57226

94.74174 -39.45013 25.42706

94.24567 -40.67562 26.29186

93.73168 -41.89987 27.1653

93.20059 -43.1205 28.04593

92.65324 -44.33522 28.93227

92.09072 -45.54174 29.8228

91.51403 -46.73776 30.71599

90.92411 -47.92094 31.61032

90.32091 -49.08811 32.50464

89.70619 -50.23743 33.3975

89.08496 -51.3695 34.28675

88.46074 -52.48401 35.17058

87.83162 -53.57595 36.0494

87.20096 -54.64423 36.92256

86.56879 -55.68524 37.79037

85.93558 -56.69505 38.65378

85.3042 -57.67473 39.51013

84.67721 -58.62521 40.35691

84.05462 -59.54428 41.19372

83.43877 -60.43322 42.01828

82.8309 -61.29188 42.82929

82.23183 -62.11991 43.62582

81.64223 -62.91677 44.40712

81.06386 -63.684 45.17158

80.49699 -64.42104 45.91885

79.94274 -65.12885 46.64786

79.40156 -65.80766 47.35813

78.8738 -66.4577 48.04936

78.36042 -67.08029 48.72075

77.86142 -67.6756 49.37223

77.37736 -68.24477 50.00339

76.90835 -68.78837 50.61415

76.45429 -69.30674 51.20469

76.01566 -69.80132 51.77472

75.59207 -70.27245 52.32457

75.18385 -70.72138 52.85416

74.79054 -71.1485 53.36395

74.41229 -71.55511 53.85398

74.04865 -71.9415 54.3248

73.6995 -72.30882 54.77664

73.36467 -72.65798 55.20982

73.04365 -72.98935 55.62495

72.7362 -73.30393 56.02237

72.44199 -73.60248 56.40258

72.16066 -73.88572 56.76604

71.89185 -74.15433 57.11329

71.63514 -74.40899 57.44484

71.39013 -74.65037 57.76121

71.15645 -74.8791 58.06293

70.93366 -75.09574 58.35053

70.7214 -75.30095 58.62455

70.51928 -75.49528 58.88545

70.32689 -75.67928 59.13378

70.14386 -75.85352 59.37003

69.96977 -76.01847 59.59469

69.80421 -76.17442 59.80836

69.64692 -76.32211 60.01135

69.49751 -76.4619 60.20419

69.35555 -76.59401 60.38741

69.22081 -76.71912 60.56131

69.09286 -76.83738 60.72644

68.97146 -76.94931 60.8831

68.85632 -77.05522 61.03172

68.74702 -77.15524 61.17277

68.64342 -77.25001 61.30648

68.54511 -77.33944 61.43335

68.45191 -77.42406 61.55362

68.36362 -77.5042 61.66761

68.27985 -77.57986 61.7757

68.20052 -77.65157 61.8781

68.12531 -77.71925 61.97521

68.05401 -77.78327 62.06723

67.98653 -77.84395 62.15436

67.92253 -77.90123 62.237

67.86188 -77.95543 62.3153

67.80443 -78.00674 62.38947

67.74999 -78.05539 62.4597

67.69838 -78.10133 62.52628

67.64944 -78.14486 62.58935

67.60303 -78.18609 62.64909

67.5591 -78.2252 62.70564

67.51734 -78.26222 62.75919

67.4777 -78.29734 62.8099

67.44007 -78.33066 62.85791

67.40436 -78.36227 62.90337

67.37045 -78.39223 62.94641

67.33833 -78.42067 62.98712

67.30759 -78.44776 63.02552

67.2783 -78.47352 63.0618

67.25043 -78.49799 63.09608

67.22385 -78.52129 63.12846

67.19852 -78.54346 63.15898

67.17432 -78.5646 63.18774

67.15263 -78.58505 63.2168

67.13243 -78.60239 63.24545

67.11043 -78.62103 63.26823

67.08904 -78.63919 63.28897

67.06828 -78.65681 63.30781

67.04818 -78.6739 63.32494

67.02874 -78.69044 63.34052

67.00993 -78.70644 63.35468

66.99175 -78.72188 63.36754

66.97421 -78.73679 63.37923

66.95731 -78.75117 63.38984

66.94099 -78.76504 63.39947

66.92526 -78.7784 63.40821

66.91013 -78.79127 63.41615

66.89555 -78.80367 63.42335

66.88148 -78.81558 63.42987

66.86795 -78.8271 63.43578

66.8549 -78.83817 63.44115

66.84232 -78.84885 63.446

66.83022 -78.85912 63.45039

66.81853 -78.86905 63.45436

66.80727 -78.8786 63.45796

66.79639 -78.88782 63.46121

66.78591 -78.89671 63.46413

66.77579 -78.9053 63.46677

66.76599 -78.91359 63.46914

66.75655 -78.92161 63.47127

66.74738 -78.92937 63.47318

66.73854 -78.93687 63.47489

66.72997 -78.94414 63.47642

66.72166 -78.95118 63.47778

66.71362 -78.95798 63.47901

# section 7

XYZ

240

111.5202 0.8182534 1.309502

111.5201 0.8293234 1.311535

111.52 0.8405388 1.314439

111.5198 0.851833 1.318337

111.5198 0.8630767 1.323352

111.5197 0.8740595 1.329857

111.5195 0.8841953 1.338432

111.5194 0.8935828 1.348433

111.5191 0.9017741 1.360121

111.5187 0.9084185 1.373425

111.5181 0.9127135 1.388333

111.5173 0.914965 1.404252

111.5165 0.9145468 1.42101

111.5157 0.9110351 1.438125

111.5149 0.9039484 1.454864

111.5141 0.8928186 1.470248

111.5134 0.877686 1.483455

111.5128 0.8596225 1.494696

111.5122 0.8399619 1.505115

111.5116 0.8193209 1.515727

111.5111 0.7976955 1.526763

111.5105 0.7749798 1.538218

111.5099 0.7511469 1.550192

111.5093 0.7261062 1.562669

111.5087 0.6998093 1.575724

111.508 0.6722112 1.589449

111.5073 0.6431789 1.603775

111.5065 0.6126735 1.618829

111.5057 0.5806083 1.634653

111.5049 0.5468922 1.651296

111.5039 0.5114258 1.668803

111.503 0.4741067 1.687225

111.502 0.4348267 1.706621

111.5009 0.3934692 1.727044

111.4997 0.3499113 1.748554

111.4985 0.304027 1.771219

111.4972 0.2556761 1.795103

111.4957 0.2047195 1.820282

111.4942 0.1510022 1.846831

111.4926 0.094362535 1.874825

111.4907 0.034633525 1.904356

111.4888 -0.028366785 1.935507

111.4868 -0.094823562 1.968378

111.4846 -0.1649413 2.003062

111.4821 -0.2389241 2.039674

111.4796 -0.317 2.078315

111.4768 -0.3993959 2.119112

111.4738 -0.486365 2.162179

111.4706 -0.5781584 2.207657

111.4671 -0.6750568 2.255674

111.4633 -0.7773408 2.306383

111.4592 -0.8853182 2.35993

111.4548 -0.9993042 2.416476

111.4499 -1.119625 2.4762

111.4448 -1.24664 2.53927

111.439 -1.380713 2.605876

111.4328 -1.522223 2.676224

111.4262 -1.671583 2.750505

111.4189 -1.829214 2.828942

111.411 -1.995553 2.911766

111.4023 -2.171053 2.999229

111.3928 -2.356212 3.09156

111.3825 -2.551528 3.189026

111.3713 -2.757524 3.291904

111.359 -2.974744 3.40048

111.3456 -3.203755 3.515059

111.331 -3.445143 3.635956

111.315 -3.699514 3.763499

111.2973 -3.967487 3.898039

111.2782 -4.249744 4.0399

111.2573 -4.546957 4.189452

111.2343 -4.859785 4.347111

111.2092 -5.188951 4.513259

111.1817 -5.535184 4.688311

111.1516 -5.899221 4.872693

111.1186 -6.281821 5.066843

111.0825 -6.683753 5.271223

111.043 -7.105791 5.486296

110.9999 -7.548735 5.712526

110.9525 -8.013318 5.950462

110.9008 -8.500371 6.200577

110.8443 -9.010652 6.463403

110.7826 -9.544938 6.739463

110.715 -10.10393 7.029349

110.6415 -10.68847 7.333519

110.561 -11.29911 7.652669

110.4734 -11.9366 7.987281

110.3782 -12.60161 8.337892

110.2738 -13.29443 8.705348

110.1601 -14.01574 9.090045

110.0365 -14.76611 9.49232

109.9022 -15.54605 9.912484

109.7568 -16.35601 10.35085

109.5994 -17.1963 10.8078

109.4293 -18.06703 11.28372

109.2454 -18.96823 11.77899

109.0469 -19.89987 12.29387

108.8331 -20.8618 12.8286

108.6032 -21.85371 13.38338

108.3562 -22.87517 13.95834

108.0915 -23.92558 14.55354

107.8081 -25.00423 15.16899

107.5053 -26.11022 15.80461

107.1823 -27.2425 16.46022

106.8384 -28.39986 17.13561

106.4731 -29.58097 17.83044

106.0858 -30.78429 18.5443

105.6775 -32.0088 19.27638

105.2448 -33.25137 20.02667

104.789 -34.51072 20.79416

104.31 -35.78477 21.57806

103.8077 -37.07135 22.37746

103.2823 -38.36812 23.19138

102.734 -39.67273 24.01874

102.1633 -40.98272 24.85838

101.5707 -42.29559 25.70906

100.9568 -43.60882 26.56948

100.3226 -44.91986 27.43824

99.66901 -46.22615 28.31392

98.9971 -47.5252 29.19505

98.30817 -48.81456 30.0801

97.60342 -50.09172 30.96755

96.88395 -51.35414 31.85593

96.14981 -52.5984 32.744

95.40309 -53.82261 33.63031

94.64947 -55.02761 34.51279

93.89301 -56.21327 35.38966

93.13146 -57.37434 36.2612

92.36838 -58.5099 37.12656

91.60405 -59.61655 37.98604

90.83825 -60.68977 38.84068

90.07465 -61.73066 39.68813

89.31633 -62.74019 40.52597

88.56337 -63.71595 41.35394

87.81859 -64.65926 42.1698

87.0835 -65.56992 42.9724

86.35909 -66.44749 43.76088

85.6462 -67.29136 44.53458

84.94695 -68.10324 45.29184

84.26164 -68.88252 46.03234

83.59167 -69.6302 46.7551

82.93755 -70.34657 47.45963

82.29973 -71.03189 48.14562

81.67934 -71.68764 48.81221

81.07641 -72.31397 49.45936

80.4916 -72.91223 50.08663

79.92506 -73.48299 50.69394

79.37664 -74.02662 51.28147

78.84689 -74.54479 51.84885

78.33542 -75.03782 52.39643

77.84254 -75.50714 52.92406

77.36774 -75.95315 53.43223

76.91116 -76.37731 53.9209

76.47228 -76.77994 54.39064

76.05095 -77.16228 54.84161

75.64693 -77.52538 55.27412

75.25964 -77.86961 55.68879

74.88876 -78.19605 56.08594

74.5339 -78.50557 56.46601

74.19461 -78.79893 56.82949

73.87045 -79.0769 57.17686

73.56092 -79.34019 57.50863

73.26555 -79.5895 57.82531

72.98386 -79.82555 58.12742

72.71532 -80.04894 58.41547

72.45949 -80.26036 58.68999

72.2159 -80.46042 58.95144

71.98409 -80.64972 59.20034

71.76355 -80.82883 59.43719

71.55381 -80.99828 59.66248

71.35437 -81.15836 59.8768

71.16492 -81.30988 60.08043

70.98495 -81.45319 60.27393

70.81397 -81.58854 60.4578

70.65172 -81.71666 60.63235

70.49764 -81.83769 60.79813

70.35149 -81.95219 60.95542

70.21284 -82.06049 61.10466

70.08126 -82.16267 61.24632

69.95652 -82.25948 61.38064

69.8382 -82.35078 61.50809

69.72601 -82.43713 61.62894

69.61972 -82.51888 61.74348

69.5189 -82.59603 61.85212

69.42344 -82.66914 61.95501

69.33292 -82.73808 62.05263

69.2471 -82.80329 62.14513

69.16589 -82.8651 62.23272

69.08888 -82.9234 62.31581

69.01591 -82.97855 62.39454

68.94678 -83.03073 62.46915

68.88134 -83.08019 62.53981

68.81933 -83.12683 62.60685

68.76054 -83.17096 62.67039

68.70486 -83.21272 62.73063

68.65214 -83.25237 62.78759

68.60217 -83.28975 62.84172

68.55479 -83.32513 62.89304

68.50991 -83.35863 62.94167

68.46735 -83.39038 62.98777

68.42703 -83.42048 63.03145

68.38869 -83.44919 63.07272

68.35236 -83.47628 63.11192

68.31783 -83.50201 63.14902

68.28505 -83.52646 63.18417

68.25386 -83.54973 63.21743

68.22423 -83.57188 63.24891

68.19602 -83.59297 63.27868

68.16829 -83.61291 63.30566

68.14572 -83.62997 63.33691

68.12076 -83.64889 63.36116

68.09682 -83.6671 63.38377

68.07381 -83.68458 63.40474

68.0517 -83.70145 63.42412

68.03046 -83.71771 63.44202

68.00999 -83.73338 63.45851

67.99032 -83.7485 63.47363

67.97134 -83.76311 63.48751

67.95311 -83.7772 63.5002

67.93552 -83.7908 63.5118

67.91859 -83.80394 63.52239

67.90231 -83.81659 63.53207

67.8866 -83.82883 63.54086

67.8715 -83.84062 63.54886

67.85692 -83.85202 63.55614

67.84287 -83.86301 63.56278

67.82933 -83.87366 63.56876

67.81628 -83.88391 63.57419

67.8037 -83.89384 63.57912

67.79155 -83.9034 63.5836

67.77983 -83.91267 63.58763

67.76851 -83.92163 63.59126

67.75758 -83.9303 63.59454

67.747 -83.93867 63.59749

67.73678 -83.94679 63.60013

67.72688 -83.95467 63.6025

67.7173 -83.9623 63.60462

67.70802 -83.96968 63.60651

67.69904 -83.97685 63.6082

67.69032 -83.98381 63.60971

# section 8

XYZ

240

118.5719 1.097033 1.565779

118.5718 1.108611 1.567847

118.5717 1.120325 1.570856

118.5716 1.132114 1.574946

118.5715 1.143826 1.580233

118.5714 1.155237 1.587124

118.5709 1.165697 1.59624

118.5707 1.175311 1.606872

118.5704 1.183588 1.619309

118.57 1.190148 1.633456

118.5686 1.194097 1.64926

118.5673 1.195788 1.666089

118.5661 1.194544 1.683719

118.5641 1.189898 1.70157

118.5627 1.181331 1.718793

118.5608 1.168303 1.734246

118.5595 1.150943 1.747006

118.5579 1.130686 1.757527

118.5567 1.10926 1.767429

118.555 1.08727 1.777934

118.5539 1.064365 1.788989

118.5528 1.040301 1.800439

118.5515 1.015036 1.812388

118.5499 0.9884914 1.82483

118.5486 0.9606105 1.837832

118.547 0.9313617 1.851513

118.5456 0.9005723 1.865765

118.5436 0.8682207 1.880736

118.5418 0.8342205 1.896483

118.5399 0.7984673 1.913039

118.5383 0.7608609 1.93045

118.5362 0.721283 1.948774

118.5337 0.6796357 1.968076

118.5315 0.6357825 1.988396

118.5292 0.5895956 2.009793

118.5262 0.54094 2.032341

118.5238 0.4896749 2.056105

118.5207 0.4356453 2.081155

118.5174 0.3786871 2.107569

118.514 0.3186283 2.135411

118.5107 0.255307 2.164801

118.5065 0.188507 2.195791

118.5028 0.1180487 2.228499

118.4983 0.04370673 2.263007

118.4935 -0.034733977 2.299437

118.4884 -0.1175047 2.337892

118.4832 -0.2048606 2.378475

118.4774 -0.2970618 2.421329

118.4714 -0.3943729 2.466583

118.4652 -0.4970895 2.514361

118.4581 -0.6055186 2.564825

118.4505 -0.7199818 2.618103

118.4428 -0.8408054 2.674375

118.434 -0.9683437 2.733817

118.4249 -1.102969 2.796574

118.4148 -1.245072 2.862866

118.4039 -1.395061 2.932875

118.3923 -1.553352 3.006809

118.3804 -1.720414 3.084873

118.3669 -1.89669 3.167315

118.3526 -2.082668 3.254392

118.3371 -2.278867 3.346304

118.3205 -2.485818 3.443331

118.3027 -2.704077 3.545757

118.2832 -2.934224 3.653846

118.2624 -3.176832 3.767931

118.2395 -3.432547 3.88832

118.2152 -3.701998 4.015327

118.1885 -3.985838 4.149322

118.1598 -4.284771 4.290608

118.1289 -4.599546 4.439568

118.0952 -4.930813 4.596624

118.0589 -5.279334 4.762146

118.0191 -5.645926 4.936567

117.9766 -6.031309 5.120285

117.9301 -6.4363 5.313767

117.8795 -6.861712 5.517482

117.8248 -7.308347 5.731886

117.766 -7.777074 5.957419

117.7019 -8.268604 6.19469

117.6323 -8.783861 6.444143

117.5574 -9.323608 6.70631

117.4754 -9.888676 6.981734

117.3866 -10.47979 7.271026

117.2914 -11.09779 7.574643

117.1873 -11.74327 7.893296

117.075 -12.41701 8.227454

116.9536 -13.11969 8.577714

116.8216 -13.85161 8.944888

116.6789 -14.61351 9.329384

116.5247 -15.40595 9.731521

116.3582 -16.22953 10.15154

116.1786 -17.08464 10.58976

115.9855 -17.97167 11.04644

115.7779 -18.8907 11.52208

115.5543 -19.84173 12.01706

115.3142 -20.82473 12.53152

115.0568 -21.83955 13.06583

114.7811 -22.88579 13.62006

114.4865 -23.96296 14.19445

114.1713 -25.07045 14.78895

113.836 -26.20762 15.40357

113.4782 -27.37322 16.03827

113.0981 -28.56623 16.69285

112.695 -29.78548 17.36712

112.2674 -31.02927 18.06068

111.8158 -32.29627 18.77313

111.3409 -33.58532 19.50367

110.8393 -34.89285 20.25216

110.3112 -36.21766 21.01781

109.7583 -37.5575 21.79961

109.18 -38.91018 22.59678

108.5756 -40.27299 23.40819

107.9467 -41.64363 24.23289

107.2927 -43.01922 25.06973

106.6149 -44.39751 25.91733

105.9143 -45.77546 26.77452

105.1911 -47.15059 27.63991

104.4472 -48.52013 28.51184

103.683 -49.88157 29.38917

102.9011 -51.23225 30.27017

102.1016 -52.56923 31.1534

101.2864 -53.89017 32.03732

100.4557 -55.19138 32.92089

99.61133 -56.47089 33.8022

98.75983 -57.7297 34.67964

97.90587 -58.96795 35.55146

97.04638 -60.18022 36.41766

96.18548 -61.36544 37.27718

95.3237 -62.52053 38.1305

94.4599 -63.64072 38.97869

93.59825 -64.72659 39.81967

92.74316 -65.77988 40.65083

91.89383 -66.79731 41.47233

91.05392 -67.78096 42.28177

90.22486 -68.73027 43.0782

89.40792 -69.64414 43.86055

88.60383 -70.52274 44.62865

87.81559 -71.36775 45.38059

87.04243 -72.17831 46.11629

86.28733 -72.95522 46.83431

85.54973 -73.69946 47.53464

84.83026 -74.41059 48.21671

84.13085 -75.09086 48.87968

83.4512 -75.74014 49.52374

82.79204 -76.35983 50.1482

82.1533 -76.95073 50.75275

81.53544 -77.51337 51.33827

80.93845 -78.04886 51.9037

80.36201 -78.55807 52.4496

79.80647 -79.04253 52.97583

79.27124 -79.50201 53.48262

78.75699 -79.93959 53.97042

78.26263 -80.35394 54.43933

77.78809 -80.74747 54.8895

77.33267 -81.12077 55.32169

76.89661 -81.47447 55.73607

76.47873 -81.80984 56.13295

76.07906 -82.1272 56.51278

75.6972 -82.42838 56.87626

75.33215 -82.71307 57.22387

74.98347 -82.98254 57.55567

74.65067 -83.23806 57.87262

74.33366 -83.47962 58.17501

74.03149 -83.70806 58.46335

73.74323 -83.9239 58.73839

73.46936 -84.128 59.00015

73.2084 -84.32114 59.24958

72.95993 -84.50412 59.48674

72.72389 -84.677 59.71258

72.49928 -84.83988 59.92744

72.28627 -84.9942 60.1314

72.08388 -85.14028 60.32544

71.89112 -85.27782 60.50985

71.70869 -85.40821 60.68472

71.53555 -85.5315 60.85104

71.37094 -85.64771 61.00888

71.21494 -85.7577 61.15842

71.06661 -85.86152 61.30064

70.92667 -85.95994 61.43549

70.79332 -86.05256 61.56325

70.66712 -86.14001 61.68463

70.54741 -86.22327 61.79948

70.43423 -86.30158 61.90864

70.32697 -86.37531 62.01183

70.22478 -86.44543 62.10975

70.12831 -86.51167 62.20277

70.037 -86.57402 62.29065

69.95047 -86.63342 62.37403

69.86851 -86.68915 62.45305

69.79051 -86.74196 62.52794

69.71718 -86.79198 62.5989

69.64732 -86.8391 62.66645

69.58128 -86.88386 62.73029

69.51886 -86.92567 62.79082

69.45943 -86.96579 62.84807

69.40334 -87.0037 62.90274

69.35033 -87.03905 62.95436

69.30036 -87.07263 63.00353

69.25278 -87.10446 63.05017

69.20746 -87.13496 63.09418

69.16462 -87.16367 63.13597

69.12435 -87.19083 63.17574

69.08589 -87.21648 63.21341

69.04925 -87.24098 63.24913

69.01469 -87.26428 63.2832

68.98174 -87.28645 63.31527

68.95068 -87.3074 63.34585

68.91846 -87.32683 63.37142

68.89423 -87.3439 63.40439

68.86705 -87.36294 63.42975

68.84136 -87.38103 63.45375

68.81669 -87.39854 63.47639

68.79294 -87.41537 63.49745

68.77054 -87.43116 63.51704

68.74893 -87.44672 63.5352

68.72815 -87.46146 63.55201

68.70805 -87.4759 63.56755

68.68873 -87.49001 63.58167

68.67005 -87.50307 63.59468

68.65249 -87.51616 63.60666

68.63517 -87.52892 63.61772

68.61884 -87.54103 63.62763

68.60267 -87.5524 63.63676

68.58752 -87.56386 63.64514

68.57287 -87.57481 63.65263

68.55827 -87.5854 63.65945

68.54465 -87.59563 63.66571

68.53148 -87.60558 63.67123

68.51876 -87.61515 63.6765

68.50646 -87.62445 63.6811

68.49413 -87.63345 63.68506

68.4826 -87.64204 63.68888

68.47147 -87.65047 63.69236

68.4607 -87.65913 63.6953

68.45023 -87.66694 63.69796

68.44009 -87.67452 63.70036

68.43074 -87.68201 63.70253

68.42119 -87.68915 63.70449

68.41194 -87.69621 63.70628

pressure

SECTIONAL

8

# section 1

XYZ

240

49.3306 0.0098132947 -0.179808

49.33034 0.0019964783 -0.1786022

49.33057 -0.0059626806 -0.1768277

49.33054 -0.014041915 -0.1744389

49.33041 -0.022137532 -0.1712895

49.3309 -0.030213663 -0.1672961

49.33183 -0.038083676 -0.1622098

49.33272 -0.046208069 -0.1569143

49.33448 -0.054317098 -0.1509699

49.33629 -0.06269414 -0.1447786

49.33815 -0.071473278 -0.1383655

49.34132 -0.080435418 -0.1316441

49.34425 -0.089751661 -0.1246556

49.34717 -0.099447228 -0.1173802

49.35123 -0.1095509 -0.1097989

49.35421 -0.1201516 -0.1018441

49.35838 -0.1311241 -0.093603216

49.36273 -0.1425946 -0.084984839

49.36745 -0.154595 -0.075966693

49.37193 -0.1671537 -0.06652379

49.3773 -0.1803065 -0.056636747

49.38219 -0.1940814 -0.046261832

49.38798 -0.208523 -0.035379391

49.39355 -0.2236685 -0.023959979

49.39963 -0.2395652 -0.011981669

49.40573 -0.2562411 0.00061973371

49.41231 -0.2737519 0.013861567

49.41921 -0.2921465 0.027783681

49.42643 -0.311483 0.042414535

49.43422 -0.3318003 0.05783033

49.44233 -0.3531674 0.074053735

49.45082 -0.3756571 0.091120869

49.45995 -0.3993041 0.1091261

49.46925 -0.4241958 0.1280968

49.47924 -0.4504158 0.1480726

49.48967 -0.4780095 0.1691625

49.50082 -0.5070783 0.191407

49.51229 -0.5377234 0.214848

49.52452 -0.5699937 0.2396175

49.5373 -0.6040118 0.265755

49.55049 -0.6398781 0.293332

49.56478 -0.6776822 0.3224764

49.57974 -0.7175545 0.3532338

49.59588 -0.7595933 0.385754

49.61233 -0.8039499 0.4200798

49.63022 -0.8507121 0.4563918

49.64853 -0.900061 0.4947385

49.66816 -0.9521087 0.535299

49.68873 -1.007037 0.5781417

49.71025 -1.064966 0.6234743

49.73328 -1.126119 0.6713696

49.75714 -1.190613 0.7220422

49.78285 -1.258693 0.7755955

49.80949 -1.330511 0.8322183

49.83736 -1.406271 0.8921416

49.86726 -1.486222 0.9554699

49.89826 -1.570576 1.022437

49.93114 -1.659557 1.0933

49.96574 -1.753433 1.16819

50.00195 -1.852446 1.247376

50.04017 -1.956878 1.331125

50.0803 -2.067014 1.419655

50.12246 -2.183138 1.513216

50.1669 -2.305592 1.612111

50.21325 -2.43468 1.716641

50.26199 -2.570744 1.827091

50.31322 -2.714102 1.943773

50.36701 -2.86517 2.06704

50.42294 -3.024263 2.197203

50.48154 -3.191859 2.334657

50.54307 -3.368289 2.479712

50.60741 -3.554044 2.632802

50.67475 -3.749497 2.794304

50.74451 -3.955106 2.964664

50.81789 -4.171361 3.144227

50.89348 -4.398702 3.333465

50.97268 -4.637698 3.532804

51.05483 -4.8887 3.742721

51.13996 -5.152328 3.963647

51.22858 -5.429051 4.196113

51.32008 -5.719357 4.440502

51.41485 -6.02385 4.697402

51.51266 -6.342967 4.967142

51.61317 -6.677311 5.250356

51.71704 -7.027367 5.547439

51.82313 -7.393694 5.85886

51.93229 -7.776647 6.185125

52.04443 -8.176688 6.526968

52.15851 -8.594057 6.885059

52.27507 -9.029147 7.259883

52.39419 -9.482042 7.651994

52.51543 -9.953335 8.061921

52.63866 -10.44303 8.490074

52.76343 -10.95149 8.93696

52.88981 -11.47872 9.403146

53.01686 -12.02486 9.888884

53.14491 -12.58972 10.39462

53.27382 -13.1735 10.92075

53.40299 -13.77589 11.46747

53.53185 -14.39666 12.03513

53.6602 -15.03537 12.62389

53.78796 -15.69185 13.23385

53.9149 -16.36544 13.86499

54.03981 -17.0556 14.51744

54.16348 -17.76132 15.191

54.28485 -18.48187 15.88555

54.40434 -19.21675 16.60082

54.52096 -19.96452 17.33629

54.63474 -20.72419 18.09184

54.74548 -21.49482 18.86655

54.85405 -22.27533 19.6596

54.95828 -23.06346 20.47091

55.05928 -23.85847 21.29934

55.15679 -24.65884 22.1437

55.25119 -25.46282 23.00316

55.3417 -26.26945 23.87633

55.42948 -27.07694 24.76208

55.51374 -27.88377 25.65916

55.59488 -28.68834 26.56583

55.67288 -29.48926 27.48081

55.74849 -30.28474 28.40238

55.82114 -31.0739 29.32954

55.89074 -31.85445 30.26058

55.95831 -32.62532 31.19382

56.02319 -33.38684 32.12602

56.08624 -34.13907 33.05424

56.14685 -34.88036 33.97698

56.20337 -35.60894 34.89393

56.25637 -36.32502 35.80172

56.30573 -37.02809 36.69764

56.35275 -37.71773 37.5812

56.39768 -38.39257 38.45183

56.43981 -39.05128 39.30805

56.48071 -39.69291 40.14983

56.52056 -40.31805 40.9755

56.55881 -40.92503 41.78493

56.59644 -41.51346 42.57687

56.63359 -42.08329 43.35104

56.67039 -42.63437 44.10685

56.70748 -43.16598 44.8443

56.74401 -43.67868 45.56218

56.78133 -44.17252 46.25996

56.81887 -44.64714 46.9382

56.85667 -45.10291 47.59653

56.89463 -45.54013 48.23463

56.93312 -45.959 48.85195

56.97227 -46.36025 49.44895

57.01156 -46.74343 50.02645

57.05158 -47.10966 50.58319

57.09111 -47.45922 51.1199

57.13166 -47.79261 51.63712

57.17216 -48.11044 52.13465

57.21228 -48.41277 52.61325

57.25319 -48.7008 53.07281

57.29343 -48.97465 53.51394

57.33339 -49.23438 53.9371

57.37312 -49.48169 54.34254

57.41233 -49.71626 54.73098

57.45181 -49.93874 55.10194

57.48991 -50.1495 55.4573

57.52774 -50.34993 55.79681

57.56492 -50.53954 56.1209

57.60133 -50.71934 56.43021

57.63688 -50.88919 56.72572

57.67164 -51.05082 57.00703

57.7056 -51.20316 57.27536

57.73867 -51.34753 57.53076

57.77104 -51.48436 57.77394

57.8025 -51.61325 58.00547

57.83235 -51.73545 58.22552

57.86181 -51.85106 58.43507

57.88988 -51.96039 58.6341

57.91753 -52.06347 58.82291

57.94394 -52.16126 59.00301

57.96909 -52.25376 59.17346

57.99349 -52.34094 59.33567

58.01679 -52.42327 59.48906

58.0397 -52.50138 59.63515

58.06154 -52.57476 59.77383

58.08273 -52.64405 59.90509

58.10493 -52.7079 60.03051

58.12882 -52.76581 60.15067

58.16074 -52.81215 60.26667

58.20524 -52.84298 60.37991

58.26274 -52.85704 60.48875

58.32773 -52.85912 60.59023

58.39631 -52.85384 60.68393

58.46551 -52.84154 60.76656

58.53283 -52.82759 60.84143

58.59581 -52.8134 60.90891

58.66007 -52.79306 60.96843

58.71832 -52.7761 61.02342

58.77639 -52.75436 61.07143

58.83018 -52.73375 61.11539

58.88093 -52.71323 61.15582

58.92971 -52.69206 61.1916

58.97548 -52.6717 61.22538

59.01874 -52.65053 61.25454

59.06004 -52.62914 61.28115

59.09906 -52.60929 61.30634

59.13573 -52.58821 61.3279

59.17087 -52.56779 61.34781

59.20394 -52.54879 61.36712

59.23518 -52.52912 61.38273

59.26444 -52.50988 61.39697

59.29222 -52.49114 61.41021

59.31924 -52.47723 61.42835

59.34436 -52.45841 61.43772

59.36774 -52.4407 61.44627

59.38986 -52.42344 61.45433

59.41057 -52.40704 61.46082

59.43042 -52.39108 61.46742

59.44902 -52.37575 61.47308

59.46685 -52.36051 61.47826

59.48355 -52.34632 61.48285

59.49958 -52.33263 61.4873

59.5146 -52.31933 61.49057

59.52906 -52.30699 61.49407

59.54258 -52.29469 61.49692

59.55542 -52.28286 61.49961

59.56761 -52.27172 61.50194

59.57942 -52.26079 61.50396

59.59022 -52.25006 61.50569

59.60093 -52.23995 61.50714

59.61115 -52.23007 61.50837

59.62066 -52.22097 61.50962

59.62995 -52.21219 61.51065

59.63836 -52.20356 61.51128

59.64706 -52.19497 61.51197

59.65494 -52.1872 61.51252

59.66269 -52.17946 61.51294

59.67012 -52.17156 61.51324

59.67722 -52.16461 61.5132

59.68382 -52.15767 61.51328

59.69036 -52.15074 61.51374

59.69666 -52.14405 61.51342

59.70245 -52.1375 61.51324

59.70804 -52.1315 61.51324

59.71363 -52.12564 61.51295

59.71925 -52.11993 61.51283

# section 2

XYZ

240

56.3868 -0.047023728 -0.080230385

56.38678 -0.055165168 -0.079069145

56.38678 -0.063463464 -0.077332668

56.38675 -0.071896687 -0.074968435

56.38683 -0.080369756 -0.071834035

56.38709 -0.088854738 -0.067850873

56.38777 -0.097183481 -0.062791377

56.38865 -0.1057902 -0.057517566

56.39013 -0.1144313 -0.051611576

56.39189 -0.1233691 -0.04545369

56.39349 -0.1327256 -0.039081082

56.39589 -0.1423088 -0.032380827

56.39853 -0.1522768 -0.025409831

56.40137 -0.1626556 -0.018149531

56.40442 -0.1734724 -0.01058079

56.40733 -0.1848112 -0.0026494055

56.41094 -0.1965708 0.0055870395

56.41472 -0.2088644 0.014200619

56.41867 -0.2217236 0.023213938

56.42279 -0.2351821 0.032651089

56.42714 -0.2492777 0.042531841

56.43167 -0.2640416 0.052899305

56.43642 -0.2795175 0.063772306

56.44139 -0.2957478 0.075181253

56.44664 -0.3127819 0.087149054

56.45212 -0.3306541 0.099734634

56.45787 -0.3494226 0.1129591

56.46391 -0.3691401 0.1268605

56.47028 -0.3898672 0.141471

56.47695 -0.4116494 0.1568589

56.48396 -0.4345584 0.1730537

56.49135 -0.458667 0.1900904

56.49912 -0.4840261 0.2080563

56.50727 -0.5107216 0.2269832

56.51588 -0.5388398 0.2469133

56.52492 -0.5684409 0.2679494

56.53442 -0.5996259 0.2901298

56.54446 -0.632494 0.3135089

56.555 -0.6671214 0.3381998

56.56611 -0.7036242 0.3642523

56.57784 -0.7421148 0.3917396

56.59015 -0.7826914 0.4207784

56.60316 -0.8254935 0.4514225

56.61685 -0.870625 0.4838134

56.63127 -0.9182448 0.5180026

56.64646 -0.9684663 0.5541535

56.66247 -1.021466 0.5923221

56.67932 -1.077373 0.6326895

56.69709 -1.136378 0.6753222

56.71578 -1.198627 0.7204146

56.73549 -1.264329 0.7680517

56.75623 -1.333652 0.8184358

56.77808 -1.406816 0.871678

56.80107 -1.484029 0.9279594

56.82524 -1.565493 0.9874983

56.85071 -1.651469 1.050415

56.87749 -1.742192 1.116928

56.90562 -1.8379 1.187284

56.93521 -1.93889 1.261631

56.96632 -2.045432 1.340222

56.99895 -2.157808 1.423323

57.03324 -2.276342 1.511139

57.06923 -2.40135 1.603945

57.10698 -2.533166 1.702016

57.14656 -2.67214 1.805637

57.18802 -2.818635 1.915107

57.23142 -2.973028 2.030738

57.27684 -3.135714 2.152852

57.32432 -3.307101 2.28179

57.37392 -3.487611 2.417901

57.42568 -3.677684 2.561551

57.47966 -3.877772 2.713118

57.53589 -4.08834 2.872992

57.59442 -4.309867 3.041574

57.65526 -4.542846 3.219281

57.71844 -4.787784 3.406542

57.78397 -5.045196 3.603795

57.85183 -5.315612 3.81149

57.92208 -5.599571 4.030057

57.99451 -5.897604 4.26004

58.06919 -6.210263 4.501866

58.14609 -6.5381 4.756011

58.22514 -6.88167 5.022944

58.30603 -7.241523 5.303219

58.38894 -7.618206 5.597229

58.47341 -8.012249 5.905565

58.55959 -8.424158 6.228613

58.64692 -8.854284 6.567165

58.73548 -9.302935 6.92183

58.82515 -9.770449 7.293184

58.91575 -10.2572 7.681692

59.00701 -10.76349 8.087883

59.09864 -11.28956 8.512253

59.19037 -11.83561 8.955282

59.28183 -12.40176 9.417422

59.37268 -12.98808 9.899098

59.46263 -13.59455 10.4007

59.55127 -14.22109 10.92257

59.63823 -14.86752 11.46501

59.72311 -15.53355 12.02827

59.80555 -16.21885 12.61255

59.88514 -16.92293 13.21797

59.96151 -17.64524 13.84461

60.03428 -18.38511 14.49244

60.1031 -19.14177 15.16138

60.16763 -19.91435 15.85124

60.22755 -20.70186 16.56176

60.2826 -21.50325 17.29258

60.33253 -22.31733 18.04325

60.37714 -23.14285 18.8132

60.4169 -23.97893 19.60124

60.45027 -24.82317 20.40778

60.47793 -25.6746 21.23132

60.49989 -26.53168 22.07092

60.51618 -27.39283 22.92549

60.52686 -28.25644 23.79389

60.53212 -29.1209 24.67487

60.53212 -29.98456 25.56708

60.52705 -30.84579 26.46911

60.51712 -31.70298 27.37947

60.50265 -32.55453 28.29666

60.48404 -33.39887 29.21909

60.46118 -34.23403 30.14565

60.43419 -35.05863 31.07454

60.40416 -35.87307 32.00257

60.37175 -36.67709 32.92715

60.33666 -37.46902 33.84703

60.29768 -38.24576 34.76232

60.25583 -39.00751 35.67017

60.21167 -39.75366 36.56886

60.16602 -40.4836 37.45689

60.11892 -41.1957 38.33368

60.07116 -41.88996 39.19743

60.02302 -42.56506 40.04764

59.9751 -43.22109 40.88281

59.92762 -43.85718 41.70234

59.88099 -44.4733 42.50516

59.83556 -45.06917 43.29052

59.79147 -45.64463 44.0578

59.7491 -46.19944 44.80651

59.70858 -46.73399 45.5359

59.67008 -47.24829 46.24565

59.63376 -47.74251 46.93538

59.59962 -48.21676 47.60494

59.56781 -48.6716 48.254

59.53829 -49.10728 48.88247

59.51112 -49.52425 49.49032

59.48626 -49.92278 50.07771

59.46367 -50.30359 50.64451

59.4432 -50.66711 51.19099

59.42501 -51.01367 51.71744

59.40872 -51.34411 52.22392

59.39445 -51.65871 52.71093

59.382 -51.95826 53.17861

59.3713 -52.24308 53.62756

59.36222 -52.51389 54.05803

59.35464 -52.77131 54.47046

59.34844 -53.01567 54.86539

59.34355 -53.24767 55.24323

59.33984 -53.46783 55.6045

59.3371 -53.67673 55.94963

59.33539 -53.87473 56.27928

59.33457 -54.06241 56.59387

59.33452 -54.24025 56.89394

59.33513 -54.40873 57.17997

59.33633 -54.56829 57.45253

59.33807 -54.71938 57.71211

59.34025 -54.86241 57.95921

59.34292 -54.99769 58.19439

59.34582 -55.12577 58.41805

59.34901 -55.24697 58.6307

59.3524 -55.36163 58.83281

59.35605 -55.47002 59.02491

59.35979 -55.57258 59.20733

59.36363 -55.66961 59.38055

59.36758 -55.76127 59.54505

59.37152 -55.84802 59.70115

59.37547 -55.93006 59.84924

59.37967 -56.00739 59.98989

59.38405 -56.08034 60.12333

59.38976 -56.14811 60.25043

59.39764 -56.2102 60.37177

59.41224 -56.26266 60.48884

59.43746 -56.30186 60.60238

59.47418 -56.32658 60.7115

59.5179 -56.34066 60.81433

59.56581 -56.34665 60.9101

59.61732 -56.34465 60.99749

59.66845 -56.33939 61.07819

59.71877 -56.33139 61.15237

59.77074 -56.31744 61.21893

59.81951 -56.30418 61.28117

59.86889 -56.28635 61.33648

59.91596 -56.26825 61.38744

59.96103 -56.24993 61.43459

60.00485 -56.22987 61.4768

60.04641 -56.21065 61.51648

60.08682 -56.18956 61.55124

60.12536 -56.16863 61.58314

60.16187 -56.14885 61.61336

60.1971 -56.12772 61.63939

60.23064 -56.10702 61.66325

60.26228 -56.08796 61.6865

60.29275 -56.06759 61.70573

60.32168 -56.04776 61.72329

60.34917 -56.02851 61.73936

60.37503 -56.01449 61.76086

60.39994 -55.99536 61.77274

60.42358 -55.97687 61.78353

60.44598 -55.95905 61.79333

60.46722 -55.94188 61.80222

60.48736 -55.92537 61.81028

60.50648 -55.90945 61.81758

60.52462 -55.89414 61.82418

60.54186 -55.87938 61.83015

60.55822 -55.8652 61.83553

60.57376 -55.85157 61.84038

60.58854 -55.83846 61.84476

60.60261 -55.82586 61.84871

60.61599 -55.81373 61.85227

60.62872 -55.80207 61.85545

60.64086 -55.79086 61.85831

60.65242 -55.78007 61.86088

60.66345 -55.76969 61.86317

60.67396 -55.7597 61.86522

60.68401 -55.75009 61.86705

60.69361 -55.74083 61.86868

60.70279 -55.73191 61.8701

60.71157 -55.72331 61.87138

60.71998 -55.71502 61.87249

60.72803 -55.70702 61.87348

60.73576 -55.69929 61.87433

60.74316 -55.69184 61.87508

60.75028 -55.68464 61.87571

60.75713 -55.67768 61.87626

60.76371 -55.67094 61.87671

60.77004 -55.66443 61.87709

60.77613 -55.6581 61.8774

60.78202 -55.65198 61.87764

60.7877 -55.64604 61.87783

# section 3

XYZ

240

65.93896 -0.1239676 0.054575272

65.93895 -0.1325481 0.055675477

65.93894 -0.1413055 0.057360139

65.9389 -0.150218 0.059691358

65.93896 -0.1592025 0.062805355

65.93916 -0.1682397 0.06677451

65.93969 -0.1771901 0.071798101

65.94038 -0.1864491 0.077041388

65.94157 -0.1958116 0.082895778

65.94296 -0.2055082 0.089008823

65.94423 -0.2156454 0.095326647

65.94614 -0.2260704 0.1019982

65.94826 -0.2369206 0.1089452

65.95052 -0.2482233 0.1161852

65.95295 -0.2600076 0.1237371

65.95528 -0.2723445 0.1316367

65.95816 -0.2851696 0.139867

65.96117 -0.2985764 0.1484743

65.96432 -0.3125996 0.1574807

65.96761 -0.327276 0.1669103

65.97108 -0.342649 0.1767824

65.97471 -0.3587481 0.1871393

65.97849 -0.3756243 0.1979999

65.98244 -0.3933238 0.2093944

65.98663 -0.4118994 0.2213487

65.99098 -0.431392 0.2339127

65.99556 -0.4518633 0.2471129

66.00036 -0.4733708 0.260987

66.00542 -0.4959796 0.2755696

66.01073 -0.5197441 0.2909209

66.0163 -0.5447395 0.3070749

66.02216 -0.571043 0.3240698

66.02832 -0.5987182 0.3419825

66.03479 -0.6278543 0.3608506

66.04163 -0.6585423 0.38072

66.0488 -0.6908576 0.401681

66.05632 -0.7249052 0.4237786

66.06427 -0.7607906 0.4470698

66.07261 -0.7986065 0.4716567

66.08139 -0.8384745 0.4975948

66.09068 -0.8805164 0.5249583

66.10039 -0.9248461 0.5538542

66.11066 -0.9716097 0.5843454

66.12147 -1.020931 0.6165596

66.13283 -1.072972 0.6505597

66.14478 -1.127872 0.6864937

66.15739 -1.185812 0.7244298

66.17062 -1.246944 0.7645319

66.18459 -1.31147 0.8068794

66.19926 -1.37956 0.8516488

66.21468 -1.451432 0.8989367

66.23091 -1.527283 0.9489304

66.24799 -1.607347 1.001749

66.26594 -1.691854 1.057566

66.28477 -1.781033 1.116587

66.3046 -1.875164 1.178942

66.32541 -1.974507 1.244841

66.34721 -2.079332 1.314516

66.37011 -2.189955 1.388126

66.39414 -2.306677 1.465915

66.4193 -2.429814 1.548136

66.44566 -2.559717 1.634997

66.47327 -2.696734 1.726766

66.50213 -2.841233 1.823708

66.53234 -2.9936 1.926107

66.56387 -3.154233 2.034252

66.59676 -3.323548 2.14845

66.63107 -3.501977 2.269019

66.66679 -3.689967 2.396289

66.70398 -3.887981 2.530606

66.74259 -4.096501 2.672328

66.78268 -4.316018 2.821827

66.82421 -4.547043 2.979487

66.8672 -4.790098 3.145705

66.91161 -5.045719 3.320892

66.95743 -5.314456 3.505473

67.00462 -5.59687 3.699881

67.05311 -5.893531 3.904564

67.10291 -6.205025 4.119951

67.15373 -6.531917 4.346583

67.20561 -6.874801 4.584888

67.25846 -7.23427 4.835353

67.31216 -7.610917 5.098453

67.3663 -8.005304 5.374744

67.42101 -8.418031 5.664634

67.47578 -8.849621 5.968746

67.53069 -9.30064 6.287458

67.58507 -9.77146 6.621543

67.63895 -10.26246 6.971592

67.69203 -10.774 7.338203

67.74409 -11.30648 7.72184

67.79478 -11.86022 8.123023

67.84377 -12.43549 8.542252

67.8907 -13.03249 8.980011

67.93516 -13.65135 9.436754

67.97668 -14.29213 9.912913

68.01484 -14.9548 10.40888

68.04916 -15.63926 10.92501

68.0792 -16.3453 11.46161

68.1045 -17.07263 12.01894

68.1246 -17.82084 12.59719

68.13902 -18.58943 13.19651

68.14731 -19.37777 13.81697

68.14904 -20.18513 14.45855

68.1438 -21.01066 15.12117

68.1312 -21.85343 15.80467

68.11085 -22.71235 16.50879

68.08248 -23.58626 17.23316

68.04583 -24.47389 17.97734

68.00065 -25.37387 18.74079

67.94762 -26.28527 19.52229

67.88483 -27.2054 20.32229

67.81319 -28.13325 21.13929

67.73275 -29.06715 21.97234

67.64361 -30.00539 22.82038

67.54588 -30.94621 23.68225

67.43983 -31.88783 24.55673

67.32563 -32.82845 25.44248

67.20375 -33.7663 26.33813

67.07464 -34.69965 27.24224

66.93872 -35.62682 28.15322

66.7965 -36.54612 29.06945

66.6479 -37.45527 29.98989

66.49329 -38.35264 30.91292

66.33459 -39.23863 31.83545

66.17307 -40.11292 32.75502

66.00863 -40.97332 33.67076

65.84016 -41.81542 34.58383

65.66998 -42.6391 35.49218

65.49892 -43.4433 36.39444

65.32771 -44.22773 37.28846

65.15657 -44.99066 38.17357

64.98663 -45.73279 39.04736

64.81812 -46.45272 39.90919

64.65184 -47.15097 40.75712

64.48801 -47.82663 41.59046

64.32723 -48.48007 42.40778

64.16991 -49.11106 43.20824

64.01625 -49.71965 43.99099

63.86666 -50.30571 44.75539

63.72134 -50.86982 45.50057

63.58051 -51.41206 46.22607

63.44433 -51.93276 46.93143

63.31287 -52.43211 47.61641

63.18629 -52.91081 48.28058

63.0646 -53.36921 48.9238

62.94784 -53.8078 49.54603

62.83596 -54.22691 50.14737

62.72897 -54.62738 50.72766

62.62672 -55.00969 51.28713

62.52929 -55.37419 51.8261

62.43639 -55.72179 52.3446

62.34802 -56.05284 52.84311

62.26402 -56.36814 53.32178

62.18427 -56.66806 53.78122

62.1086 -56.95335 54.22169

62.03688 -57.22465 54.64364

61.96894 -57.48232 55.04762

61.90465 -57.72709 55.43407

61.84386 -57.9595 55.8035

61.78634 -58.18014 56.1564

61.73202 -58.38939 56.49338

61.68073 -58.58785 56.81491

61.63232 -58.77604 57.12156

61.58662 -58.95442 57.41381

61.5435 -59.12347 57.69226

61.50285 -59.28365 57.95741

61.4645 -59.43538 58.20978

61.42841 -59.57899 58.44992

61.39434 -59.71505 58.67828

61.36223 -59.84386 58.89536

61.33197 -59.9658 59.10166

61.30349 -60.08115 59.2977

61.27663 -60.19035 59.48387

61.25132 -60.2937 59.66062

61.22749 -60.39141 59.82845

61.20501 -60.48391 59.98768

61.18383 -60.57142 60.13876

61.16405 -60.65406 60.28218

61.14556 -60.73214 60.41825

61.12905 -60.80522 60.54763

61.11502 -60.87314 60.67088

61.1064 -60.93351 60.78913

61.10574 -60.984 60.90309

61.11399 -61.02339 61.01268

61.12887 -61.05341 61.11712

61.14913 -61.07508 61.21627

61.17629 -61.08661 61.31014

61.20572 -61.09311 61.3984

61.23849 -61.09367 61.48155

61.27402 -61.08813 61.55793

61.31019 -61.08013 61.62975

61.3477 -61.06768 61.69511

61.38567 -61.05284 61.7556

61.42259 -61.03731 61.81179

61.4602 -61.01882 61.86263

61.49592 -61.00109 61.91046

61.5322 -60.98051 61.95277

61.56726 -60.95985 61.99174

61.60038 -60.94038 62.02864

61.63347 -60.91899 62.0607

61.66523 -60.89789 62.09015

61.69496 -60.8786 62.11881

61.72453 -60.85759 62.14272

61.7528 -60.8371 62.16463

61.77982 -60.81717 62.18472

61.80389 -60.80283 62.21077

61.82896 -60.78293 62.22602

61.85287 -60.76366 62.23984

61.87562 -60.7451 62.2524

61.8973 -60.72719 62.26378

61.91795 -60.70996 62.27414

61.93761 -60.69335 62.28355

61.95633 -60.67738 62.2921

61.97418 -60.66198 62.29987

61.99116 -60.64718 62.30693

62.00735 -60.63295 62.31337

62.02277 -60.61929 62.31924

62.03748 -60.60615 62.32458

62.0515 -60.59351 62.32944

62.06487 -60.58138 62.33388

62.07764 -60.56969 62.33791

62.08984 -60.55846 62.34161

62.10148 -60.54766 62.34497

62.11261 -60.53727 62.34803

62.12326 -60.52728 62.35083

62.13345 -60.51764 62.35339

62.1432 -60.50837 62.35572

62.15255 -60.49944 62.35784

62.1615 -60.49082 62.35978

62.1701 -60.48252 62.36155

62.17835 -60.47451 62.36316

62.18627 -60.46677 62.36463

62.1939 -60.4593 62.36597

62.20123 -60.45208 62.3672

62.20829 -60.4451 62.36831

62.2151 -60.43834 62.36932

62.22166 -60.43179 62.37024

62.22799 -60.42545 62.37108

62.23412 -60.41929 62.37184

# section 4

XYZ

240

77.66025 -0.2183841 0.2199931

77.66022 -0.2275034 0.2210184

77.66022 -0.2368242 0.2226394

77.66017 -0.2463246 0.2249302

77.66019 -0.2559367 0.2280191

77.66034 -0.2656516 0.2319711

77.66069 -0.2753649 0.2369506

77.66115 -0.2854242 0.2421564

77.66196 -0.295672 0.2479475

77.66291 -0.3062997 0.2540055

77.66377 -0.3173948 0.2602561

77.66508 -0.3288527 0.2668924

77.66656 -0.3407855 0.27381

77.66812 -0.3532219 0.2810251

77.6698 -0.3661933 0.2885564

77.6714 -0.3797552 0.2964169

77.67338 -0.3938876 0.3046397

77.67545 -0.4086604 0.3132392

77.67764 -0.4241119 0.3222373

77.6799 -0.4402828 0.3316576

77.68228 -0.4572232 0.3415189

77.68478 -0.4749608 0.351863

77.68739 -0.4935553 0.3627084

77.69009 -0.5130575 0.374085

77.69297 -0.5335248 0.3860227

77.69595 -0.5550057 0.3985603

77.69907 -0.5775664 0.4117307

77.70235 -0.6012705 0.4255714

77.70583 -0.6261883 0.4401198

77.70945 -0.6523851 0.455426

77.71324 -0.6799409 0.4715299

77.71725 -0.7089376 0.4884737

77.72144 -0.7394547 0.5063209

77.72585 -0.7715856 0.525117

77.7305 -0.8054273 0.5449119

77.73537 -0.8410731 0.5657806

77.74046 -0.8786331 0.5877765

77.74584 -0.9182209 0.6109601

77.75149 -0.9599497 0.6354194

77.75743 -1.003947 0.6612171

77.76372 -1.050347 0.6884287

77.77023 -1.099282 0.7171491

77.77715 -1.150906 0.7474527

77.78442 -1.205368 0.7794499

77.79201 -1.262836 0.8132179

77.80001 -1.323476 0.8488858

77.80843 -1.387477 0.8865371

77.81723 -1.455022 0.9263134

77.82651 -1.526322 0.9683108

77.83624 -1.601579 1.012684

77.84644 -1.681023 1.059543

77.85712 -1.764884 1.109058

77.86835 -1.853414 1.161356

77.88012 -1.946871 1.216605

77.89238 -2.045519 1.274989

77.9053 -2.149656 1.336656

77.91877 -2.259576 1.401801

77.9328 -2.375588 1.47064

77.9475 -2.498031 1.543346

77.96284 -2.627246 1.620149

77.97883 -2.763589 1.701291

77.99546 -2.907441 1.786982

78.01278 -3.059194 1.877476

78.03076 -3.219257 1.973035

78.04945 -3.388058 2.073933

78.06879 -3.566039 2.180452

78.08879 -3.753664 2.292893

78.10947 -3.951412 2.411564

78.13079 -4.159775 2.536788

78.15272 -4.379269 2.668904

78.17521 -4.610423 2.80826

78.19823 -4.853783 2.955221

78.22176 -5.10991 3.110165

78.24567 -5.37938 3.273482

78.26991 -5.662783 3.445577

78.29443 -5.960725 3.626867

78.31911 -6.273819 3.817786

78.34383 -6.602685 4.018772

78.36853 -6.947968 4.230258

78.39285 -7.31027 4.452777

78.41675 -7.690245 4.686761

78.44008 -8.088529 4.932712

78.46268 -8.505763 5.191108

78.48399 -8.942527 5.462511

78.50412 -9.399482 5.747344

78.52242 -9.877145 6.046274

78.53897 -10.37615 6.359664

78.55293 -10.89691 6.688269

78.56422 -11.43987 7.032654

78.57243 -12.00544 7.393445

78.57719 -12.59404 7.771104

78.57809 -13.206 8.166141

78.57475 -13.84164 8.579062

78.56672 -14.50116 9.010352

78.5535 -15.1847 9.460475

78.53448 -15.8923 9.929865

78.5091 -16.62394 10.41892

78.47678 -17.37947 10.92801

78.43698 -18.15867 11.45744

78.38915 -18.96121 12.00748

78.33274 -19.78662 12.57835

78.26719 -20.63435 13.17017

78.19196 -21.50372 13.78304

78.10654 -22.39389 14.41696

78.01039 -23.30395 15.07184

77.90314 -24.23284 15.74753

77.78429 -25.17938 16.44378

77.65359 -26.1423 17.16024

77.51067 -27.12017 17.89647

77.35532 -28.1115 18.65192

77.18844 -29.11534 19.42541

77.00764 -30.12859 20.21738

76.81416 -31.15021 21.02635

76.60807 -32.17838 21.85137

76.38955 -33.21121 22.69139

76.15881 -34.24678 23.54526

75.91614 -35.2831 24.41176

75.66183 -36.31814 25.28958

75.39661 -37.35 26.17741

75.12127 -38.37682 27.07385

74.83631 -39.39678 27.97721

74.54241 -40.40806 28.88583

74.2395 -41.40801 29.79876

73.92832 -42.39467 30.71458

73.61172 -43.36845 31.63037

73.29177 -44.32896 32.5438

72.96861 -45.27338 33.45445

72.64124 -46.19568 34.3648

72.31358 -47.09537 35.27375

71.98679 -47.97079 36.1804

71.66152 -48.82209 37.08178

71.33818 -49.64739 37.9771

71.01829 -50.44825 38.8632

70.70209 -51.22318 39.73929

70.39057 -51.97324 40.60287

70.08399 -52.69746 41.45316

69.78314 -53.39669 42.28827

69.48852 -54.07079 43.10726

69.20042 -54.72003 43.90899

68.91924 -55.34445 44.69266

68.64532 -55.94481 45.4572

68.37891 -56.52134 46.20203

68.12022 -57.07454 46.92658

67.86932 -57.60468 47.63049

67.62646 -58.11267 48.31318

67.39166 -58.59894 48.97451

67.16497 -59.06406 49.61437

66.9463 -59.50842 50.23284

66.73576 -59.93303 50.82967

66.53317 -60.33839 51.40509

66.33849 -60.7249 51.95944

66.15159 -61.09359 52.49268

65.97227 -61.44479 53.0053

65.80048 -61.77945 53.49747

65.63599 -62.09787 53.96977

65.47861 -62.40092 54.42251

65.3282 -62.68927 54.85612

65.1845 -62.96326 55.27121

65.04733 -63.22371 55.66823

64.9165 -63.47113 56.0477

64.79173 -63.70618 56.41011

64.67286 -63.92923 56.75609

64.55966 -64.14094 57.08614

64.4519 -64.34182 57.40085

64.34937 -64.53236 57.70074

64.25187 -64.71306 57.98642

64.1592 -64.88438 58.2584

64.07113 -65.04679 58.51723

63.98748 -65.20063 58.76348

63.90802 -65.34647 58.99759

63.83261 -65.48462 59.22011

63.76106 -65.61549 59.43154

63.69315 -65.73937 59.63244

63.62874 -65.85673 59.82319

63.56767 -65.96783 60.00427

63.50974 -66.07298 60.17618

63.45485 -66.17253 60.33927

63.40283 -66.26675 60.49402

63.35361 -66.35591 60.64084

63.30706 -66.44027 60.78012

63.26329 -66.51988 60.91231

63.22239 -66.59496 61.0379

63.18526 -66.66502 61.15758

63.15283 -66.72935 61.27209

63.12616 -66.78675 61.38223

63.10566 -66.83632 61.48866

63.09198 -66.87724 61.59195

63.08926 -66.90536 61.69378

63.09208 -66.92631 61.79132

63.1033 -66.93736 61.88546

63.11867 -66.94215 61.97389

63.13937 -66.94061 62.05748

63.16232 -66.93475 62.13517

63.18911 -66.92391 62.20734

63.21603 -66.91182 62.27464

63.24603 -66.89526 62.33605

63.27457 -66.87935 62.3939

63.3058 -66.85941 62.44548

63.33657 -66.83906 62.49311

63.36553 -66.81998 62.53823

63.396 -66.79825 62.57768

63.4256 -66.77668 62.61398

63.45296 -66.75712 62.64928

63.48143 -66.73532 62.67894

63.50888 -66.714 62.70619

63.53534 -66.69324 62.73121

63.55722 -66.67849 62.76284

63.58247 -66.65764 62.78222

63.6067 -66.63744 62.79977

63.6299 -66.61797 62.8157

63.65213 -66.59914 62.83015

63.67339 -66.58105 62.84332

63.69372 -66.56358 62.85532

63.71315 -66.5468 62.86625

63.73174 -66.53061 62.87625

63.74949 -66.51505 62.8854

63.76645 -66.5001 62.89375

63.78266 -66.48574 62.90144

63.79817 -66.47196 62.9085

63.81298 -66.45869 62.91497

63.82714 -66.44596 62.92094

63.84069 -66.43371 62.92643

63.85365 -66.42193 62.9315

63.86606 -66.41062 62.93616

63.87794 -66.39973 62.94047

63.88932 -66.38926 62.94447

63.90023 -66.37917 62.94817

63.91069 -66.36947 62.95158

63.92073 -66.36014 62.95475

63.93036 -66.35112 62.9577

63.93962 -66.34245 62.96043

63.94851 -66.33408 62.96298

63.95707 -66.32599 62.96535

63.96531 -66.31819 62.96755

63.97325 -66.31067 62.96961

63.98091 -66.30338 62.97153

63.98829 -66.29631 62.97331

63.99542 -66.28948 62.97498

64.00232 -66.28288 62.97656

64.00898 -66.27645 62.97802

# section 5

XYZ

240

90.2598 -0.022245731 0.5368385

90.2598 -0.032077167 0.5380608

90.25983 -0.042125583 0.5399131

90.25979 -0.052383132 0.5424429

90.2598 -0.062808678 0.5457303

90.2599 -0.073399946 0.5498322

90.26009 -0.084102087 0.5548377

90.26032 -0.095195659 0.560067

90.26078 -0.1065733 0.5658124

90.26128 -0.1183853 0.5718198

90.26174 -0.1307019 0.578025

90.26247 -0.1434609 0.584604

90.26328 -0.1567518 0.5914661

90.26412 -0.1706088 0.5986257

90.26504 -0.1850638 0.6061025

90.26591 -0.2001686 0.613896

90.26698 -0.2159286 0.6220666

90.2681 -0.2324028 0.6306118

90.26928 -0.2496345 0.639553

90.27052 -0.2676693 0.6489134

90.27181 -0.2865615 0.6587117

90.27316 -0.3063488 0.6689875

90.27454 -0.3270926 0.6797605

90.27601 -0.3488501 0.6910604

90.27754 -0.3716834 0.7029185

90.2791 -0.3956545 0.7153664

90.28075 -0.4208292 0.728443

90.28249 -0.4472811 0.7421839

90.28434 -0.4750862 0.7566283

90.28624 -0.5043234 0.7718199

90.28823 -0.5350775 0.787802

90.29033 -0.56744 0.8046182

90.2925 -0.6015037 0.8223253

90.29479 -0.637368 0.8409727

90.29722 -0.6751418 0.8606117

90.29975 -0.7149339 0.8813092

90.30237 -0.7568638 0.9031228

90.30511 -0.8010598 0.9261127

90.30801 -0.8476472 0.9503627

90.31103 -0.89677 0.9759364

90.31423 -0.9485754 1.00291

90.31748 -1.003219 1.031371

90.32098 -1.060863 1.061401

90.32459 -1.121681 1.0931

90.32835 -1.18586 1.126551

90.33228 -1.253584 1.161875

90.33641 -1.325064 1.199162

90.34064 -1.400509 1.238541

90.34512 -1.480149 1.280117

90.34977 -1.564214 1.324033

90.35458 -1.652963 1.370404

90.35956 -1.746649 1.419392

90.36475 -1.845555 1.471128

90.37016 -1.949969 1.525773

90.37563 -2.060192 1.583504

90.38144 -2.176549 1.644475

90.38734 -2.299375 1.708872

90.39335 -2.429013 1.776908

90.39954 -2.565842 1.848755

90.40591 -2.710242 1.924639

90.41237 -2.862612 2.004794

90.41895 -3.023378 2.08943

90.4256 -3.192978 2.178798

90.43227 -3.371867 2.273154

90.43899 -3.560523 2.37277

90.44563 -3.75944 2.477922

90.45222 -3.969134 2.588906

90.45869 -4.190138 2.706029

90.46497 -4.423002 2.829609

90.47097 -4.668296 2.95998

90.4766 -4.926609 3.097489

90.48177 -5.198547 3.242497

90.48639 -5.484734 3.395381

90.4903 -5.785806 3.556528

90.49335 -6.102417 3.726342

90.49549 -6.435233 3.905243

90.49646 -6.784935 4.093664

90.49609 -7.1522 4.292045

90.49429 -7.537743 4.500818

90.49059 -7.942214 4.720531

90.48486 -8.366336 4.951618

90.47688 -8.810801 5.194587

90.46645 -9.276305 5.449938

90.45281 -9.763461 5.718251

90.4361 -10.27301 5.999951

90.4155 -10.80547 6.295748

90.39102 -11.36154 6.606018

90.36168 -11.94166 6.93152

90.32732 -12.54637 7.272807

90.28731 -13.17609 7.630502

90.24116 -13.83128 8.005042

90.18839 -14.51236 8.396891

90.12856 -15.21966 8.806527

90.0611 -15.95341 9.234434

89.9854 -16.71375 9.681067

89.90067 -17.5007 10.14687

89.80624 -18.31421 10.63225

89.70139 -19.1541 11.13758

89.58544 -20.02011 11.66315

89.45777 -20.91186 12.20923

89.31774 -21.82883 12.77602

89.16462 -22.77036 13.36368

88.99783 -23.73569 13.97226

88.81676 -24.72386 14.60178

88.62076 -25.73385 15.25214

88.4094 -26.76445 15.92318

88.18217 -27.81434 16.61466

87.93876 -28.88208 17.3262

87.67878 -29.96607 18.05737

87.402 -31.06463 18.80761

87.1096 -32.1767 19.57573

86.79869 -33.29876 20.36216

86.47083 -34.42966 21.16541

86.12621 -35.56736 21.98453

85.76509 -36.70973 22.81847

85.38779 -37.85461 23.66607

84.99474 -38.99975 24.52611

84.5863 -40.14282 25.39733

84.16353 -41.28177 26.27837

83.72756 -42.41461 27.16779

83.27912 -43.53927 28.06393

82.81905 -44.65363 28.96512

82.34741 -45.75473 29.87043

81.86518 -46.84031 30.77851

81.37625 -47.91092 31.68653

80.88338 -48.96621 32.59229

80.38687 -50.00294 33.49548

79.8852 -51.01429 34.39879

79.38338 -52.0002 35.30124

78.88271 -52.95852 36.20228

78.3842 -53.88914 37.09909

77.8884 -54.79003 37.99094

77.3975 -55.66322 38.87435

76.91187 -56.50699 39.74861

76.43298 -57.32263 40.61108

75.96117 -58.10903 41.46101

75.49766 -58.8673 42.2964

75.04313 -59.59735 43.11623

74.59811 -60.29953 43.91933

74.16312 -60.97393 44.70486

73.73878 -61.62147 45.47169

73.32542 -62.24244 46.2192

72.92342 -62.8375 46.94674

72.53292 -63.40697 47.65395

72.1543 -63.95196 48.34019

71.78767 -64.47298 49.00525

71.43309 -64.97072 49.64901

71.09052 -65.44563 50.27151

70.76009 -65.8989 50.87247

70.44165 -66.33114 51.45207

70.13508 -66.74277 52.01065

69.8403 -67.13504 52.54814

69.55705 -67.50826 53.06501

69.28524 -67.86356 53.56139

69.02457 -68.20129 54.03788

68.77478 -68.52238 54.49475

68.5357 -68.82764 54.93242

68.30692 -69.11743 55.35149

68.08822 -69.39265 55.7524

67.87933 -69.65392 56.13567

67.67989 -69.90193 56.50177

67.4896 -70.1371 56.85133

67.30814 -70.36013 57.18489

67.13519 -70.57159 57.50298

66.97044 -70.77205 57.80614

66.81358 -70.96204 58.09496

66.66432 -71.14207 58.36997

66.52232 -71.31264 58.63171

66.38728 -71.4741 58.88076

66.25892 -71.6271 59.11757

66.13698 -71.77199 59.34267

66.02114 -71.90916 59.55658

65.91111 -72.03893 59.75985

65.80667 -72.16182 59.95286

65.70755 -72.27812 60.13611

65.61346 -72.38812 60.3101

65.52426 -72.49226 60.47517

65.43964 -72.59076 60.63181

65.35944 -72.68401 60.7804

65.28344 -72.77226 60.92134

65.21146 -72.85569 61.05503

65.14338 -72.93471 61.18188

65.07919 -73.00954 61.30233

65.01904 -73.08012 61.41705

64.96366 -73.14571 61.52692

64.91393 -73.20509 61.63288

64.87076 -73.2573 61.73566

64.83768 -73.29885 61.83709

64.81092 -73.33362 61.93486

64.79314 -73.35904 62.03016

64.78085 -73.3783 62.12141

64.7761 -73.39004 62.20943

64.77553 -73.39691 62.29308

64.78166 -73.39709 62.37312

64.78983 -73.395 62.44852

64.80416 -73.38663 62.51971

64.81805 -73.37844 62.5868

64.83801 -73.36417 62.64868

64.859 -73.34868 62.70633

64.87857 -73.33431 62.76081

64.90254 -73.31558 62.80966

64.92664 -73.29649 62.85487

64.94813 -73.27967 62.89856

64.97334 -73.25912 62.93606

64.99815 -73.23876 62.9706

65.02248 -73.21872 63.0024

65.03849 -73.20665 63.04232

65.06349 -73.18555 63.06713

65.08768 -73.16504 63.08965

65.11105 -73.14519 63.11015

65.13361 -73.12593 63.12876

65.15533 -73.10738 63.14573

65.17625 -73.08942 63.16121

65.19635 -73.07211 63.17532

65.2157 -73.05542 63.18821

65.23428 -73.03932 63.19999

65.25211 -73.02383 63.21077

65.26923 -73.00895 63.22066

65.28567 -72.99464 63.22974

65.30144 -72.98084 63.23806

65.31657 -72.96761 63.24572

65.33111 -72.95486 63.25274

65.34504 -72.9426 63.25924

65.35843 -72.9308 63.26521

65.37128 -72.91946 63.27072

65.38363 -72.90854 63.27583

65.39547 -72.89803 63.28054

65.40688 -72.8879 63.2849

65.41784 -72.87816 63.28895

65.42838 -72.86877 63.2927

65.43853 -72.85971 63.29618

65.4483 -72.85097 63.29942

65.45772 -72.84254 63.30244

65.4668 -72.83441 63.30525

65.47556 -72.82655 63.30788

65.48401 -72.81895 63.31033

65.49217 -72.81158 63.3126

65.50008 -72.80447 63.31474

65.50772 -72.79758 63.31675

65.51511 -72.79089 63.31864

# section 6

XYZ

240

101.9739 0.4408544 0.962562

101.9739 0.4302365 0.9642307

101.974 0.4193955 0.9665796

101.974 0.4083215 0.9696008

101.974 0.3970194 0.9732909

101.9741 0.3854792 0.9776931

101.9742 0.3737079 0.9827964

101.9742 0.3614945 0.9881108

101.9744 0.3488922 0.9938315

101.9745 0.3357964 0.9997954

101.9746 0.3221586 1.005982

101.9748 0.3079857 1.012477

101.9751 0.2932195 1.019252

101.9753 0.2778231 1.026319

101.9755 0.2617593 1.033699

101.9758 0.2449798 1.041394

101.9761 0.2274615 1.049458

101.9763 0.2091478 1.057891

101.9767 0.1899914 1.066715

101.977 0.1699419 1.075954

101.9773 0.1489411 1.085625

101.9777 0.1269428 1.09577

101.978 0.1038804 1.106406

101.9783 0.079690956 1.117563

101.9787 0.05430641 1.129271

101.979 0.027657768 1.141564

101.9794 -0.0003300533 1.154478

101.9798 -0.029737247 1.168048

101.9802 -0.060649369 1.182312

101.9806 -0.093152113 1.197316

101.981 -0.1273411 1.213102

101.9814 -0.1633182 1.229711

101.9818 -0.2011846 1.247201

101.9822 -0.2410533 1.26562

101.9827 -0.283044 1.285018

101.9831 -0.3272765 1.305463

101.9836 -0.373885 1.32701

101.984 -0.4230107 1.349721

101.9845 -0.4747939 1.373676

101.9849 -0.5293936 1.39894

101.9854 -0.5869744 1.425588

101.9858 -0.6477066 1.453706

101.9862 -0.7117742 1.483375

101.9866 -0.7793657 1.514695

101.987 -0.8506904 1.547747

101.9873 -0.9259522 1.582651

101.9876 -1.005386 1.619496

101.9878 -1.089221 1.658412

101.9881 -1.177716 1.699498

101.9882 -1.271124 1.742901

101.9882 -1.36973 1.788733

101.9881 -1.473818 1.837155

101.988 -1.5837 1.888295

101.9877 -1.699696 1.942313

101.9872 -1.822137 1.999387

101.9866 -1.951387 2.059667

101.9857 -2.087813 2.123341

101.9846 -2.231792 2.190622

101.9832 -2.383748 2.261678

101.9815 -2.544102 2.33673

101.9795 -2.713293 2.416014

101.977 -2.891793 2.499738

101.9741 -3.080083 2.588156

101.9706 -3.278667 2.681525

101.9666 -3.48807 2.780111

101.9618 -3.708841 2.884192

101.9563 -3.941547 2.994057

101.95 -4.186777 3.110019

101.9427 -4.445132 3.232395

101.9343 -4.717245 3.36152

101.9247 -5.003757 3.497739

101.9137 -5.305338 3.641418

101.9011 -5.622669 3.792934

101.8869 -5.956452 3.952677

101.8707 -6.307402 4.121054

101.8524 -6.676246 4.298489

101.8318 -7.063726 4.485419

101.8085 -7.470584 4.68229

101.7825 -7.8976 4.889537

101.7531 -8.345474 5.107728

101.7202 -8.814999 5.337299

101.6834 -9.306923 5.578762

101.6426 -9.821997 5.832634

101.5968 -10.36087 6.099534

101.546 -10.92435 6.379867

101.4895 -11.513 6.674382

101.427 -12.12755 6.98348

101.3575 -12.76845 7.307955

101.2807 -13.43629 7.648333

101.1958 -14.13154 8.005214

101.1022 -14.85472 8.378993

100.9994 -15.60629 8.770059

100.8867 -16.38661 9.178833

100.7636 -17.19596 9.605776

100.6293 -18.03447 10.05132

100.4829 -18.90212 10.51593

100.3236 -19.79879 11.00002

100.1505 -20.72428 11.50395

99.96281 -21.67829 12.02798

99.75985 -22.66035 12.57237

99.54083 -23.66987 13.13729

99.305 -24.7061 13.7229

99.05163 -25.76814 14.32923

98.78003 -26.85494 14.95627

98.48951 -27.9653 15.60393

98.17955 -29.09787 16.27202

97.84963 -30.25115 16.96027

97.49937 -31.42351 17.6683

97.12841 -32.61316 18.39566

96.7365 -33.81821 19.14178

96.32508 -35.03746 19.90546

95.89083 -36.26697 20.68708

95.43568 -37.50545 21.48516

94.95989 -38.75062 22.29874

94.46381 -40.00011 23.12676

93.94794 -41.25152 23.96806

93.41279 -42.50225 24.82145

92.85888 -43.74974 25.6857

92.28754 -44.99179 26.55933

91.70023 -46.2263 27.44079

91.09795 -47.45089 28.32857

90.48175 -48.66315 29.22111

89.85174 -49.85983 30.11739

89.20915 -51.03848 31.01603

88.55877 -52.19989 31.91431

87.904 -53.34383 32.81013

87.24507 -54.46688 33.70307

86.57966 -55.56201 34.59539

85.91346 -56.63008 35.48559

85.24778 -57.66853 36.37346

84.58418 -58.6766 37.25707

83.92336 -59.65207 38.1358

83.26836 -60.5971 39.00621

82.61964 -61.50976 39.86779

81.97929 -62.3913 40.71803

81.34782 -63.24039 41.55631

80.72689 -64.05833 42.38067

80.11746 -64.84498 43.19008

79.52034 -65.60072 43.98345

78.93624 -66.32565 44.75997

78.36605 -67.02078 45.51851

77.81028 -67.68643 46.25847

77.26945 -68.32338 46.97917

76.74384 -68.93204 47.68025

76.23398 -69.51363 48.36101

75.74004 -70.0688 49.02124

75.26212 -70.59834 49.66074

74.80022 -71.10276 50.27956

74.35458 -71.58347 50.87736

73.92494 -72.04116 51.45427

73.51118 -72.4763 52.01063

73.11327 -72.89037 52.54628

72.73083 -73.28368 53.06173

72.36378 -73.65755 53.55701

72.01167 -74.01237 54.03273

71.67426 -74.34922 54.48909

71.35123 -74.669 54.92649

71.0421 -74.97215 55.34553

70.74656 -75.25964 55.74659

70.46424 -75.53217 56.13015

70.19467 -75.79058 56.49669

69.93745 -76.03526 56.84684

69.69216 -76.267 57.1811

69.45836 -76.48644 57.49999

69.23566 -76.69426 57.80401

69.02359 -76.89101 58.09373

68.8218 -77.07723 58.36968

68.62981 -77.25348 58.63239

68.44724 -77.42013 58.88247

68.2737 -77.57791 59.1203

68.10884 -77.72718 59.34644

67.95224 -77.86839 59.56138

67.80348 -78.00185 59.76569

67.66228 -78.12812 59.95972

67.52827 -78.24756 60.14399

67.40108 -78.36038 60.31897

67.28047 -78.46718 60.48503

67.16606 -78.56808 60.64263

67.05759 -78.66358 60.79212

66.95478 -78.75392 60.9339

66.85733 -78.83926 61.06843

66.76501 -78.92003 61.196

66.67764 -78.99643 61.31702

66.59509 -79.06856 61.43196

66.51748 -79.13631 61.54138

66.44496 -79.19939 61.64582

66.37773 -79.25756 61.74583

66.31719 -79.30951 61.84257

66.26226 -79.35638 61.93575

66.21446 -79.39672 62.02678

66.17324 -79.43118 62.11549

66.14018 -79.45844 62.20334

66.11353 -79.48007 62.28864

66.09583 -79.49393 62.37329

66.08223 -79.50439 62.45394

66.07794 -79.50685 62.53304

66.07433 -79.50883 62.60756

66.08053 -79.50253 62.67879

66.0895 -79.49396 62.74574

66.09752 -79.48627 62.80881

66.11326 -79.47219 62.86681

66.13031 -79.45706 62.92075

66.14436 -79.44449 62.97256

66.16524 -79.42632 63.01791

66.18641 -79.40791 63.05976

66.20774 -79.38945 63.09836

66.21626 -79.3816 63.14688

66.24055 -79.36079 63.17706

66.26431 -79.34045 63.20452

66.28748 -79.32067 63.22957

66.31004 -79.30138 63.25235

66.33194 -79.28271 63.27312

66.35318 -79.2646 63.29206

66.37374 -79.24709 63.30932

66.39362 -79.23014 63.32505

66.41286 -79.21375 63.33941

66.4314 -79.19795 63.35251

66.4493 -79.18275 63.3645

66.46654 -79.16809 63.37547

66.48315 -79.15395 63.38547

66.49917 -79.14034 63.39466

66.51459 -79.12724 63.40306

66.52942 -79.11461 63.41079

66.54372 -79.10246 63.41785

66.55749 -79.09076 63.42435

66.57073 -79.0795 63.43034

66.58349 -79.06866 63.43585

66.59578 -79.0582 63.44091

66.60763 -79.04813 63.44558

66.61904 -79.03844 63.4499

66.63005 -79.02908 63.45389

66.64066 -79.02005 63.45758

66.6509 -79.01134 63.461

66.6608 -79.00293 63.46417

66.67034 -78.9948 63.46712

66.67957 -78.98696 63.46984

66.68851 -78.97935 63.47238

66.69714 -78.972 63.47474

66.70551 -78.9649 63.47694

66.71362 -78.95798 63.47901

# section 7

XYZ

240

111.5202 0.8182534 1.309502

111.5202 0.8069944 1.311534

111.5203 0.7955078 1.314288

111.5204 0.7837685 1.317709

111.5204 0.7717517 1.321727

111.5204 0.7594385 1.326374

111.5204 0.7467957 1.331557

111.5204 0.7336695 1.336941

111.5203 0.7200698 1.342642

111.5201 0.7059274 1.34857

111.5199 0.691213 1.354741

111.5197 0.6758879 1.361169

111.5195 0.6599191 1.367871

111.5192 0.6432681 1.374864

111.5189 0.6258935 1.382164

111.5187 0.6077489 1.389779

111.5183 0.5887977 1.397756

111.5179 0.5689856 1.406098

111.5175 0.5482606 1.414828

111.5171 0.5265689 1.423967

111.5166 0.50385 1.433534

111.5161 0.4800494 1.443573

111.5156 0.4550974 1.454097

111.515 0.4289266 1.465137

111.5144 0.4014627 1.476722

111.5138 0.372632 1.48889

111.5131 0.3423517 1.501671

111.5124 0.3105356 1.515102

111.5116 0.2770921 1.52922

111.5107 0.2419281 1.544071

111.5098 0.2049395 1.559696

111.5089 0.1660169 1.576136

111.5079 0.1250515 1.59345

111.5068 0.081919834 1.611682

111.5057 0.0364924 1.630883

111.5044 -0.011358795 1.651122

111.5031 -0.061779842 1.672453

111.5017 -0.1149232 1.694936

111.5001 -0.1709405 1.718652

111.4984 -0.2300039 1.743664

111.4967 -0.2922913 1.770045

111.4948 -0.3579855 1.797885

111.4927 -0.4272878 1.827259

111.4905 -0.5003992 1.85827

111.4881 -0.5775475 1.890996

111.4855 -0.6589518 1.925559

111.4827 -0.7448679 1.962043

111.4796 -0.8355407 2.000581

111.4764 -0.9312509 2.041269

111.4728 -1.032272 2.084253

111.469 -1.138913 2.129646

111.4647 -1.251477 2.177606

111.4602 -1.370304 2.228261

111.4553 -1.495739 2.281768

111.4499 -1.628137 2.338306

111.4441 -1.767893 2.398024

111.4378 -1.915402 2.461109

111.4308 -2.071069 2.527775

111.4232 -2.235353 2.598186

111.415 -2.408709 2.672561

111.406 -2.591608 2.751134

111.3962 -2.78456 2.834115

111.3855 -2.988081 2.921759

111.3738 -3.202715 3.014322

111.3609 -3.429026 3.11207

111.3469 -3.667606 3.215276

111.3315 -3.919066 3.324232

111.3148 -4.184037 3.439247

111.2964 -4.463168 3.560642

111.2763 -4.757134 3.68875

111.2542 -5.06663 3.82392

111.23 -5.392367 3.966516

111.2035 -5.73508 4.116916

111.1745 -6.095519 4.275515

111.1426 -6.474453 4.442722

111.1077 -6.872657 4.618962

111.0694 -7.290926 4.804676

111.0275 -7.730049 5.000318

110.9817 -8.190864 5.206321

110.9314 -8.674109 5.423272

110.8763 -9.180634 5.651608

110.8161 -9.711234 5.891842

110.7505 -10.2667 6.144508

110.6784 -10.84772 6.410257

110.6 -11.45516 6.689477

110.5141 -12.08959 6.982946

110.4206 -12.7518 7.29109

110.3184 -13.44223 7.614727

110.207 -14.16153 7.954366

110.0856 -14.91018 8.310581

109.9533 -15.68877 8.683741

109.8096 -16.49777 9.07417

109.6539 -17.33762 9.482242

109.4855 -18.20858 9.908397

109.3035 -19.11078 10.35306

109.1069 -20.04419 10.81669

108.8946 -21.00863 11.29974

108.6658 -22.00388 11.80253

108.4198 -23.0296 12.32531

108.1554 -24.08526 12.86831

107.8721 -25.17021 13.43171

107.5688 -26.28361 14.01564

107.2449 -27.42448 14.62014

106.8995 -28.59165 15.24517

106.532 -29.78381 15.89062

106.1417 -30.99948 16.5563

105.728 -32.23701 17.24192

105.2907 -33.49463 17.9471

104.8293 -34.77039 18.67136

104.3436 -36.06221 19.41411

103.8351 -37.36881 20.17417

103.3004 -38.68588 20.95188

102.7415 -40.01205 21.74575

102.1588 -41.3448 22.55481

101.5528 -42.68158 23.378

100.924 -44.01979 24.21416

100.273 -45.35659 25.06214

99.60056 -46.68917 25.92071

98.90813 -48.01524 26.7883

98.19751 -49.33261 27.66328

97.46984 -50.63863 28.54424

96.72639 -51.93068 29.42973

95.96733 -53.20525 30.31865

95.19408 -54.45975 31.2096

94.41209 -55.69516 32.09995

93.62537 -56.91133 32.98766

92.83411 -58.10473 33.87226

92.03527 -59.26814 34.75562

91.23511 -60.40316 35.63582

90.43493 -61.50692 36.51296

89.63681 -62.5781 37.38582

88.84151 -63.61434 38.25387

88.05277 -64.61794 39.11368

87.27114 -65.58672 39.96491

86.49922 -66.52195 40.80518

85.73762 -67.42215 41.63397

84.98842 -68.2887 42.44935

84.25275 -69.12149 43.25026

83.53166 -69.92088 44.0357

82.82606 -70.68699 44.80488

82.13701 -71.4209 45.55667

81.46518 -72.12296 46.29048

80.81122 -72.79406 47.0056

80.1755 -73.43465 47.70168

79.55867 -74.04607 48.37798

78.961 -74.62907 49.03428

78.38257 -75.18451 49.67031

77.82343 -75.713 50.28613

77.28387 -76.21607 50.88135

76.76362 -76.6945 51.45608

76.26252 -77.1488 52.01061

75.78054 -77.58064 52.54477

75.31729 -77.9903 53.05905

74.8726 -78.37932 53.55345

74.44598 -78.74806 54.02853

74.03716 -79.09775 54.48449

73.64572 -79.42937 54.92167

73.27112 -79.74339 55.34068

72.91295 -80.04088 55.74187

72.57079 -80.3226 56.12568

72.24408 -80.58949 56.49257

71.93233 -80.84191 56.84319

71.63501 -81.08076 57.17802

71.35162 -81.30672 57.49755

71.08167 -81.52052 57.80227

70.82462 -81.72277 58.09273

70.58002 -81.91403 58.36945

70.3473 -82.09492 58.63296

70.12599 -82.26579 58.88387

69.91564 -82.42746 59.12253

69.7158 -82.58032 59.34952

69.52597 -82.72483 59.5653

69.34564 -82.86127 59.77044

69.17449 -82.9903 59.96532

69.01206 -83.1123 60.15041

68.85789 -83.22742 60.32622

68.71169 -83.33638 60.49307

68.573 -83.43925 60.65145

68.44151 -83.53658 60.80169

68.31683 -83.62864 60.94415

68.19862 -83.71552 61.07935

68.08656 -83.79771 61.20751

67.98029 -83.87538 61.32899

67.87949 -83.94877 61.44413

67.78375 -84.01829 61.55318

67.69266 -84.0844 61.65637

67.60584 -84.14743 61.75412

67.5229 -84.20786 61.84704

67.44502 -84.2646 61.93648

67.37276 -84.31709 62.02403

67.30795 -84.36393 62.11068

67.25184 -84.40386 62.19839

67.20393 -84.43751 62.28503

67.16682 -84.4625 62.37344

67.13548 -84.48319 62.45837

67.11599 -84.49447 62.54391

67.09816 -84.50472 62.6245

67.09313 -84.50493 62.70334

67.0923 -84.502 62.77786

67.09089 -84.49978 62.84793

67.09995 -84.48948 62.91339

67.11124 -84.47756 62.97444

67.11922 -84.46845 63.03288

67.13655 -84.45221 63.08462

67.15478 -84.43541 63.13243

67.17366 -84.41824 63.17658

67.17607 -84.41381 63.23211

67.19978 -84.39324 63.26664

67.2232 -84.37303 63.29814

67.24619 -84.35331 63.3269

67.26876 -84.33401 63.35308

67.29081 -84.31525 63.37695

67.31231 -84.297 63.3987

67.33324 -84.27932 63.41852

67.35358 -84.26217 63.43658

67.37333 -84.24554 63.45304

67.39246 -84.22949 63.46803

67.41098 -84.21401 63.48172

67.42889 -84.19908 63.49424

67.4462 -84.18465 63.50562

67.46291 -84.17075 63.51605

67.47906 -84.15735 63.52556

67.49463 -84.14443 63.53429

67.50968 -84.132 63.54225

67.52419 -84.12001 63.54955

67.53816 -84.10848 63.55626

67.55165 -84.09736 63.56242

67.56467 -84.08664 63.56806

67.57725 -84.07631 63.57324

67.58937 -84.06635 63.57802

67.60107 -84.05675 63.58242

67.61237 -84.04749 63.58647

67.62328 -84.03855 63.59023

67.63383 -84.02992 63.59369

67.64403 -84.02158 63.59689

67.65389 -84.01352 63.59985

67.66344 -84.00572 63.60259

67.67268 -83.9982 63.60513

67.68164 -83.99091 63.6075

67.69032 -83.98381 63.60971

# section 8

XYZ

240

118.5719 1.097033 1.565779

118.572 1.085298 1.568081

118.5721 1.073335 1.571133

118.5722 1.061106 1.574852

118.5722 1.04856 1.579115

118.5722 1.035676 1.583937

118.5723 1.022396 1.589186

118.5721 1.008588 1.594617

118.5716 0.9942549 1.600303

118.5714 0.9793393 1.606206

118.571 0.9638215 1.612361

118.5704 0.9476539 1.618742

118.5696 0.9307941 1.625389

118.5691 0.9132116 1.632325

118.5684 0.8948702 1.639567

118.5677 0.8757236 1.647126

118.5669 0.8557145 1.655041

118.5661 0.8347871 1.663306

118.5654 0.8129116 1.671973

118.5644 0.7900029 1.681041

118.5633 0.7660131 1.690528

118.5624 0.7408882 1.700493

118.5607 0.7145366 1.710933

118.5596 0.6869038 1.721889

118.5583 0.6578985 1.733373

118.5571 0.6274567 1.745452

118.5553 0.5954814 1.758129

118.5541 0.5618938 1.77147

118.5522 0.5265774 1.785472

118.5506 0.4894429 1.800213

118.5487 0.4503886 1.815718

118.5467 0.4092908 1.832036

118.5445 0.3660346 1.849217

118.5422 0.32049 1.867306

118.54 0.2725276 1.886371

118.5377 0.2220041 1.906454

118.5347 0.1687658 1.927626

118.5323 0.1126589 1.949948

118.5289 0.053509559 1.973475

118.526 -0.0088514304 1.998303

118.5228 -0.074610062 2.024497

118.519 -0.1439764 2.052121

118.5148 -0.2171453 2.081276

118.511 -0.2943297 2.112064

118.5064 -0.3757789 2.144554

118.5015 -0.4617248 2.178861

118.4965 -0.5524251 2.215076

118.4911 -0.6481513 2.253332

118.4851 -0.7491917 2.293725

118.4787 -0.8558361 2.336407

118.472 -0.9684154 2.381469

118.465 -1.08724 2.429099

118.4571 -1.212674 2.479385

118.4488 -1.34508 2.532524

118.4401 -1.484833 2.588664

118.4303 -1.632351 2.647958

118.4195 -1.788049 2.710604

118.4087 -1.952345 2.776822

118.3966 -2.12573 2.846759

118.3834 -2.30869 2.920642

118.3693 -2.501718 2.998689

118.3539 -2.705343 3.081111

118.3375 -2.920115 3.168177

118.3197 -3.146608 3.260163

118.3003 -3.38541 3.357284

118.2795 -3.637147 3.459843

118.2567 -3.902463 3.568128

118.2321 -4.182009 3.682443

118.206 -4.476498 3.803108

118.1769 -4.786597 3.930463

118.1459 -5.113064 4.064863

118.1117 -5.456647 4.206656

118.0749 -5.818111 4.356244

118.0348 -6.19825 4.513976

117.9917 -6.597862 4.680341

117.9446 -7.017731 4.855706

117.8934 -7.458743 5.040511

117.8373 -7.921721 5.235238

117.7772 -8.407521 5.440338

117.7111 -8.91687 5.656344

117.6397 -9.45069 5.883768

117.5624 -10.00991 6.123099

117.478 -10.59519 6.374879

117.387 -11.20736 6.639794

117.2879 -11.84727 6.918175

117.1806 -12.51549 7.210871

117.0642 -13.2129 7.518314

116.9376 -13.93994 7.841328

116.8009 -14.69724 8.180438

116.6526 -15.48536 8.536136

116.4916 -16.30486 8.90886

116.3179 -17.15629 9.29881

116.1303 -18.04009 9.706386

115.9282 -18.95654 10.13192

115.711 -19.9059 10.57595

115.4772 -20.88785 11.03887

115.2257 -21.90227 11.52115

114.9563 -22.94906 12.0231

114.6665 -24.02779 12.54491

114.3572 -25.13776 13.08692

114.0263 -26.27853 13.64921

113.6734 -27.44893 14.23188

113.2973 -28.64802 14.83505

112.8972 -29.87455 15.45855

112.473 -31.12714 16.10238

112.0233 -32.40413 16.76625

111.5475 -33.70403 17.45003

111.0459 -35.02443 18.15299

110.5178 -36.36397 18.875

109.9627 -37.71989 19.61524

109.3826 -39.09087 20.37264

108.7739 -40.47264 21.14742

108.1384 -41.8637 21.9382

107.4767 -43.26111 22.7439

106.7894 -44.66228 23.56359

106.0768 -46.06461 24.39597

105.3406 -47.46492 25.23989

104.5803 -48.86049 26.09426

103.7989 -50.24874 26.95738

102.997 -51.62711 27.82759

102.1763 -52.99327 28.70352

101.3389 -54.34436 29.58382

100.4846 -55.67635 30.46729

99.61515 -56.98692 31.35262

98.73578 -58.27713 32.23711

97.85152 -59.54646 33.11869

96.96246 -60.79198 33.99712

96.06506 -62.00578 34.87402

95.16636 -63.19038 35.7467

94.26646 -64.34221 36.61598

93.36924 -65.46015 37.48098

92.47437 -66.54121 38.34118

91.5871 -67.58798 39.19315

90.70685 -68.59806 40.03659

89.83813 -69.57314 40.86956

88.98028 -70.51135 41.69135

88.13643 -71.41375 42.50003

87.30731 -72.28067 43.29476

86.49492 -73.11205 44.07433

85.69929 -73.90892 44.83817

84.92276 -74.67134 45.58493

84.1648 -75.40028 46.31402

83.42735 -76.0965 47.02518

82.7104 -76.7606 47.71762

82.0147 -77.394 48.39057

81.34036 -77.99771 49.04382

80.68747 -78.57215 49.67733

80.05666 -79.11854 50.2909

79.44762 -79.63783 50.8844

78.86026 -80.13189 51.45747

78.29474 -80.60019 52.01061

77.75065 -81.04545 52.54365

77.22798 -81.4669 53.05709

76.72569 -81.86713 53.55091

76.24419 -82.24647 54.02546

75.78271 -82.6052 54.48112

75.34039 -82.9457 54.91805

74.91761 -83.26762 55.33705

74.51302 -83.5729 55.73848

74.12713 -83.86141 56.12232

73.7579 -84.13438 56.4895

73.40583 -84.3924 56.84041

73.06992 -84.63679 57.17577

72.75011 -84.86731 57.49585

72.44541 -85.08557 57.8009

72.15483 -85.29173 58.09191

71.87882 -85.48691 58.36919

71.61592 -85.67121 58.6335

71.36606 -85.84544 58.88496

71.1283 -86.00983 59.12421

70.90267 -86.16543 59.35177

70.68823 -86.31223 59.56812

70.48489 -86.45094 59.77406

70.29142 -86.58178 59.96951

70.10823 -86.70596 60.15516

69.9339 -86.82262 60.33154

69.7687 -86.93328 60.49896

69.61211 -87.03741 60.65791

69.46378 -87.13634 60.8087

69.32288 -87.22952 60.95171

69.18952 -87.31757 61.08746

69.0629 -87.40085 61.21593

68.94263 -87.47958 61.33793

68.82838 -87.55361 61.45309

68.71923 -87.62476 61.56186

68.61418 -87.69305 61.6642

68.51283 -87.75955 61.76028

68.4136 -87.82616 61.85038

68.31889 -87.89014 61.93703

68.22824 -87.95163 62.02206

68.14604 -88.00785 62.10706

68.07309 -88.05682 62.19474

68.0095 -88.09938 62.28225

67.95789 -88.13281 62.37347

67.91364 -88.16084 62.46172

67.88294 -88.17879 62.55202

67.85449 -88.19521 62.63707

67.84106 -88.19984 62.72153

67.83297 -88.20138 62.80165

67.82481 -88.2031 62.87678

67.82884 -88.19559 62.94782

67.8357 -88.18593 63.01417

67.8392 -88.17958 63.07739

67.85423 -88.16452 63.13389

67.8702 -88.14925 63.18616

67.88739 -88.13276 63.23426

67.88486 -88.13107 63.29509

67.9085 -88.11055 63.33272

67.93142 -88.09042 63.36729

67.9544 -88.07071 63.39883

67.97695 -88.05131 63.42752

67.99903 -88.03264 63.45364

68.02103 -88.01438 63.47738

68.04202 -87.9967 63.49915

68.06287 -87.97947 63.51889

68.08267 -87.96233 63.537

68.10234 -87.94626 63.5534

68.12141 -87.93077 63.56824

68.13985 -87.91526 63.58187

68.15772 -87.90087 63.59435

68.17499 -87.88644 63.60564

68.19169 -87.87298 63.61599

68.20735 -87.86002 63.62554

68.22343 -87.8471 63.63408

68.23849 -87.8351 63.64194

68.25255 -87.82344 63.64921

68.26661 -87.81187 63.65591

68.2802 -87.80118 63.66208

68.29331 -87.79029 63.66757

68.306 -87.78037 63.67264

68.31824 -87.7707 63.67732

68.33009 -87.76137 63.68165

68.34155 -87.7519 63.68568

68.35265 -87.74334 63.68941

68.36339 -87.73495 63.69265

68.37379 -87.72639 63.69587

68.38345 -87.71868 63.69886

68.3932 -87.71098 63.70142

68.4027 -87.70365 63.70381

68.41194 -87.69621 63.70628

NI_END nibladegeometry

NI_END NIBlade

NI_END nirow

NI_END GEOMTURBO

2D-opt rotor

GEOMETRY TURBO

VERSION 5.5

TOLERANCE 1e-006

UNITS Millimeters

UNITS-FACTOR 0.001

NI_BEGIN CHANNEL

NI_BEGIN basic_curve

NAME hub

DISCRETISATION 10

DATA_REDUCTION 0

NI_BEGIN zrcurve

ZR polyline

61

-51.5 53.9

-49.21561 53.90031

-46.93121 53.90062

-44.64682 53.90092

-42.36243 53.90123

-40.07804 53.90154

-37.794 53.90379

-35.51014 53.907

-33.22628 53.91021

-30.94242 53.91342

-28.65973 53.92262

-26.37783 53.93597

-24.09594 53.94931

-21.81616 53.9735

-19.53892 54.01066

-17.26186 54.04875

-14.9933 54.13031

-12.72597 54.21823

-10.47087 54.36922

-8.224883 54.56771

-5.990868 54.82878

-3.773875 55.17958

-1.575784 55.63179

0.607303 56.16594

2.7778 56.77041

4.938821 57.42956

7.093251 58.1285

9.24334 58.85529

11.39071 59.60115

13.53626 60.36176

15.68118 61.12989

17.82587 61.90254

19.97054 62.67826

22.11536 63.45613

24.26044 64.23514

26.40571 65.01463

28.55114 65.79447

30.69671 66.57465

32.84226 67.35525

34.98771 68.13633

37.13298 68.91798

39.27785 69.70074

41.42223 70.48467

43.56609 71.2699

45.70932 72.05659

47.85183 72.84492

49.9935 73.63507

52.13438 74.42683

54.27462 75.21958

56.41451 76.01243

58.55453 76.80369

60.69574 77.58956

62.8397 78.3652

64.98862 79.12299

67.14771 79.84467

69.32126 80.51403

71.51443 81.10916

73.73013 81.61211

75.96819 82.11244

78.22631 82.50605

80.5 83

NI_END zrcurve

NI_END basic_curve

NI_BEGIN basic_curve

NAME shroud

DISCRETISATION 10

DATA_REDUCTION 0

NI_BEGIN zrcurve

ZR polyline

61

-51.5 114

-49.29776 114

-47.09553 114

-44.89329 114

-42.69106 114

-40.48882 114

-38.28658 114

-36.08435 114

-33.88211 114

-31.67988 114

-29.47764 114

-27.2754 114

-25.07317 114

-22.87093 114

-20.6687 114

-18.46646 114

-16.26423 114

-14.06199 114

-11.85976 114

-9.657521 114

-7.455283 114

-5.253046 114

-3.050811 114

-0.8485787 114

1.353657 114

3.555809 113.9975

5.753081 113.8497

7.950353 113.7019

10.14762 113.5541

12.3449 113.4063

14.54217 113.2586

16.73944 113.1108

18.93671 112.963

21.13398 112.8152

23.33126 112.6674

25.52852 112.5196

27.7258 112.3719

29.92307 112.2241

32.12035 112.0763

34.31761 111.9285

36.51489 111.7807

38.71216 111.6329

40.90943 111.4852

43.1067 111.3374

45.30398 111.1896

47.50124 111.0418

49.69851 110.894

51.89579 110.7462

54.09306 110.5984

56.29033 110.4507

58.4876 110.3029

60.68488 110.1551

62.88215 110.0073

65.08435 110.0015

67.28658 110.0003

69.48882 110

71.69106 110

73.8933 110

76.09553 110

78.29777 110

80.5 110

NI_END zrcurve

NI_END basic_curve

NI_BEGIN channel_curve hub

NAME hub

VERTEX CURVE_P hub 0

VERTEX CURVE_P hub 1

NI_END channel_curve hub

NI_BEGIN channel_curve shroud

NAME shroud

VERTEX CURVE_P shroud 0

VERTEX CURVE_P shroud 1

NI_END channel_curve shroud

NI_BEGIN channel_curve nozzle

NAME nozzle

NI_END channel_curve nozzle

NI_END CHANNEL

NI_BEGIN nirow

NAME row 1

TYPE normal

PERIODICITY 15

ROTATION_SPEED 45000

NI_BEGIN NINonAxiSurfaces hub

NAME non axisymmetric hub

REPETITION 0

NI_END NINonAxiSurfaces hub

NI_BEGIN NINonAxiSurfaces shroud

NAME non axisymmetric shroud

REPETITION 0

NI_END NINonAxiSurfaces shroud

NI_BEGIN NINonAxiSurfaces tip_gap

NAME non axisymmetric tip gap

REPETITION 0

NI_END NINonAxiSurfaces tip_gap

NI_BEGIN NIBlade

NAME Main Blade

NI_BEGIN NITipGap

WIDTH_AT_LEADING_EDGE 0.2

WIDTH_AT_TRAILING_EDGE 0.2

NI_BEGIN NINonAxiSurfaces hub

NAME non axisymmetric hub

REPETITION 0

NI_END NINonAxiSurfaces hub

NI_END NITipGap

NI_BEGIN nibladegeometry

TYPE GEOMTURBO

GEOMETRY_MODIFIED 0

GEOMETRY TURBO VERSION 5

blade_expansion_factor_hub 0.3

blade_expansion_factor_shroud 0.15

intersection_npts 10

intersection_control 1

data_reduction 1

data_reduction_spacing_tolerance 1e-006

data_reduction_angle_tolerance 90

control_points_distribution 0 9 241 9 160 0.00998472303071045 0.0106282877266306

units 1

number_of_blades 15

blade_tangential_definition 0

suction

SECTIONAL

8

# section 1

XYZ

240

49.35203 0.8562099 0.4036607

49.35196 0.8640092 0.4042588

49.35193 0.8720027 0.4053636

49.35165 0.8801813 0.4070016

49.35161 0.8885343 0.4091857

49.35156 0.8970156 0.4121236

49.35131 0.9054373 0.4161471

49.35165 0.9138175 0.4208957

49.35215 0.9218901 0.4266031

49.35368 0.9291853 0.4333345

49.35793 0.9347176 0.4411824

49.3644 0.9375942 0.4502481

49.37131 0.9379365 0.4603157

49.37868 0.935806 0.4709648

49.38595 0.9313488 0.4818438

49.39326 0.9247075 0.4926848

49.40068 0.9160715 0.5032811

49.40749 0.9056908 0.5134862

49.41397 0.893757 0.5229777

49.42021 0.8805059 0.5314243

49.42541 0.8662838 0.5395254

49.43154 0.8515636 0.5481833

49.43769 0.8365512 0.5576708

49.44386 0.8209962 0.5678074

49.45101 0.8045448 0.5783191

49.45803 0.7877932 0.5898632

49.46581 0.7702034 0.6019996

49.47343 0.7517223 0.6147484

49.48188 0.7323227 0.6281891

49.4905 0.7119328 0.6423375

49.49972 0.6904912 0.6572288

49.50937 0.6679435 0.67292

49.51944 0.6442339 0.6894723

49.53001 0.6192658 0.7068993

49.54128 0.593015 0.7253187

49.5533 0.5653737 0.7447499

49.56563 0.5362543 0.7652375

49.57857 0.5056052 0.7868981

49.59257 0.4733135 0.8097684

49.60699 0.4392848 0.8339164

49.6223 0.4034427 0.8594501

49.63862 0.3656504 0.8864147

49.65543 0.3258405 0.9149598

49.67353 0.283855 0.9450967

49.69223 0.2396181 0.9770169

49.71207 0.1929557 1.010749

49.73331 0.143784 1.046472

49.7551 0.091914535 1.084232

49.77859 0.037255291 1.124238

49.80325 -0.020410836 1.166544

49.82947 -0.08120013 1.211358

49.85668 -0.1453127 1.258785

49.88544 -0.2129317 1.308973

49.91573 -0.2842008 1.362173

49.94769 -0.3593743 1.418458

49.98183 -0.4386307 1.47806

50.01679 -0.5221631 1.541231

50.05432 -0.610247 1.608079

50.09356 -0.703094 1.678863

50.13504 -0.8009573 1.753806

50.17833 -0.90407 1.833239

50.22449 -1.012749 1.917282

50.27245 -1.127269 2.006265

50.32276 -1.247915 2.100443

50.37617 -1.374983 2.200137

50.43187 -1.508831 2.305653

50.49038 -1.64974 2.41729

50.55169 -1.798084 2.535425

50.61599 -1.954222 2.660401

50.6836 -2.118557 2.792531

50.75407 -2.291414 2.932221

50.8278 -2.473251 3.079798

50.90523 -2.664459 3.235826

50.98597 -2.86547 3.400583

51.07012 -3.076683 3.574568

51.15817 -3.298565 3.758173

51.24964 -3.53164 3.951911

51.34483 -3.776306 4.156233

51.44432 -4.033109 4.371462

51.54702 -4.302464 4.59833

51.65369 -4.584947 4.837178

51.76427 -4.881057 5.088491

51.87906 -5.191278 5.352781

51.9973 -5.516051 5.630617

52.11956 -5.856028 5.922339

52.24529 -6.211663 6.228524

52.37501 -6.583504 6.54958

52.5083 -6.97193 6.885952

52.64445 -7.377154 7.238608

52.78427 -7.799582 7.608089

52.92678 -8.239424 7.994776

53.07298 -8.69707 8.399142

53.22186 -9.172862 8.821718

53.37329 -9.666899 9.262816

53.52725 -10.17926 9.723047

53.68312 -10.71048 10.20259

53.84079 -11.26028 10.70178

53.99987 -11.82867 11.22106

54.15973 -12.41571 11.76045

54.32037 -13.02119 12.32026

54.48132 -13.64488 12.90062

54.64196 -14.2865 13.50141

54.80206 -14.94574 14.12254

54.96069 -15.62181 14.76413

55.11828 -16.31454 15.42588

55.27348 -17.02287 16.10749

55.42656 -17.74643 16.80841

55.57683 -18.48408 17.52863

55.72438 -19.23492 18.26667

55.86779 -19.99805 19.02295

56.00699 -20.77208 19.79634

56.14199 -21.55611 20.58584

56.27247 -22.34877 21.39064

56.3978 -23.1489 22.20959

56.51793 -23.95494 23.04154

56.63307 -24.76519 23.8854

56.74265 -25.57902 24.73981

56.84668 -26.39453 25.60363

56.94513 -27.20994 26.4751

57.0374 -28.02439 27.35296

57.12435 -28.83587 28.23575

57.20616 -29.6432 29.12179

57.28189 -30.44518 30.00988

57.35233 -31.23957 30.89814

57.41677 -32.02615 31.78532

57.47579 -32.80399 32.66868

57.53071 -33.57279 33.54498

57.57919 -34.33084 34.41425

57.62232 -35.07822 35.27384

57.65837 -35.81399 36.12153

57.68876 -36.53741 36.95601

57.71339 -37.24826 37.77672

57.73345 -37.94443 38.58202

57.74798 -38.62608 39.37159

57.75812 -39.29169 40.1446

57.76478 -39.94052 40.90088

57.76781 -40.57251 41.63937

57.76793 -41.1867 42.36017

57.76586 -41.78241 43.06263

57.76192 -42.35909 43.74696

57.75602 -42.91721 44.41209

57.74958 -43.45595 45.0587

57.74185 -43.97564 45.68659

57.734 -44.47632 46.29517

57.72596 -44.95764 46.88492

57.7178 -45.41963 47.45603

57.71036 -45.86303 48.00787

57.70293 -46.28772 48.54123

57.69639 -46.69453 49.05627

57.69097 -47.0832 49.55273

57.68637 -47.45433 50.03157

57.68235 -47.8088 50.49258

57.6794 -48.14641 50.93589

57.67753 -48.46808 51.36247

57.67649 -48.77422 51.77188

57.67672 -49.06539 52.16536

57.6777 -49.34155 52.54282

57.68 -49.6042 52.90434

57.68273 -49.8535 53.25127

57.68645 -50.0893 53.58337

57.6912 -50.31317 53.90054

57.69637 -50.52538 54.20461

57.70205 -50.72617 54.49497

57.70896 -50.91624 54.77206

57.71592 -51.09592 55.03704

57.72342 -51.26579 55.2903

57.73185 -51.42612 55.53159

57.74004 -51.57811 55.76146

57.74883 -51.72113 55.98079

57.75743 -51.85631 56.1898

57.76674 -51.98428 56.38855

57.77609 -52.10464 56.57798

57.78524 -52.21839 56.7583

57.79491 -52.32565 56.9296

57.80416 -52.42686 57.093

57.81339 -52.52228 57.24795

57.82278 -52.61259 57.39553

57.83216 -52.69747 57.53551

57.84113 -52.77718 57.66903

57.85017 -52.85265 57.79515

57.85899 -52.92396 57.91522

57.8677 -52.99098 58.02934

57.87625 -53.05392 58.13776

57.88455 -53.11372 58.2407

57.89256 -53.1698 58.33797

57.90033 -53.22278 58.43061

57.90786 -53.2725 58.51842

57.91545 -53.32021 58.60155

57.92231 -53.36443 58.68077

57.92976 -53.40631 58.75562

57.93668 -53.44601 58.82655

57.94304 -53.48303 58.89445

57.94949 -53.51791 58.95855

57.9561 -53.55111 59.01958

57.96244 -53.58195 59.0775

57.96782 -53.61163 59.13199

57.97368 -53.63905 59.18407

57.97953 -53.66488 59.23366

57.98514 -53.68899 59.28061

57.99023 -53.71224 59.32529

57.99522 -53.73401 59.3671

57.99826 -53.75563 59.40601

58.00227 -53.77605 59.44294

58.00493 -53.79519 59.47804

58.00737 -53.81337 59.5107

58.00882 -53.83157 59.541

58.00953 -53.84917 59.5697

58.00922 -53.86649 59.59618

58.00832 -53.88333 59.62026

58.03754 -53.8982 59.6458

58.02679 -53.9138 59.6686

58.01647 -53.9291 59.6871

58.00634 -53.9443 59.703

57.99667 -53.9606 59.7174

57.98725 -53.97604 59.7299

57.97778 -53.9926 59.74068

57.96835 -54.00812 59.75027

57.95938 -54.02272 59.75931

57.95046 -54.03685 59.76715

57.94204 -54.05012 59.77455

57.93363 -54.063 59.78157

57.92549 -54.07508 59.78799

57.91737 -54.08683 59.79369

57.90974 -54.0981 59.79892

57.90236 -54.10861 59.80371

57.895 -54.11893 59.80857

57.8881 -54.12853 59.81238

57.88122 -54.13774 59.81608

57.87433 -54.14682 59.8195

57.86766 -54.15551 59.82286

57.86144 -54.1636 59.82575

57.85519 -54.1716 59.82841

57.84893 -54.17907 59.83064

57.84307 -54.18647 59.8329

57.83741 -54.19358 59.83499

57.83192 -54.20024 59.83669

57.8266 -54.20661 59.8387

57.82121 -54.21323 59.8399

57.8162 -54.21912 59.84143

57.81113 -54.22507 59.84286

# section 2

XYZ

240

56.39392 0.2174792 0.091503277

56.39389 0.2255621 0.092337623

56.39385 0.2338288 0.093706608

56.3938 0.2422665 0.095652342

56.39379 0.2508459 0.098197304

56.39376 0.2595019 0.1015732

56.39375 0.2680087 0.1061379

56.39387 0.2764284 0.1114821

56.39436 0.2845105 0.117822

56.39587 0.2918699 0.1251954

56.39956 0.297711 0.1336527

56.4052 0.3013177 0.1432633

56.41125 0.3027959 0.1538537

56.41755 0.3021591 0.1650997

56.42398 0.2994789 0.1767286

56.43042 0.2948284 0.1885256

56.43678 0.2882801 0.2003156

56.44297 0.2799557 0.2119664

56.44884 0.2697321 0.2230854

56.45403 0.2572235 0.2330179

56.45886 0.2431111 0.2424032

56.46392 0.2283836 0.2522967

56.46922 0.2130861 0.2628096

56.47478 0.1971058 0.2739015

56.48061 0.1802938 0.2854997

56.48674 0.1628227 0.297856

56.49316 0.1444775 0.3108414

56.49992 0.1251988 0.3244818

56.50702 0.1049536 0.3388493

56.51448 0.083671786 0.3539674

56.52232 0.061290625 0.3698796

56.53058 0.037746068 0.3866334

56.53925 0.012980892 0.4042966

56.54838 -0.013096715 0.4228918

56.55799 -0.040533021 0.4425243

56.56809 -0.069427148 0.4632241

56.57875 -0.099871323 0.485041

56.58995 -0.1319288 0.508088

56.60175 -0.1657117 0.5324066

56.6142 -0.2013217 0.5580685

56.62729 -0.2388471 0.5851839

56.64111 -0.2784181 0.6138031

56.65564 -0.3201262 0.6440632

56.67097 -0.3641224 0.6760094

56.68711 -0.4105024 0.7098007

56.70414 -0.4594362 0.7454858

56.72206 -0.511031 0.7832414

56.74097 -0.5654719 0.8231273

56.76087 -0.6228809 0.8653324

56.78188 -0.6834595 0.9099356

56.80397 -0.7473546 0.9571324

56.82726 -0.8147752 1.007031

56.85179 -0.8859076 1.059801

56.87758 -0.9609304 1.115659

56.90478 -1.04009 1.174714

56.93342 -1.123596 1.237178

56.96351 -1.211662 1.303297

56.99521 -1.304567 1.373205

57.02856 -1.402555 1.447148

57.06361 -1.505893 1.525355

57.10041 -1.61484 1.608121

57.13912 -1.729732 1.695619

57.17977 -1.850857 1.788145

57.22246 -1.978536 1.885978

57.26727 -2.113098 1.989407

57.31425 -2.254894 2.09874

57.36349 -2.404284 2.214296

57.41501 -2.56164 2.336448

57.46896 -2.727365 2.465469

57.52539 -2.901864 2.601746

57.58438 -3.085547 2.745652

57.64604 -3.27886 2.897532

57.71034 -3.482226 3.057869

57.77739 -3.696121 3.227031

57.84725 -3.921012 3.405443

57.91992 -4.15739 3.593541

57.99544 -4.405761 3.791776

58.07383 -4.666624 4.000602

58.15519 -4.940506 4.22044

58.23938 -5.227912 4.45186

58.32641 -5.529395 4.69529

58.41626 -5.845493 4.951215

58.50897 -6.176746 5.220091

58.60424 -6.523692 5.502482

58.70216 -6.886868 5.798818

58.80263 -7.266819 6.109562

58.90528 -7.664072 6.435234

59.01032 -8.079087 6.776256

59.11704 -8.512151 7.133493

59.22556 -8.963562 7.507486

59.33581 -9.433705 7.89865

59.44762 -9.92291 8.307458

59.56063 -10.43146 8.734383

59.67455 -10.95958 9.179873

59.78905 -11.50746 9.644317

59.90378 -12.07524 10.12806

60.01835 -12.66297 10.63143

60.13238 -13.27061 11.15472

60.24545 -13.89809 11.69815

60.35709 -14.54521 12.26189

60.46687 -15.21172 12.84603

60.57433 -15.89729 13.4506

60.67904 -16.60147 14.07556

60.78049 -17.3237 14.72079

60.87822 -18.06334 15.38612

60.97181 -18.81966 16.07123

61.06078 -19.59182 16.77576

61.14473 -20.37889 17.49924

61.22396 -21.18007 18.24076

61.29657 -21.99376 19.00039

61.36298 -22.819 19.777

61.42294 -23.65453 20.56973

61.47619 -24.49897 21.37762

61.52254 -25.35091 22.19965

61.56177 -26.20889 23.03467

61.59381 -27.07142 23.88148

61.61858 -27.93691 24.73882

61.6361 -28.8038 25.60533

61.64642 -29.67055 26.47958

61.6496 -30.53556 27.36009

61.64583 -31.39727 28.2454

61.63534 -32.25414 29.13393

61.61833 -33.10471 30.02416

61.59447 -33.94718 30.91476

61.56382 -34.78028 31.80406

61.52792 -35.60376 32.68944

61.48791 -36.41705 33.56871

61.44204 -37.21819 34.44108

61.39118 -38.00644 35.30463

61.33504 -38.78056 36.15817

61.27367 -39.53946 37.00047

61.20845 -40.28259 37.83019

61.14008 -41.00923 38.64608

61.06811 -41.7184 39.44739

60.99364 -42.40973 40.23298

60.91718 -43.08257 41.00219

60.83929 -43.73642 41.75437

60.76022 -44.37055 42.48919

60.68086 -44.98499 43.2059

60.6014 -45.57924 43.90428

60.52242 -46.15334 44.5839

60.44436 -46.70715 45.24454

60.36744 -47.24057 45.88617

60.29216 -47.75393 46.50844

60.21862 -48.24728 47.11135

60.14714 -48.72071 47.69511

60.07789 -49.17474 48.25951

60.01108 -49.6095 48.80487

59.94684 -50.02558 49.33115

59.88522 -50.4232 49.83876

59.82639 -50.80301 50.32773

59.77023 -51.16531 50.79855

59.71692 -51.51077 51.25135

59.66635 -51.83973 51.68663

59.61853 -52.15287 52.10466

59.57344 -52.45079 52.50575

59.53099 -52.73386 52.89051

59.4911 -53.00272 53.25925

59.45376 -53.25794 53.6124

59.41883 -53.50008 53.95041

59.38611 -53.72976 54.27365

59.3557 -53.94732 54.58281

59.32741 -54.15342 54.87818

59.30111 -54.34858 55.16023

59.2767 -54.5333 55.42943

59.25419 -54.70795 55.68639

59.2333 -54.87322 55.93132

59.21402 -55.02947 56.16479

59.19624 -55.17717 56.38721

59.17986 -55.31678 56.59905

59.16486 -55.44852 56.80082

59.15102 -55.57304 56.99276

59.1383 -55.69069 57.17535

59.12673 -55.80161 57.3491

59.11607 -55.90644 57.51424

59.10626 -56.00544 57.67113

59.09745 -56.09867 57.8204

59.08924 -56.18687 57.96203

59.0819 -56.26988 58.09674

59.07505 -56.34844 58.22447

59.06899 -56.42232 58.34592

59.06342 -56.49212 58.46116

59.05829 -56.55808 58.57047

59.0537 -56.62018 58.67429

59.0494 -56.67898 58.77264

59.04567 -56.73425 58.86613

59.04224 -56.78643 58.95477

59.03899 -56.83589 59.03872

59.03624 -56.88232 59.11852

59.03372 -56.92618 59.19417

59.03143 -56.96762 59.2659

59.02935 -57.00681 59.33388

59.02765 -57.04359 59.39851

59.02619 -57.0783 59.45984

59.02496 -57.11103 59.51803

59.02335 -57.14239 59.57283

59.02244 -57.1715 59.62516

59.0216 -57.19902 59.67476

59.02079 -57.22505 59.72172

59.01997 -57.24972 59.76618

59.01911 -57.27314 59.80821

59.01732 -57.29609 59.84739

59.01582 -57.31747 59.88455

59.01393 -57.33799 59.91942

59.01166 -57.35775 59.95208

59.00891 -57.37683 59.98262

59.00571 -57.3953 60.0111

59.002 -57.4132 60.03759

58.99774 -57.43063 60.06216

59.01888 -57.4444 60.0854

59.00697 -57.4594 60.1072

58.99525 -57.475 60.1263

58.98372 -57.4896 60.1416

58.9724 -57.5066 60.157

58.96134 -57.524 60.1706

58.95047 -57.54238 60.1826

58.93987 -57.5579 60.19191

58.92952 -57.57275 60.20044

58.91945 -57.5869 60.20822

58.90966 -57.60042 60.21532

58.90012 -57.61333 60.22181

58.89086 -57.62566 60.22771

58.88187 -57.63745 60.23311

58.87314 -57.64872 60.23804

58.86467 -57.65951 60.24254

58.85646 -57.66982 60.24664

58.8485 -57.67971 60.2504

58.84079 -57.68918 60.25381

58.8333 -57.69826 60.25694

58.82604 -57.70697 60.2598

58.81901 -57.71533 60.26241

58.81221 -57.72336 60.2648

58.80559 -57.73107 60.26698

58.79918 -57.73849 60.26898

58.79296 -57.74563 60.27081

58.78691 -57.75252 60.27247

58.78104 -57.75915 60.27399

58.77534 -57.76555 60.27539

58.76981 -57.77173 60.27667

58.76442 -57.77769 60.27784

# section 3

XYZ

240

65.92666 -0.6472106 -0.3310836

65.92673 -0.6387447 -0.329928

65.92679 -0.6301065 -0.3282018

65.92685 -0.6213217 -0.3258428

65.92693 -0.6124368 -0.3228059

65.92701 -0.6035413 -0.3188376

65.9271 -0.5949196 -0.31354

65.92728 -0.5864475 -0.3073927

65.92772 -0.5783498 -0.3001943

65.92896 -0.5708995 -0.2919515

65.93196 -0.564644 -0.2826701

65.93652 -0.560052 -0.2723203

65.94143 -0.5570344 -0.2610227

65.94654 -0.5556496 -0.2489701

65.95176 -0.5559251 -0.2363249

65.95699 -0.5578806 -0.2232341

65.96214 -0.5616007 -0.2098259

65.96717 -0.5671419 -0.1962201

65.97192 -0.5750499 -0.1828942

65.97605 -0.5865523 -0.1709545

65.97984 -0.6005193 -0.1598304

65.98377 -0.6152521 -0.1482657

65.98792 -0.6309358 -0.1363639

65.99223 -0.6474914 -0.1239779

65.99677 -0.664791 -0.1109113

66.00152 -0.6832368 -0.097456634

66.00648 -0.7026081 -0.083321437

66.01171 -0.7229642 -0.068471171

66.01721 -0.7443543 -0.052848518

66.02297 -0.7668438 -0.036415953

66.02906 -0.7904978 -0.019124044

66.03545 -0.8153906 -0.00093027751

66.04215 -0.8415847 0.018235192

66.04922 -0.8691657 0.038413629

66.05666 -0.8982064 0.059684556

66.06446 -0.9287974 0.082100309

66.0727 -0.961032 0.1057226

66.08137 -0.994998 0.1306417

66.09048 -1.0308 0.1569217

66.10009 -1.06855 0.1846386

66.11016 -1.108352 0.2138914

66.12082 -1.150333 0.2447537

66.13199 -1.194611 0.2773387

66.1438 -1.241326 0.3117268

66.1562 -1.29061 0.3480466

66.16927 -1.342617 0.3863861

66.18303 -1.397496 0.4268878

66.19756 -1.455416 0.469652

66.2128 -1.516544 0.5148323

66.22889 -1.581068 0.5625471

66.24578 -1.649171 0.6129641

66.2636 -1.721065 0.6662192

66.28231 -1.796953 0.7224801

66.30196 -1.877056 0.781934

66.32269 -1.961617 0.8447326

66.34444 -2.050874 0.9110757

66.36727 -2.14508 0.9811831

66.3913 -2.244513 1.055234

66.41655 -2.349453 1.133457

66.44307 -2.460196 1.216081

66.47085 -2.577051 1.303368

66.49999 -2.700347 1.395537

66.53054 -2.830421 1.492867

66.56255 -2.967622 1.595632

66.59602 -3.112316 1.704124

66.63107 -3.264895 1.81864

66.66772 -3.425758 1.939496

66.70592 -3.595313 2.067045

66.74582 -3.774015 2.201568

66.7874 -3.962288 2.343458

66.83071 -4.160602 2.493072

66.87584 -4.369434 2.650768

66.92265 -4.589275 2.816974

66.97123 -4.820634 2.992077

67.02157 -5.064028 3.176492

67.07368 -5.319998 3.370646

67.12752 -5.589094 3.574981

67.18304 -5.871864 3.789942

67.24036 -6.16888 4.015966

67.29913 -6.480702 4.253567

67.35939 -6.807918 4.503194

67.42107 -7.151115 4.765322

67.48412 -7.510869 5.04042

67.54818 -7.887755 5.329016

67.61326 -8.282348 5.631565

67.67918 -8.69521 5.94854

67.74556 -9.126894 6.280448

67.81254 -9.57791 6.627737

67.8792 -10.04859 6.99116

67.94564 -10.5393 7.371258

68.01172 -11.05044 7.768476

68.07717 -11.58235 8.183287

68.1416 -12.13532 8.616147

68.20465 -12.70962 9.067495

68.26586 -13.30541 9.537712

68.32484 -13.92282 10.02715

68.38113 -14.5619 10.53612

68.43425 -15.2226 11.06491

68.48373 -15.9048 11.61375

68.52908 -16.60829 12.1828

68.56976 -17.33276 12.77215

68.60529 -18.0778 13.38185

68.63515 -18.84293 14.01184

68.65883 -19.62749 14.66202

68.67583 -20.43077 15.33221

68.68568 -21.25194 16.0221

68.68796 -22.09007 16.73134

68.68217 -22.9441 17.45946

68.66878 -23.81321 18.20556

68.64568 -24.69549 18.96968

68.61346 -25.58996 19.75071

68.57189 -26.49521 20.54779

68.52076 -27.40972 21.35996

68.46 -28.33195 22.18619

68.38947 -29.26031 23.02532

68.30922 -30.19314 23.87615

68.21927 -31.12874 24.7374

68.11977 -32.06538 25.60771

68.01096 -33.0014 26.48564

67.89303 -33.93506 27.3697

67.76637 -34.86469 28.25841

67.63135 -35.78858 29.15017

67.48833 -36.70516 30.04347

67.33705 -37.6123 30.93702

67.17793 -38.50857 31.82929

67.01328 -39.39379 32.71781

66.84482 -40.26743 33.60051

66.67097 -41.12659 34.47715

66.49326 -41.97023 35.34637

66.31176 -42.7964 36.20758

66.12674 -43.60303 37.06033

65.93975 -44.39027 37.90258

65.75178 -45.15792 38.73259

65.56254 -45.90472 39.54964

65.37325 -46.63084 40.35217

65.18452 -47.33589 41.13916

64.99687 -48.01945 41.90981

64.8106 -48.68089 42.66363

64.62669 -49.32069 43.39955

64.44531 -49.93834 44.11729

64.26713 -50.53418 44.8162

64.09249 -51.10818 45.4959

63.92161 -51.6603 46.15631

63.75507 -52.19114 46.79697

63.59292 -52.70084 47.4178

63.43543 -53.18954 48.01892

63.28284 -53.65793 48.60007

63.13525 -54.10624 49.16155

62.99283 -54.53512 49.70329

62.85553 -54.94483 50.22565

62.72353 -55.33614 50.72869

62.59668 -55.70937 51.21287

62.47511 -56.06529 51.67833

62.35866 -56.40425 52.12558

62.24731 -56.72697 52.55491

62.14103 -57.03411 52.96666

62.03963 -57.32602 53.36141

61.943 -57.60343 53.73952

61.85109 -57.86693 54.10147

61.76369 -58.11703 54.44769

61.68062 -58.35442 54.77863

61.60181 -58.57943 55.09493

61.52708 -58.79274 55.39698

61.45627 -58.99489 55.68525

61.38921 -59.18638 55.96026

61.3258 -59.36759 56.22258

61.26579 -59.53922 56.47251

61.20908 -59.70164 56.71061

61.15551 -59.85532 56.93734

61.10492 -60.0007 57.15316

61.05718 -60.13805 57.35861

61.01212 -60.26798 57.55398

60.9696 -60.39085 57.73974

60.92956 -60.50685 57.91642

60.89177 -60.61655 58.08428

60.85611 -60.72026 58.2437

60.8226 -60.81807 58.39528

60.79092 -60.91063 58.53908

60.76118 -60.99789 58.67575

60.73304 -61.0805 58.80535

60.70667 -61.15833 58.92849

60.68178 -61.23189 59.04531

60.6583 -61.30145 59.15608

60.63622 -61.36703 59.26125

60.61534 -61.42915 59.36087

60.59579 -61.48763 59.45551

60.57734 -61.54289 59.54524

60.55986 -61.59526 59.6302

60.54353 -61.64454 59.71091

60.52809 -61.69112 59.78741

60.51354 -61.73516 59.85993

60.49977 -61.7769 59.92859

60.48689 -61.81618 59.99379

60.47473 -61.85334 60.0556

60.46327 -61.88847 60.11418

60.45216 -61.92198 60.16946

60.44186 -61.95345 60.22197

60.43204 -61.98328 60.27168

60.42266 -62.01157 60.31871

60.41367 -62.03843 60.36318

60.40504 -62.06393 60.40521

60.39637 -62.08844 60.44471

60.3879 -62.11172 60.48181

60.37947 -62.13399 60.51667

60.37108 -62.15533 60.54935

60.36266 -62.17583 60.57996

60.35418 -62.19553 60.60855

60.3456 -62.21453 60.63519

60.33687 -62.23287 60.65993

60.34719 -62.2484 60.6864

60.33354 -62.2637 60.7073

60.31994 -62.2805 60.7261

60.30645 -62.2971 60.7429

60.29314 -62.3151 60.7577

60.2801 -62.3315 60.7696

60.26731 -62.34786 60.78049

60.25482 -62.3634 60.7895

60.24266 -62.37831 60.7976

60.23085 -62.39258 60.8049

60.2194 -62.40624 60.8115

60.2083 -62.41932 60.81746

60.19753 -62.43183 60.82284

60.18713 -62.44382 60.82772

60.17706 -62.45528 60.83214

60.16732 -62.46627 60.83615

60.15791 -62.47678 60.83979

60.14882 -62.48685 60.8431

60.14003 -62.49652 60.8461

60.13154 -62.50578 60.84883

60.12332 -62.51467 60.85131

60.11539 -62.5232 60.85357

60.10772 -62.53141 60.85563

60.1003 -62.53929 60.85751

60.09311 -62.54687 60.85921

60.08616 -62.55417 60.86077

60.07942 -62.5612 60.86218

60.07289 -62.56798 60.86347

60.06656 -62.57452 60.86465

60.06042 -62.58084 60.86572

60.05446 -62.58694 60.8667

# section 4

XYZ

240

77.6241 -1.708256 -0.8496326

77.62429 -1.69932 -0.8480826

77.62448 -1.690226 -0.8459182

77.62468 -1.681016 -0.8430524

77.62489 -1.671757 -0.8394117

77.6251 -1.662568 -0.8347169

77.6253 -1.653805 -0.82852

77.62553 -1.645268 -0.8213869

77.62593 -1.63715 -0.8131345

77.62683 -1.629589 -0.8038252

77.62901 -1.622826 -0.7935328

77.63225 -1.617023 -0.7822754

77.63573 -1.612116 -0.77011

77.63938 -1.608251 -0.7570677

77.64311 -1.605576 -0.7431756

77.64687 -1.604226 -0.7284977

77.65054 -1.604475 -0.7131037

77.65415 -1.606601 -0.6970986

77.65752 -1.611667 -0.6810645

77.66035 -1.621936 -0.6666625

77.66285 -1.635724 -0.6534044

77.66543 -1.650463 -0.6397889

77.66813 -1.666621 -0.6261831

77.67091 -1.683882 -0.612209

77.67387 -1.70178 -0.5973405

77.67692 -1.721422 -0.5825378

77.6801 -1.742053 -0.5669922

77.68345 -1.763731 -0.5506573

77.68699 -1.786525 -0.5334941

77.69069 -1.810498 -0.5154491

77.69459 -1.835713 -0.4964637

77.69868 -1.86226 -0.476503

77.70299 -1.890208 -0.4554943

77.70753 -1.919633 -0.4333728

77.7123 -1.950643 -0.4100916

77.71729 -1.983316 -0.3855701

77.72257 -2.017748 -0.3597327

77.7281 -2.054055 -0.3325164

77.7339 -2.092336 -0.3038296

77.74004 -2.132711 -0.2735906

77.74643 -2.175307 -0.2417154

77.7532 -2.220245 -0.2081009

77.76025 -2.267676 -0.1726627

77.76772 -2.317728 -0.135278

77.77554 -2.370574 -0.09585575

77.78378 -2.426353 -0.054259229

77.79243 -2.485261 -0.010387857

77.80154 -2.547452 0.035908356

77.81107 -2.613142 0.084739774

77.82114 -2.682508 0.1362727

77.83167 -2.755776 0.1906406

77.84274 -2.833157 0.2480151

77.85434 -2.914881 0.3085597

77.86644 -3.001218 0.3724259

77.87922 -3.092408 0.4398175

77.89254 -3.188719 0.5109211

77.90644 -3.29046 0.5859228

77.92109 -3.397905 0.6650555

77.9364 -3.511375 0.7485321

77.95245 -3.631207 0.8365766

77.96912 -3.757763 0.9294102

77.98656 -3.891372 1.027312

78.00469 -4.032427 1.130535

78.02359 -4.181312 1.239354

78.04318 -4.338439 1.354058

78.06358 -4.50425 1.474934

78.08477 -4.679191 1.602292

78.10664 -4.863715 1.736465

78.12927 -5.058342 1.877739

78.15262 -5.263515 2.026518

78.17673 -5.479782 2.183134

78.20156 -5.707658 2.347967

78.22692 -5.947717 2.521376

78.25284 -6.200507 2.703768

78.27923 -6.466604 2.895549

78.30609 -6.746614 3.097135

78.33331 -7.041141 3.308954

78.36079 -7.350794 3.531444

78.38857 -7.676195 3.765059

78.41619 -8.01798 4.010244

78.4436 -8.376771 4.267474

78.47069 -8.753221 4.537213

78.49738 -9.147947 4.819946

78.52312 -9.561574 5.116157

78.5479 -9.994716 5.42633

78.57145 -10.44796 5.750952

78.59329 -10.9219 6.090513

78.61357 -11.41709 6.445492

78.63108 -11.93393 6.816507

78.6459 -12.47286 7.204094

78.65778 -13.0343 7.608741

78.66634 -13.61861 8.030917

78.67113 -14.2261 8.471063

78.67177 -14.85706 8.929597

78.66762 -15.51163 9.406898

78.6582 -16.18995 9.903314

78.64294 -16.89204 10.41916

78.62132 -17.61785 10.95471

78.59278 -18.3672 11.51018

78.55677 -19.13985 12.08574

78.51268 -19.93544 12.68149

78.45993 -20.75347 13.29748

78.39794 -21.59337 13.93365

78.32619 -22.45443 14.5899

78.24413 -23.3358 15.26605

78.15127 -24.23655 15.96182

78.04712 -25.15563 16.67684

77.93124 -26.09183 17.41064

77.80419 -27.04428 18.16237

77.66365 -28.01074 18.932

77.51038 -28.99016 19.71845

77.34423 -29.98096 20.52087

77.16502 -30.98145 21.33829

76.97282 -31.98995 22.16966

76.76762 -33.00466 23.01384

76.54956 -34.02375 23.8696

76.31884 -35.04536 24.73565

76.07576 -36.06761 25.61062

75.82076 -37.08863 26.49306

75.55424 -38.10653 27.38149

75.27676 -39.11948 28.27436

74.98895 -40.12564 29.1701

74.69129 -41.12319 30.06716

74.38366 -42.10971 30.96433

74.06689 -43.08347 31.86024

73.74426 -44.04447 32.75261

73.41818 -44.99215 33.63953

73.08725 -45.92252 34.52141

72.75391 -46.83413 35.39758

72.41859 -47.72415 36.26821

72.08184 -48.58935 37.13378

71.74544 -49.43071 37.99141

71.41072 -50.2487 38.83874

71.07756 -51.04168 39.67511

70.74741 -51.8105 40.49841

70.42091 -52.55506 41.30722

70.09856 -53.27508 42.10055

69.78075 -53.97002 42.87769

69.46854 -54.64094 43.63717

69.16212 -55.2873 44.37867

68.86218 -55.90982 45.10123

68.56904 -56.50859 45.80434

68.28288 -57.08367 46.4878

68.00432 -57.63596 47.15101

67.73346 -58.16571 47.79381

67.47043 -58.67314 48.41624

67.21558 -59.15918 49.01796

66.96886 -59.62409 49.59922

66.7305 -60.06868 50.15991

66.50033 -60.49324 50.70038

66.27856 -60.89867 51.2207

66.06493 -61.28529 51.72126

65.85962 -61.65407 52.20226

65.66234 -62.00528 52.6642

65.47305 -62.33975 53.1074

65.29166 -62.6582 53.53222

65.11792 -62.96098 53.93924

64.95169 -63.24888 54.32886

64.7928 -63.52252 54.70158

64.64103 -63.78242 55.0579

64.49615 -64.02924 55.39827

64.35797 -64.26342 55.72335

64.22626 -64.48557 56.03357

64.10082 -64.69629 56.32948

63.98142 -64.8961 56.61162

63.86783 -65.08535 56.88052

63.75982 -65.26479 57.13658

63.65718 -65.43478 57.38037

63.55968 -65.59579 57.61237

63.46711 -65.74826 57.83309

63.37921 -65.89249 58.04305

63.29584 -66.02905 58.24262

63.21677 -66.15834 58.43229

63.14177 -66.28054 58.61256

63.07069 -66.39624 58.78375

63.00333 -66.50573 58.94629

62.93951 -66.60914 59.10069

62.87903 -66.70705 59.24715

62.82178 -66.79954 59.38623

62.76753 -66.88711 59.51812

62.71622 -66.96977 59.64334

62.66763 -67.04796 59.76208

62.62162 -67.12196 59.87466

62.57808 -67.1918 59.98148

62.53687 -67.258 60.08268

62.4979 -67.32041 60.17873

62.46101 -67.37945 60.26979

62.42608 -67.4354 60.35599

62.39308 -67.48817 60.43781

62.3618 -67.53808 60.51537

62.33221 -67.58532 60.58885

62.30409 -67.63019 60.65833

62.27748 -67.67254 60.72424

62.2522 -67.71271 60.78664

62.2282 -67.75079 60.84568

62.20541 -67.78691 60.90157

62.1836 -67.8213 60.95431

62.16275 -67.85395 61.00415

62.14286 -67.88502 61.05125

62.12384 -67.91454 61.09574

62.10567 -67.94263 61.13777

62.08856 -67.96904 61.17765

62.07154 -67.99466 61.2147

62.05509 -68.01907 61.24953

62.03921 -68.04235 61.28225

62.0238 -68.06458 61.31293

62.00886 -68.08581 61.34166

61.9943 -68.10616 61.36848

61.98008 -68.12562 61.39345

61.97712 -68.14088 61.42913

61.96133 -68.15908 61.44877

61.94543 -68.17702 61.46573

61.92952 -68.19463 61.48041

61.91379 -68.2118 61.49319

61.89832 -68.22848 61.50436

61.88317 -68.24458 61.51415

61.86837 -68.26013 61.52275

61.85398 -68.27512 61.53035

61.84005 -68.28954 61.53708

61.82657 -68.30338 61.54306

61.81353 -68.31667 61.54837

61.80093 -68.3294 61.55311

61.78878 -68.34161 61.55735

61.77707 -68.35332 61.56115

61.76577 -68.36455 61.56456

61.75489 -68.37527 61.56762

61.74441 -68.38561 61.57038

61.7343 -68.39552 61.57287

61.72457 -68.40498 61.5751

61.71519 -68.41411 61.57713

61.70614 -68.42285 61.57896

61.69741 -68.43127 61.58062

61.689 -68.43937 61.58211

61.68087 -68.44713 61.58347

61.67301 -68.45463 61.58469

61.66542 -68.46185 61.58579

61.65808 -68.4688 61.5868

61.65097 -68.47552 61.5877

61.64409 -68.48201 61.58852

61.63743 -68.48827 61.58926

# section 5

XYZ

240

90.22175 -2.069101 -1.115859

90.22197 -2.059491 -1.11401

90.2222 -2.049732 -1.111479

90.22242 -2.039873 -1.108161

90.22268 -2.030006 -1.103964

90.22292 -2.020284 -1.09857

90.22313 -2.011168 -1.091463

90.22333 -2.002455 -1.083277

90.22353 -1.994434 -1.073796

90.22399 -1.987347 -1.063068

90.22515 -1.981546 -1.051197

90.22684 -1.977207 -1.038432

90.22869 -1.974166 -1.025038

90.23065 -1.972494 -1.011138

90.23267 -1.972329 -0.9968656

90.23468 -1.973746 -0.9823227

90.23663 -1.976847 -0.9674478

90.23862 -1.981739 -0.9521064

90.24043 -1.989326 -0.9365984

90.24186 -2.001675 -0.9223142

90.24303 -2.017318 -0.9089048

90.24421 -2.034004 -0.8951379

90.24545 -2.052204 -0.8813888

90.2467 -2.071608 -0.8672715

90.24805 -2.091755 -0.852248

90.24943 -2.113761 -0.837303

90.25083 -2.136877 -0.8216079

90.25232 -2.161165 -0.8051161

90.25391 -2.186703 -0.7877874

90.25555 -2.21356 -0.7695679

90.25727 -2.241811 -0.7504027

90.25909 -2.271551 -0.7302458

90.26101 -2.302859 -0.7090333

90.26302 -2.335824 -0.6866977

90.26514 -2.37056 -0.66319

90.26733 -2.407159 -0.6384296

90.26967 -2.445729 -0.6123404

90.27208 -2.486396 -0.5848562

90.27459 -2.529276 -0.5558877

90.27725 -2.574497 -0.5253503

90.27996 -2.622205 -0.4931599

90.28285 -2.672535 -0.4592125

90.2858 -2.725656 -0.4234224

90.28893 -2.781713 -0.3856667

90.29216 -2.840891 -0.3458497

90.29558 -2.903355 -0.303837

90.29911 -2.969312 -0.2595219

90.30283 -3.038948 -0.2127573

90.30664 -3.112492 -0.1634255

90.31065 -3.190148 -0.1113634

90.31479 -3.272165 -0.05643291

90.31912 -3.358779 0.001537445

90.32356 -3.450253 0.062712803

90.32809 -3.546877 0.1272529

90.33288 -3.648919 0.1953621

90.3377 -3.756687 0.2672284

90.34264 -3.870513 0.3430431

90.34782 -3.990706 0.4230399

90.35313 -4.117625 0.5074358

90.3586 -4.251637 0.5964631

90.36409 -4.393141 0.6903506

90.36968 -4.542515 0.7893718

90.37532 -4.700187 0.8937859

90.38093 -4.866589 1.003875

90.38647 -5.042175 1.119932

90.39202 -5.227425 1.242255

90.39752 -5.422832 1.371161

90.40283 -5.628897 1.506993

90.40797 -5.846184 1.650042

90.41279 -6.0752 1.800715

90.41734 -6.316534 1.959353

90.42152 -6.570761 2.126344

90.42504 -6.838497 2.302066

90.42784 -7.120349 2.486933

90.4298 -7.416948 2.681361

90.43088 -7.728947 2.885782

90.43092 -8.057005 3.100637

90.42971 -8.401785 3.326377

90.42726 -8.763968 3.563468

90.42295 -9.144225 3.812382

90.41666 -9.543236 4.073605

90.40829 -9.961689 4.34763

90.39763 -10.40026 4.634953

90.384 -10.8596 4.93609

90.36736 -11.34036 5.251541

90.34729 -11.84318 5.581829

90.32327 -12.36863 5.92748

90.29543 -12.91735 6.288977

90.26225 -13.48971 6.666965

90.22381 -14.08622 7.061945

90.17971 -14.70737 7.47437

90.12949 -15.35356 7.904667

90.07264 -16.02515 8.353234

90.00868 -16.72242 8.820481

89.93681 -17.44553 9.306769

89.85647 -18.19459 9.812426

89.767 -18.96961 10.33774

89.66779 -19.77052 10.88295

89.55817 -20.59712 11.44825

89.43757 -21.44912 12.03376

89.30527 -22.3261 12.63955

89.16055 -23.2275 13.2656

89.00282 -24.15266 13.91184

88.83147 -25.10079 14.57809

88.64597 -26.07096 15.26412

88.44572 -27.06211 15.96958

88.23027 -28.07307 16.69403

87.99907 -29.10249 17.43696

87.75291 -30.14944 18.19748

87.48914 -31.21138 18.97538

87.20876 -32.28714 19.7696

86.91164 -33.37498 20.5792

86.59767 -34.47302 21.40314

86.26702 -35.57939 22.24033

85.91985 -36.6921 23.08957

85.55636 -37.80911 23.94958

85.17695 -38.92834 24.81901

84.7821 -40.04771 25.69646

84.37244 -41.16515 26.58046

83.94859 -42.27854 27.46948

83.51134 -43.38586 28.36198

83.06155 -44.48505 29.25635

82.59991 -45.57405 30.15107

82.12634 -46.6501 31.04485

81.64209 -47.71129 31.93639

81.15142 -48.75779 32.82372

80.65746 -49.78913 33.70514

80.15858 -50.80074 34.58105

79.65785 -51.79115 35.45106

79.15569 -52.75714 36.31553

78.65244 -53.69484 37.17527

78.15053 -54.60545 38.02746

77.65188 -55.48972 38.86962

77.15643 -56.34573 39.70115

76.66611 -57.17459 40.51991

76.18185 -57.97627 41.32444

75.70426 -58.75041 42.1138

75.23389 -59.49651 42.88726

74.77213 -60.21586 43.64331

74.31926 -60.90792 44.38161

73.87621 -61.57363 45.10116

73.44331 -62.21303 45.80149

73.02084 -62.8263 46.48235

72.60963 -63.41453 47.14312

72.2098 -63.97806 47.78362

71.82146 -64.51716 48.40389

71.44518 -65.03297 49.00356

71.08074 -65.52578 49.58287

70.72853 -65.99655 50.14172

70.38827 -66.44559 50.68045

70.06022 -66.87399 51.1991

69.74406 -67.2821 51.69808

69.43996 -67.67103 52.17755

69.14754 -68.04109 52.63802

68.86673 -68.39323 53.07981

68.59743 -68.72826 53.50326

68.33922 -69.04655 53.90897

68.09196 -69.34901 54.29733

67.85537 -69.6363 54.66883

67.6292 -69.90906 55.02396

67.4131 -70.16798 55.3632

67.20673 -70.4135 55.68717

67.00984 -70.6463 55.99636

66.82213 -70.86704 56.29124

66.64325 -71.07629 56.57239

66.47286 -71.27444 56.84034

66.31068 -71.46223 57.09549

66.1564 -71.64012 57.3384

66.00969 -71.80858 57.56958

65.87023 -71.96806 57.78948

65.73766 -72.1189 57.99868

65.61178 -72.26171 58.19752

65.49226 -72.39691 58.38648

65.37876 -72.52468 58.56608

65.2711 -72.64564 58.73663

65.16895 -72.76011 58.89855

65.07207 -72.86823 59.05238

64.9802 -72.9706 59.19829

64.89311 -73.06729 59.33686

64.81056 -73.15885 59.46824

64.73234 -73.24529 59.59299

64.65821 -73.32705 59.7113

64.588 -73.40442 59.82346

64.52145 -73.47747 59.92989

64.45844 -73.54669 60.03072

64.39877 -73.61198 60.12642

64.34224 -73.67374 60.21715

64.28872 -73.73227 60.30304

64.23805 -73.78748 60.38457

64.19002 -73.83971 60.46185

64.14455 -73.88917 60.53509

64.1014 -73.93613 60.60432

64.0605 -73.98043 60.67001

64.02169 -74.02248 60.7322

63.98484 -74.06232 60.79105

63.94995 -74.10011 60.84678

63.91663 -74.13607 60.89939

63.8849 -74.1702 60.94913

63.8547 -74.20263 60.99616

63.82594 -74.23347 61.0406

63.79859 -74.26276 61.08263

63.77286 -74.29028 61.12258

63.74776 -74.31689 61.15979

63.72373 -74.34219 61.19487

63.70075 -74.36628 61.22792

63.67874 -74.38922 61.25901

63.65765 -74.41106 61.28822

63.63738 -74.43192 61.31563

63.61787 -74.45181 61.34128

63.60542 -74.46951 61.37387

63.58629 -74.48747 61.39533

63.56732 -74.50512 61.41413

63.54858 -74.52245 61.43065

63.53024 -74.53934 61.44522

63.51232 -74.55579 61.45811

63.49488 -74.57167 61.46955

63.47791 -74.58704 61.47969

63.46149 -74.60188 61.48872

63.44564 -74.61619 61.49678

63.43032 -74.62994 61.50399

63.41555 -74.64317 61.51041

63.40128 -74.65589 61.51619

63.38755 -74.66811 61.52136

63.37432 -74.67984 61.526

63.36158 -74.69113 61.53017

63.34931 -74.70194 61.53391

63.33751 -74.71235 61.53727

63.32614 -74.72237 61.54031

63.31518 -74.73196 61.54302

63.30463 -74.74122 61.54545

63.29445 -74.75011 61.54766

63.28464 -74.75867 61.54963

63.27518 -74.76692 61.5514

63.26605 -74.77486 61.55298

63.25722 -74.78254 61.55441

63.2487 -74.78993 61.55568

63.24046 -74.79705 61.55682

63.23249 -74.80396 61.55783

63.22477 -74.81063 61.55873

63.21729 -74.81709 61.55953

# section 6

XYZ

240

101.9561 -1.664808 -1.087105

101.9562 -1.654411 -1.085095

101.9564 -1.643864 -1.08232

101.9566 -1.633222 -1.078671

101.9568 -1.622594 -1.074042

101.9569 -1.612168 -1.068076

101.957 -1.602509 -1.060169

101.9571 -1.593478 -1.050991

101.957 -1.585577 -1.040245

101.957 -1.579443 -1.027921

101.957 -1.576085 -1.01416

101.9572 -1.575968 -0.9995765

101.9574 -1.57861 -0.9848568

101.9577 -1.583846 -0.9704531

101.958 -1.591641 -0.9568301

101.9582 -1.601832 -0.9442388

101.9585 -1.613992 -0.9324265

101.9589 -1.627701 -0.920829

101.9592 -1.643008 -0.9091021

101.9593 -1.660562 -0.8975633

101.9593 -1.679888 -0.8860492

101.9593 -1.700247 -0.8740944

101.9592 -1.721847 -0.8618298

101.9592 -1.744617 -0.8490837

101.9591 -1.768432 -0.835624

101.9591 -1.793745 -0.8218151

101.959 -1.82033 -0.8073075

101.9589 -1.848264 -0.7920657

101.9588 -1.877622 -0.7760301

101.9587 -1.90849 -0.7591628

101.9586 -1.940963 -0.7414226

101.9585 -1.975126 -0.7227365

101.9583 -2.011083 -0.7030619

101.9582 -2.048944 -0.6823463

101.958 -2.088812 -0.6605083

101.9578 -2.130808 -0.6374919

101.9576 -2.17506 -0.6132361

101.9574 -2.221689 -0.5876411

101.9571 -2.270842 -0.5606461

101.9568 -2.322666 -0.5321725

101.9563 -2.377308 -0.5021164

101.9559 -2.434942 -0.4704049

101.9553 -2.49573 -0.4369181

101.9548 -2.559865 -0.4015765

101.9541 -2.627524 -0.3642412

101.9533 -2.698923 -0.3248265

101.9524 -2.774261 -0.2831784

101.9515 -2.853776 -0.2391983

101.9504 -2.937688 -0.1927151

101.9492 -3.026261 -0.1436187

101.9478 -3.119742 -0.091729254

101.9463 -3.218417 -0.036909405

101.9446 -3.322572 0.021015055

101.9426 -3.432494 0.082253791

101.9404 -3.548519 0.1469563

101.9379 -3.670974 0.2153339

101.9351 -3.8002 0.2876178

101.9321 -3.936582 0.3639845

101.9287 -4.080496 0.4446817

101.925 -4.23234 0.5299568

101.9207 -4.392515 0.6200983

101.916 -4.561486 0.7153106

101.9107 -4.739699 0.8158909

101.9047 -4.927628 0.9221321

101.898 -5.125764 1.034345

101.8906 -5.334625 1.152851

101.8824 -5.554744 1.277985

101.8731 -5.786642 1.410142

101.8629 -6.030941 1.549601

101.8515 -6.288207 1.696778

101.8388 -6.559058 1.85205

101.8248 -6.844136 2.0158

101.809 -7.144038 2.188513

101.7914 -7.459442 2.370594

101.7718 -7.791022 2.562493

101.75 -8.139473 2.764675

101.726 -8.505497 2.97762

101.6993 -8.889796 3.201814

101.67 -9.293118 3.437725

101.6374 -9.716103 3.685942

101.6011 -10.1595 3.94695

101.5611 -10.62403 4.221301

101.5171 -11.11042 4.5095

101.4684 -11.6193 4.812157

101.4147 -12.15139 5.129771

101.3556 -12.70733 5.462914

101.2905 -13.2877 5.812201

101.2195 -13.89322 6.178071

101.1408 -14.52411 6.561361

101.0545 -15.18099 6.962495

100.9601 -15.86444 7.381818

100.8569 -16.57489 7.819684

100.7445 -17.31278 8.276427

100.6223 -18.07839 8.752439

100.4893 -18.87185 9.248065

100.3448 -19.69327 9.76358

100.1881 -20.54267 10.29922

100.0186 -21.41993 10.85518

99.83539 -22.32484 11.4316

99.63793 -23.25709 12.02852

99.42538 -24.21618 12.64592

99.19698 -25.20153 13.2837

98.95197 -26.21239 13.94168

98.68974 -27.24789 14.61961

98.40971 -28.30703 15.31712

98.11129 -29.38867 16.03378

97.7939 -30.49148 16.76903

97.457 -31.61403 17.52221

97.10155 -32.75528 18.29245

96.72459 -33.91245 19.07924

96.32731 -35.08426 19.8815

95.90958 -36.26879 20.6982

95.47141 -37.46399 21.5282

95.01303 -38.6678 22.37033

94.53474 -39.87802 23.22332

94.03686 -41.09241 24.08583

93.51989 -42.30866 24.95647

92.98453 -43.52448 25.8338

92.43156 -44.73759 26.71632

91.86186 -45.94565 27.60249

91.27641 -47.14641 28.49078

90.67626 -48.33759 29.37959

90.06235 -49.51688 30.26743

89.43459 -50.68124 31.15289

88.79462 -51.82865 32.03467

88.14756 -52.95943 32.91117

87.4972 -54.07327 33.78096

86.84147 -55.16532 34.64399

86.18384 -56.23444 35.49984

85.5245 -57.27731 36.34872

84.8634 -58.28972 37.19144

84.20372 -59.27274 38.02574

83.54812 -60.22712 38.84941

82.89652 -61.15067 39.66193

82.25155 -62.04455 40.46142

81.61443 -62.90858 41.24667

80.98597 -63.74231 42.01686

80.36694 -64.54516 42.77135

79.75919 -65.31853 43.50879

79.16305 -66.06184 44.22886

78.57983 -66.77612 44.93066

78.0099 -67.46138 45.6138

77.4537 -68.11784 46.27807

76.91228 -68.74676 46.92286

76.38582 -69.34855 47.54799

75.87449 -69.92347 48.15356

75.379 -70.47292 48.73917

74.89912 -70.99717 49.30509

74.43531 -71.49734 49.85118

73.98722 -71.97377 50.37783

73.55519 -72.4277 50.88501

73.13882 -72.85959 51.37317

72.7383 -73.27067 51.8424

72.35316 -73.66129 52.2932

71.98329 -74.03255 52.72588

71.62856 -74.38532 53.14076

71.28843 -74.72008 53.53841

70.9627 -75.03782 53.9192

70.65102 -75.33926 54.28361

70.35302 -75.62512 54.63209

70.0683 -75.89623 54.96508

69.79636 -76.15299 55.28323

69.5369 -76.39619 55.58698

69.28951 -76.62658 55.87679

69.05374 -76.84478 56.15316

68.82914 -77.05119 56.41668

68.61534 -77.24667 56.6677

68.41196 -77.43167 56.90675

68.21851 -77.60674 57.13432

68.03462 -77.77236 57.35088

67.8598 -77.92885 57.55698

67.69379 -78.07695 57.75291

67.53614 -78.21705 57.93916

67.38642 -78.34936 58.11625

67.24438 -78.47455 58.28445

67.10964 -78.59295 58.44418

66.9818 -78.7047 58.596

66.86057 -78.81049 58.74002

66.74564 -78.91033 58.87685

66.63669 -79.00486 59.00661

66.53343 -79.09403 59.12986

66.43559 -79.17834 59.24678

66.3429 -79.2581 59.35762

66.25504 -79.33339 59.46286

66.17184 -79.4047 59.56254

66.09304 -79.47192 59.65721

66.01837 -79.53551 59.74696

65.94768 -79.59577 59.83194

65.88074 -79.65257 59.91263

65.81731 -79.7063 59.98914

65.75724 -79.75714 60.06166

65.70034 -79.80536 60.13027

65.64642 -79.85083 60.19543

65.59532 -79.89388 60.25717

65.54689 -79.93464 60.31566

65.501 -79.97338 60.37098

65.45744 -80.00996 60.42346

65.41608 -80.04465 60.47314

65.37684 -80.07756 60.52019

65.33958 -80.10876 60.56472

65.30422 -80.13838 60.6069

65.27073 -80.16646 60.64681

65.23869 -80.19321 60.68443

65.20816 -80.21863 60.71999

65.17909 -80.24282 60.75357

65.15139 -80.26581 60.78526

65.12498 -80.28771 60.81517

65.09978 -80.30859 60.84335

65.07567 -80.3285 60.86986

65.05692 -80.34545 60.90119

65.03411 -80.36379 60.92374

65.01197 -80.38162 60.94422

64.99046 -80.3989 60.96279

64.96967 -80.41565 60.97963

64.94954 -80.43187 60.99491

64.93009 -80.44751 61.00876

64.91129 -80.46262 61.02131

64.89315 -80.47721 61.03268

64.87569 -80.49127 61.04296

64.85885 -80.50481 61.05228

64.84263 -80.51787 61.0607

64.827 -80.53044 61.06832

64.81193 -80.54255 61.0752

64.79744 -80.55421 61.08141

64.78348 -80.56544 61.08704

64.77002 -80.57623 61.09209

64.75706 -80.58665 61.09665

64.7446 -80.59668 61.10077

64.73257 -80.60633 61.10445

64.72098 -80.61567 61.10777

64.70979 -80.62464 61.11076

64.699 -80.63331 61.11343

64.68859 -80.64168 61.11583

64.67854 -80.64975 61.11797

64.66882 -80.65757 61.11988

64.65942 -80.66512 61.12157

64.65034 -80.67239 61.12308

64.64155 -80.67947 61.12441

64.63303 -80.68632 61.12558

64.62477 -80.69294 61.12661

# section 7

XYZ

240

111.5189 -1.335334 -1.063672

111.519 -1.324297 -1.061531

111.5191 -1.313106 -1.058558

111.5192 -1.301825 -1.054638

111.5193 -1.290578 -1.049658

111.5194 -1.279577 -1.043226

111.5195 -1.269476 -1.034667

111.5194 -1.260187 -1.02468

111.5192 -1.252382 -1.012904

111.5187 -1.247027 -0.9992794

111.5178 -1.245658 -0.9839764

111.5167 -1.248981 -0.9679122

111.5156 -1.256256 -0.9521119

111.5145 -1.267121 -0.9372977

111.5134 -1.281402 -0.9242037

111.5123 -1.298744 -0.9132028

111.5112 -1.318287 -0.9038863

111.5102 -1.339181 -0.8953399

111.5092 -1.360779 -0.8866945

111.5083 -1.382576 -0.8773927

111.5073 -1.404904 -0.8674232

111.5063 -1.428254 -0.8569453

111.5053 -1.452626 -0.8458905

111.5041 -1.478139 -0.8342619

111.503 -1.504944 -0.8220766

111.5017 -1.532951 -0.8091934

111.5004 -1.562363 -0.7956536

111.499 -1.593269 -0.7814306

111.4976 -1.625739 -0.7664487

111.496 -1.659876 -0.7506832

111.4944 -1.695789 -0.7341046

111.4927 -1.733557 -0.716617

111.4909 -1.773304 -0.6981956

111.489 -1.815154 -0.6788002

111.487 -1.859204 -0.6583229

111.4849 -1.905598 -0.6367278

111.4826 -1.954482 -0.613966

111.4802 -2.00597 -0.5899106

111.4776 -2.060234 -0.5645241

111.4749 -2.117439 -0.5377321

111.4719 -2.177732 -0.5094157

111.4688 -2.241318 -0.4795262

111.4653 -2.308355 -0.4479163

111.4617 -2.379072 -0.414542

111.4578 -2.453643 -0.3792292

111.4537 -2.532324 -0.3419318

111.4492 -2.615306 -0.302457

111.4445 -2.702873 -0.2607462

111.4394 -2.795234 -0.2165844

111.434 -2.892703 -0.1699049

111.4281 -2.995527 -0.1204937

111.4218 -3.104031 -0.068241276

111.4151 -3.218519 -0.012966125

111.4078 -3.339278 0.045582283

111.3999 -3.466699 0.1075085

111.3915 -3.601124 0.173043

111.3823 -3.742899 0.2424496

111.3726 -3.892474 0.315858

111.3621 -4.050239 0.3935409

111.3509 -4.216615 0.4757583

111.3387 -4.392005 0.562847

111.3256 -4.576947 0.6549552

111.3114 -4.7719 0.7524112

111.296 -4.977372 0.8555167

111.2793 -5.193884 0.9645978

111.2612 -5.421988 1.079992

111.2418 -5.662245 1.202053

111.2207 -5.915197 1.331214

111.198 -6.181509 1.467748

111.1733 -6.461795 1.612075

111.1466 -6.756701 1.764605

111.1178 -7.066919 1.925714

111.0863 -7.393036 2.095975

111.0521 -7.735783 2.275785

111.0149 -8.095871 2.465623

110.9745 -8.474028 2.665981

110.9308 -8.870992 2.877369

110.8834 -9.287498 3.100302

110.8322 -9.724342 3.335253

110.7764 -10.18215 3.582902

110.7157 -10.66172 3.843734

110.65 -11.1638 4.118352

110.5789 -11.68916 4.407264

110.5015 -12.23841 4.71116

110.4176 -12.81233 5.030536

110.3267 -13.41156 5.366008

110.2281 -14.03669 5.718256

110.1219 -14.68849 6.087692

110.0062 -15.36709 6.475302

109.8809 -16.07317 6.88145

109.7455 -16.80738 7.306396

109.5992 -17.57021 7.750429

109.4415 -18.36213 8.213834

109.2717 -19.18343 8.696992

109.0889 -20.03421 9.200225

108.8921 -20.91461 9.723777

108.6807 -21.82461 10.26784

108.4538 -22.76411 10.83256

108.2107 -23.73284 11.41803

107.9506 -24.73048 12.02425

107.6727 -25.7565 12.65111

107.3761 -26.81025 13.29845

107.0599 -27.89095 13.96601

106.7237 -28.99765 14.65344

106.3666 -30.1293 15.36032

105.9882 -31.28468 16.0861

105.5877 -32.46235 16.83014

105.1647 -33.66079 17.59169

104.7202 -34.87889 18.36985

104.2509 -36.11366 19.16389

103.7584 -37.36375 19.9727

103.2424 -38.62708 20.79518

102.703 -39.90146 21.63011

102.1405 -41.18467 22.47627

101.5554 -42.47435 23.33232

100.948 -43.7681 24.19687

100.3189 -45.06341 25.06849

99.66903 -46.35785 25.94572

98.99929 -47.64891 26.82704

98.31071 -48.93412 27.71089

97.60449 -50.21104 28.59574

96.88184 -51.47718 29.48003

96.14381 -52.73005 30.36226

95.3904 -53.96638 31.24095

94.62353 -55.18406 32.11477

93.84901 -56.38353 32.98244

93.07119 -57.56458 33.84275

92.28763 -58.72219 34.69528

91.50214 -59.85546 35.53961

90.71471 -60.96097 36.37577

89.92497 -62.03429 37.20462

89.13673 -63.07629 38.02434

88.35321 -64.0878 38.83295

87.57438 -65.0664 39.62999

86.80336 -66.01328 40.41376

86.04166 -66.92814 41.18329

85.29027 -67.81042 41.93786

84.55008 -68.65951 42.67688

83.82335 -69.47691 43.39917

83.11047 -70.26197 44.10439

82.413 -71.01585 44.79171

81.73141 -71.73847 45.46085

81.06622 -72.43014 46.11161

80.41869 -73.09222 46.74335

79.78905 -73.72518 47.35598

79.17747 -74.3293 47.94957

78.58484 -74.90616 48.52371

78.01089 -75.45603 49.07872

77.45612 -75.98016 49.61442

76.92017 -76.4789 50.13122

76.40339 -76.95366 50.62906

75.90536 -77.40491 51.10839

75.42627 -77.83404 51.56927

74.96558 -78.24142 52.0122

74.52313 -78.62825 52.43746

74.09877 -78.99551 52.84534

73.69187 -79.34367 53.23643

73.30219 -79.67384 53.61106

72.92932 -79.98683 53.96968

72.57278 -80.28339 54.31274

72.23212 -80.56442 54.64064

71.90676 -80.83033 54.95405

71.5963 -81.08201 55.25337

71.30027 -81.32027 55.53903

71.01816 -81.54575 55.81153

70.74937 -81.7589 56.07143

70.49352 -81.96065 56.31908

70.25011 -82.15146 56.55498

70.01859 -82.3319 56.77962

69.79849 -82.50253 56.99346

69.58924 -82.66363 57.19703

69.39051 -82.81603 57.39058

69.20178 -82.96012 57.57463

69.02255 -83.09612 57.74966

68.85252 -83.22475 57.91595

68.69118 -83.34638 58.0739

68.53811 -83.46108 58.22409

68.39298 -83.56967 58.36657

68.25536 -83.67207 58.50199

68.12489 -83.76901 58.63041

68.00124 -83.86041 58.75245

67.88405 -83.9468 58.86823

67.77306 -84.02852 58.978

67.66781 -84.10561 59.08226

67.56816 -84.17863 59.18101

67.47377 -84.24745 59.27485

67.38432 -84.31252 59.36378

67.29964 -84.37418 59.44802

67.21945 -84.43227 59.52804

67.14346 -84.48723 59.60391

67.0715 -84.53921 59.67585

67.00339 -84.58844 59.74395

66.93887 -84.63486 59.80869

66.87775 -84.67873 59.87006

66.81987 -84.72024 59.92825

66.76501 -84.75974 59.98325

66.71312 -84.79686 60.03561

66.66392 -84.832 60.08525

66.6173 -84.86528 60.13231

66.5731 -84.89679 60.17692

66.53124 -84.92669 60.21921

66.49141 -84.95522 60.25911

66.45372 -84.98208 60.29706

66.41789 -85.00759 60.33298

66.38386 -85.03186 60.36702

66.35152 -85.0549 60.3992

66.32079 -85.07684 60.42966

66.29155 -85.09775 60.45846

66.2637 -85.11766 60.48569

66.2398 -85.134 60.516

66.214 -85.15266 60.53944

66.18928 -85.17061 60.56127

66.1655 -85.18787 60.58152

66.14272 -85.20449 60.60022

66.1208 -85.22053 60.61744

66.09971 -85.23598 60.63326

66.07941 -85.25089 60.64777

66.05988 -85.26527 60.66103

66.04109 -85.27913 60.67314

66.02302 -85.29251 60.68417

66.00562 -85.30541 60.6942

65.98887 -85.31786 60.70334

65.97272 -85.32988 60.71162

65.9572 -85.34147 60.71911

65.94224 -85.35265 60.72591

65.92783 -85.36344 60.73203

65.91393 -85.37386 60.73757

65.90057 -85.3839 60.74258

65.88766 -85.39362 60.74706

65.87523 -85.40299 60.75109

65.86321 -85.41206 60.75472

65.85163 -85.4208 60.75797

65.84045 -85.42927 60.76088

65.82964 -85.43745 60.76346

65.81919 -85.44537 60.76577

65.80909 -85.45304 60.76781

65.79932 -85.46046 60.76961

65.78985 -85.46767 60.7712

65.78068 -85.47466 60.7726

65.77178 -85.48142 60.77382

# section 8

XYZ

240

118.5829 -1.09196 -1.046361

118.583 -1.080443 -1.044124

118.5826 -1.06878 -1.041002

118.5832 -1.057027 -1.036889

118.5828 -1.045324 -1.031647

118.583 -1.033897 -1.024866

118.583 -1.023471 -1.015826

118.5828 -1.013991 -1.005243

118.5827 -1.006252 -0.9927059

118.5817 -1.001474 -0.9781231

118.5802 -1.001576 -0.9616792

118.578 -1.007445 -0.9445215

118.5762 -1.018142 -0.9279251

118.5742 -1.033158 -0.9128047

118.5718 -1.052235 -0.9001042

118.5697 -1.074857 -0.8902755

118.5675 -1.099853 -0.8828046

118.5653 -1.126059 -0.8765112

118.5637 -1.152302 -0.870144

118.5622 -1.177229 -0.8624917

118.5603 -1.201776 -0.8536635

118.5585 -1.227344 -0.8442788

118.5565 -1.253761 -0.8341165

118.5547 -1.281296 -0.8233142

118.5529 -1.310314 -0.8120695

118.5508 -1.340303 -0.7998686

118.5483 -1.371807 -0.7870459

118.5464 -1.404905 -0.7735751

118.5437 -1.43968 -0.7593718

118.541 -1.476232 -0.7444199

118.5383 -1.514683 -0.7286987

118.5356 -1.555115 -0.712095

118.5325 -1.597664 -0.6946005

118.529 -1.642461 -0.6761804

118.5259 -1.6896 -0.6567089

118.522 -1.739241 -0.6361635

118.5187 -1.791544 -0.6145042

118.5146 -1.846625 -0.591586

118.5102 -1.90467 -0.5673888

118.5059 -1.965844 -0.5418391

118.5007 -2.030304 -0.5148082

118.4958 -2.098298 -0.4862638

118.4901 -2.169951 -0.4560404

118.4845 -2.245514 -0.4241187

118.4781 -2.325196 -0.3903012

118.4715 -2.40926 -0.3545677

118.4645 -2.497896 -0.3166979

118.4569 -2.591397 -0.2766623

118.4486 -2.690003 -0.234216

118.4404 -2.794047 -0.1893224

118.4312 -2.903765 -0.1417416

118.4209 -3.019532 -0.09138529

118.4109 -3.141663 -0.038067531

118.3996 -3.270418 0.018493777

118.3873 -3.406255 0.078369066

118.3744 -3.54953 0.1418035

118.3608 -3.700577 0.2090842

118.3461 -3.859896 0.2803076

118.3304 -4.027882 0.355765

118.3136 -4.204998 0.435723

118.2954 -4.391623 0.5205567

118.2761 -4.588356 0.610373

118.2556 -4.795692 0.7055203

118.2331 -5.014112 0.8063074

118.2091 -5.244201 0.9130746

118.1831 -5.486511 1.026169

118.1553 -5.74164 1.145964

118.1257 -6.010158 1.272912

118.0937 -6.292742 1.407284

118.0592 -6.59003 1.549506

118.022 -6.902682 1.700013

117.9826 -7.231481 1.85917

117.9393 -7.576975 2.027622

117.8927 -7.939914 2.205753

117.8426 -8.321063 2.394068

117.7884 -8.721136 2.593078

117.73 -9.140972 2.803314

117.6677 -9.581278 3.025317

117.6003 -10.0429 3.259552

117.5275 -10.52639 3.506783

117.4485 -11.03269 3.76749

117.3636 -11.56254 4.042316

117.2725 -12.11667 4.331752

117.1741 -12.69573 4.63656

117.0681 -13.30058 4.95723

116.9535 -13.93173 5.294419

116.8303 -14.58995 5.648869

116.698 -15.27598 6.02093

116.5547 -15.98978 6.411726

116.4009 -16.73225 6.821581

116.2352 -17.50395 7.25069

116.057 -18.30543 7.699272

115.8658 -19.13725 8.167581

115.6612 -19.99969 8.656049

115.4414 -20.89287 9.164885

115.206 -21.8168 9.694383

114.9537 -22.77158 10.24467

114.6849 -23.757 10.81584

114.3974 -24.77288 11.40802

114.0909 -25.8188 12.0211

113.765 -26.89426 12.65495

113.4179 -27.99865 13.30936

113.0491 -29.13085 13.98399

112.658 -30.29018 14.67842

112.2443 -31.4753 15.39223

111.8067 -32.68527 16.12474

111.3445 -33.91819 16.87534

110.8582 -35.17264 17.64305

110.3478 -36.44761 18.42696

109.8107 -37.73972 19.22644

109.2477 -39.04752 20.04004

108.659 -40.36907 20.86683

108.045 -41.70193 21.70541

107.4054 -43.04391 22.55451

106.7412 -44.3921 23.4128

106.0532 -45.74464 24.27889

105.3412 -47.09839 25.15121

104.6068 -48.45078 26.02843

103.8509 -49.79956 26.90878

103.0745 -51.14162 27.79095

102.2792 -52.47483 28.67328

101.4659 -53.7964 29.55421

100.6359 -55.10347 30.43226

99.78974 -56.39305 31.30602

98.92931 -57.66276 32.17385

98.06074 -58.91293 33.03507

97.18874 -60.14347 33.88838

96.31072 -61.34959 34.73309

95.43064 -62.53017 35.569

94.54849 -63.68204 36.39567

93.66357 -64.80016 37.2144

92.7807 -65.88585 38.02324

91.90253 -66.93958 38.82066

91.02981 -67.95912 39.60646

90.16576 -68.94466 40.37851

89.31218 -69.89748 41.13654

88.46957 -70.81555 41.87962

87.63992 -71.69889 42.60717

86.82533 -72.54879 43.31825

86.02614 -73.36457 44.01255

85.24464 -74.1476 44.68899

84.48032 -74.89777 45.34778

83.73497 -75.61565 45.98871

83.00896 -76.30224 46.61069

82.30272 -76.95817 47.21407

81.61727 -77.58366 47.79895

80.95294 -78.1807 48.36446

80.3096 -78.74963 48.91158

79.68761 -79.29159 49.43948

79.0867 -79.80659 49.94901

78.50727 -80.29699 50.44009

77.94882 -80.76234 50.91273

77.41196 -81.20483 51.36746

76.89533 -81.62455 51.80453

76.39917 -82.02309 52.22443

75.92334 -82.40104 52.62703

75.46715 -82.75922 53.01334

75.03038 -83.09835 53.38348

74.61221 -83.4198 53.73788

74.21255 -83.72421 54.07678

73.8305 -84.01258 54.40101

73.46587 -84.28515 54.71082

73.11742 -84.5435 55.00702

72.78555 -84.78738 55.28961

72.46925 -85.01839 55.55906

72.16799 -85.23663 55.81642

71.88084 -85.44287 56.06155

71.60775 -85.63808 56.2952

71.34824 -85.82251 56.51761

71.10123 -85.99641 56.72949

70.86679 -86.161 56.93111

70.64397 -86.31673 57.12297

70.43225 -86.46354 57.30535

70.23122 -86.60239 57.47896

70.04049 -86.73381 57.64385

69.85954 -86.85766 57.80041

69.68795 -86.97456 57.94947

69.52494 -87.08534 58.0906

69.37052 -87.18943 58.22515

69.22437 -87.28815 58.35247

69.08557 -87.3811 58.47366

68.9539 -87.46922 58.58859

68.82945 -87.55258 58.69753

68.71135 -87.63086 58.8012

68.5994 -87.70497 58.89915

68.49377 -87.77496 58.9924

68.39315 -87.84107 59.08079

68.29836 -87.90388 59.16447

68.20814 -87.96304 59.24393

68.12315 -88.01868 59.31926

68.04227 -88.07174 59.39088

67.96577 -88.12153 59.45869

67.89339 -88.16898 59.52291

67.825 -88.21344 59.58401

67.76033 -88.25543 59.64217

67.69876 -88.29548 59.69689

67.64074 -88.33275 59.749

67.58589 -88.36837 59.79864

67.5337 -88.40168 59.8457

67.48447 -88.43377 59.89055

67.4376 -88.46366 59.93286

67.39326 -88.4927 59.97276

67.35113 -88.51952 60.01098

67.31139 -88.5451 60.04718

67.27395 -88.5694 60.0815

67.23824 -88.59248 60.11398

67.20419 -88.6144 60.14497

67.1721 -88.63527 60.17409

67.14147 -88.65524 60.20186

67.11364 -88.67139 60.23136

67.0856 -88.69008 60.25561

67.05874 -88.7082 60.2783

67.03328 -88.7254 60.29992

67.00931 -88.74199 60.32001

66.98578 -88.75803 60.33864

66.96353 -88.77294 60.35587

66.94211 -88.7878 60.37179

66.92194 -88.80217 60.38645

66.90208 -88.81608 60.39994

66.88292 -88.82895 60.41236

66.86491 -88.84184 60.42352

66.8471 -88.85431 60.43377

66.83034 -88.86625 60.44293

66.81375 -88.87781 60.45151

66.79819 -88.88898 60.45916

66.7832 -88.89978 60.46611

66.76874 -88.91024 60.47223

66.75431 -88.92021 60.47805

66.74085 -88.92999 60.48309

66.72783 -88.93935 60.48769

66.71524 -88.94839 60.49162

66.70309 -88.95715 60.49541

66.69135 -88.96564 60.49861

66.67999 -88.97385 60.50149

66.66899 -88.98228 60.50431

66.65835 -88.99001 60.50639

66.64803 -88.99749 60.50846

66.63799 -89.00464 60.51032

66.62827 -89.01158 60.51198

66.61884 -89.01843 60.51323

pressure

SECTIONAL

8

# section 1

XYZ

240

49.35203 0.8562099 0.4036607

49.35206 0.8482367 0.4040463

49.35232 0.8400534 0.4049502

49.35233 0.831671 0.4064146

49.35245 0.8231755 0.4085935

49.35295 0.8146009 0.4115928

49.35393 0.8061264 0.4157245

49.35485 0.7973746 0.4200328

49.35659 0.7885924 0.4250123

49.35864 0.7795075 0.4302069

49.36075 0.7699938 0.4355736

49.36346 0.7602729 0.4412359

49.36665 0.7501671 0.4471236

49.36982 0.7396501 0.4532549

49.37344 0.7286926 0.4596446

49.37688 0.7171916 0.4663486

49.3811 0.7052895 0.4732979

49.38569 0.6928499 0.4805652

49.39046 0.6798352 0.4881738

49.39518 0.6662123 0.4961412

49.40014 0.6519491 0.5044803

49.40574 0.6370065 0.5132427

49.41136 0.6213415 0.5224309

49.41718 0.6049153 0.5320777

49.42307 0.5876729 0.5421923

49.42942 0.5695899 0.5528491

49.43653 0.5506009 0.5640522

49.44345 0.5306544 0.5758332

49.45095 0.5096847 0.588215

49.45878 0.4876545 0.6012765

49.46716 0.4644881 0.6150329

49.4757 0.4401076 0.6294956

49.48488 0.4144711 0.6447807

49.49446 0.3874874 0.6608922

49.50472 0.3590655 0.6778547

49.51522 0.3291584 0.6957942

49.52665 0.2976568 0.7147199

49.53839 0.26445 0.7346694

49.55088 0.2294925 0.7557849

49.56396 0.1926427 0.7780778

49.57747 0.1537891 0.8016034

49.59225 0.112846 0.8265092

49.6075 0.069655746 0.85279

49.62368 0.024139913 0.8806236

49.64064 -0.023892945 0.9100127

49.65861 -0.074513957 0.9411469

49.67742 -0.1279267 0.9740623

49.69759 -0.1842596 1.008887

49.71821 -0.2437038 1.045706

49.74023 -0.3063895 1.084747

49.76378 -0.3725405 1.126001

49.78834 -0.4423128 1.169721

49.81404 -0.5159351 1.215955

49.84136 -0.5935904 1.264945

49.8697 -0.6755126 1.316777

49.89979 -0.761961 1.371648

49.93143 -0.8531232 1.429776

49.96475 -0.9493073 1.491281

49.99976 -1.05074 1.556401

50.03677 -1.157733 1.625333

50.07533 -1.270544 1.698369

50.11604 -1.389495 1.77562

50.15869 -1.514894 1.857384

50.20359 -1.647111 1.943922

50.25056 -1.78651 2.035498

50.29964 -1.93338 2.132349

50.35142 -2.08812 2.234843

50.40516 -2.251133 2.343261

50.46168 -2.422804 2.457839

50.52058 -2.603611 2.578988

50.58253 -2.793966 2.707033

50.64694 -2.994335 2.842305

50.71432 -3.205177 2.985135

50.78413 -3.426939 3.135993

50.85713 -3.660156 3.295212

50.9326 -3.905309 3.463233

51.0113 -4.162979 3.640376

51.09273 -4.433658 3.827144

51.17742 -4.717891 4.023899

51.26477 -5.016205 4.231189

51.35514 -5.32919 4.449318

51.44796 -5.657361 4.678823

51.54353 -6.00136 4.920152

51.64209 -6.361681 5.173745

51.7427 -6.738933 5.440033

51.84603 -7.133702 5.719444

51.95171 -7.546399 6.012489

52.05897 -7.977521 6.319789

52.16813 -8.427225 6.642308

52.27954 -8.89597 6.980131

52.39185 -9.384159 7.334146

52.50588 -9.891845 7.704731

52.62088 -10.41956 8.092438

52.73647 -10.96738 8.497705

52.85272 -11.53527 8.921187

52.96885 -12.1235 9.363195

53.08491 -12.73195 9.824354

53.2002 -13.36057 10.3049

53.31429 -14.00902 10.80534

53.42701 -14.67698 11.32599

53.5382 -15.3641 11.86725

53.64676 -16.06985 12.42929

53.75296 -16.79359 13.01231

53.85669 -17.53466 13.61652

53.95681 -18.29206 14.24199

54.05328 -19.0648 14.88858

54.14627 -19.85188 15.55648

54.23531 -20.65229 16.24538

54.32019 -21.46443 16.95472

54.40075 -22.28723 17.68462

54.47644 -23.11897 18.43424

54.54899 -23.95888 19.20243

54.61593 -24.80422 19.99016

54.67842 -25.65392 20.79571

54.73692 -26.50625 21.61785

54.7909 -27.35979 22.45599

54.84155 -28.21272 23.3085

54.88802 -29.06344 24.1743

54.93157 -29.91051 25.05214

54.97156 -30.75201 25.94042

55.00904 -31.5863 26.83766

55.04356 -32.41238 27.74199

55.07589 -33.22823 28.65281

55.10573 -34.03203 29.56805

55.13363 -34.82539 30.48374

55.15996 -35.6076 31.39685

55.18409 -36.37816 32.30584

55.20527 -37.13345 33.2109

55.22277 -37.87467 34.10818

55.23787 -38.60173 34.99482

55.25088 -39.31432 35.87014

55.2622 -40.01039 36.73336

55.27206 -40.68999 37.58325

55.28053 -41.35165 38.41908

55.28892 -41.99499 39.23931

55.29652 -42.62046 40.04371

55.3041 -43.22567 40.83162

55.31166 -43.81225 41.6021

55.31984 -44.37959 42.3545

55.3284 -44.92727 43.08804

55.33788 -45.45525 43.80292

55.34834 -45.96371 44.4978

55.35931 -46.45285 45.17315

55.37168 -46.92297 45.82836

55.38525 -47.37366 46.46368

55.39986 -47.80583 47.07878

55.41565 -48.22018 47.67371

55.43263 -48.61591 48.24861

55.45069 -48.99433 48.80337

55.46976 -49.35566 49.33849

55.48998 -49.70038 49.8541

55.51125 -50.02869 50.35001

55.53318 -50.34106 50.82759

55.5561 -50.63894 51.28615

55.57965 -50.92193 51.72647

55.60367 -51.1911 52.14897

55.62874 -51.44597 52.55389

55.65402 -51.68822 52.94175

55.67949 -51.91769 53.31349

55.70563 -52.13568 53.66906

55.73158 -52.34158 54.00889

55.75778 -52.53644 54.33366

55.78397 -52.72105 54.64384

55.81003 -52.89592 54.93996

55.83647 -53.06056 55.22252

55.86251 -53.21659 55.49248

55.88812 -53.36353 55.74918

55.91344 -53.50257 55.99427

55.93832 -53.63387 56.22756

55.96304 -53.75739 56.44965

55.98732 -53.87409 56.66099

56.01117 -53.98399 56.86237

56.03453 -54.08796 57.05377

56.05731 -54.18534 57.23553

56.07961 -54.27742 57.40854

56.10157 -54.3641 57.57293

56.1225 -54.4459 57.7294

56.1429 -54.52293 57.87768

56.16285 -54.59496 58.01858

56.18308 -54.66288 58.15273

56.20404 -54.72512 58.28038

56.2266 -54.78184 58.40269

56.25508 -54.82935 58.51999

56.30354 -54.85545 58.63657

56.36079 -54.86953 58.74688

56.42463 -54.87317 58.84995

56.49103 -54.86977 58.94466

56.55867 -54.86084 59.02894

56.62363 -54.85003 59.10621

56.68676 -54.83717 59.17526

56.74683 -54.82291 59.23826

56.80479 -54.80763 59.29452

56.8595 -54.79224 59.34691

56.9122 -54.77552 59.39358

56.96207 -54.75913 59.43725

57.00918 -54.74179 59.4765

57.05341 -54.72642 59.51361

57.09725 -54.7075 59.54543

57.13781 -54.68954 59.57494

57.17553 -54.67427 59.6044

57.2131 -54.65555 59.62788

57.24761 -54.63799 59.65003

57.28097 -54.62101 59.67058

57.3121 -54.60471 59.69017

57.3419 -54.58789 59.70702

57.37003 -54.57127 59.72226

57.39634 -54.55554 59.73629

57.42218 -54.54382 59.75507

57.44617 -54.52774 59.765

57.46867 -54.51201 59.77407

57.49025 -54.49656 59.78238

57.51049 -54.48189 59.79024

57.52994 -54.46757 59.79681

57.54837 -54.45397 59.8033

57.56565 -54.4406 59.80862

57.58208 -54.42781 59.81352

57.59788 -54.41569 59.81783

57.61267 -54.40381 59.82185

57.62696 -54.3919 59.82539

57.64031 -54.38092 59.82847

57.65302 -54.37036 59.83114

57.66509 -54.35992 59.83345

57.67682 -54.35015 59.83543

57.68777 -54.3405 59.83709

57.69842 -54.3312 59.83872

57.70813 -54.32252 59.84008

57.71806 -54.31388 59.84121

57.7271 -54.30537 59.84215

57.73573 -54.29759 59.84266

57.74421 -54.28966 59.84302

57.75208 -54.28219 59.84367

57.75986 -54.27504 59.84394

57.76731 -54.26791 59.84409

57.77422 -54.26118 59.84435

57.78106 -54.25468 59.84404

57.78765 -54.24819 59.8441

57.79374 -54.24237 59.84384

57.79984 -54.23652 59.8435

57.80547 -54.23082 59.8431

57.81113 -54.22507 59.84286

# section 2

XYZ

240

56.39392 0.2174792 0.091503277

56.39394 0.2092122 0.092101559

56.39396 0.2007425 0.093246348

56.39396 0.1920866 0.094990626

56.39405 0.1833229 0.09747076

56.39433 0.1744772 0.1007891

56.39502 0.1657184 0.1052195

56.3959 0.1566602 0.1098392

56.39738 0.1475315 0.1151088

56.39914 0.1380864 0.1206105

56.40073 0.1282019 0.1262932

56.40314 0.118069 0.1322944

56.40578 0.1075296 0.1385388

56.40863 0.096555918 0.1450427

56.4117 0.08511886 0.1518241

56.41459 0.073127888 0.1589293

56.41822 0.060694236 0.1663112

56.42201 0.047695573 0.1740317

56.42598 0.034098238 0.1821114

56.43012 0.019867007 0.1905719

56.43447 0.0049633654 0.1994287

56.43903 -0.010649022 0.2087267

56.44378 -0.02701381 0.2184794

56.44877 -0.044176556 0.2287138

56.45402 -0.062189512 0.239448

56.45953 -0.081088021 0.2507429

56.46529 -0.1009335 0.2626134

56.47135 -0.1217831 0.2750935

56.47773 -0.1437004 0.2882085

56.48443 -0.1667331 0.3020312

56.49144 -0.1909575 0.3165815

56.49886 -0.2164505 0.331885

56.50663 -0.2432655 0.3480367

56.51479 -0.2714937 0.3650558

56.52341 -0.3012264 0.3829742

56.53246 -0.3325253 0.4019022

56.54198 -0.3654982 0.421864

56.55202 -0.4002521 0.4429031

56.56259 -0.4368621 0.46514

56.57371 -0.4754553 0.4886092

56.58545 -0.5161507 0.5133726

56.59777 -0.559051 0.5395522

56.61078 -0.6043052 0.5671791

56.62445 -0.6520213 0.5964026

56.63888 -0.7023684 0.6272493

56.65406 -0.7554634 0.6598917

56.67005 -0.8114876 0.6943817

56.68689 -0.8705999 0.7308388

56.70465 -0.932981 0.7693704

56.72331 -0.9987898 0.8101583

56.74298 -1.06825 0.853254

56.76365 -1.141537 0.8988678

56.78543 -1.218888 0.9470811

56.80831 -1.300504 0.9981021

56.83239 -1.38664 1.052051

56.85773 -1.477535 1.109109

56.88433 -1.573437 1.169492

56.91231 -1.674633 1.23334

56.94174 -1.781401 1.300867

56.97262 -1.894039 1.372283

57.00501 -2.012843 1.447849

57.03901 -2.138162 1.527732

57.07466 -2.270328 1.612198

57.11202 -2.409698 1.701501

57.15115 -2.556644 1.795906

57.19209 -2.711546 1.89569

57.23494 -2.874803 2.001145

57.27967 -3.046828 2.112605

57.32642 -3.228066 2.23031

57.37519 -3.418965 2.354627

57.42601 -3.619992 2.485893

57.47892 -3.831627 2.624457

57.53403 -4.054368 2.770647

57.59122 -4.288709 2.924916

57.65052 -4.535184 3.087614

57.71197 -4.794332 3.259138

57.77556 -5.066701 3.439896

57.84127 -5.352849 3.630303

57.90917 -5.653352 3.830754

57.97892 -5.968779 4.04179

58.05057 -6.299712 4.263793

58.12407 -6.646738 4.497212

58.19942 -7.010438 4.742471

58.2762 -7.391398 5.000124

58.35437 -7.790199 5.270575

58.4339 -8.207402 5.554255

58.51444 -8.643539 5.851678

58.59563 -9.099018 6.163517

58.67714 -9.574128 6.490557

58.75946 -10.06932 6.833063

58.84174 -10.58489 7.191804

58.92387 -11.12118 7.567217

59.00556 -11.67843 7.959821

59.08641 -12.25686 8.370113

59.16605 -12.85657 8.798573

59.24407 -13.4776 9.245686

59.32011 -14.11993 9.711899

59.3937 -14.78341 10.19762

59.46439 -15.46783 10.70323

59.53176 -16.17287 11.22907

59.59541 -16.89805 11.77544

59.65492 -17.64285 12.34259

59.70989 -18.40661 12.93071

59.75992 -19.18856 13.53989

59.8046 -19.98782 14.1702

59.84363 -20.80337 14.8216

59.87673 -21.63411 15.49399

59.90365 -22.47878 16.18717

59.92418 -23.33612 16.90081

59.93816 -24.20471 17.63451

59.94547 -25.08304 18.38775

59.94674 -25.9701 19.15929

59.94054 -26.86302 19.94984

59.92773 -27.76075 20.75779

59.90846 -28.66162 21.58216

59.88288 -29.56387 22.42187

59.8513 -30.46578 23.27575

59.81402 -31.36563 24.14252

59.7714 -32.26171 25.02078

59.72373 -33.15232 25.90907

59.67139 -34.03582 26.8059

59.61492 -34.91064 27.70963

59.55433 -35.77468 28.61919

59.48983 -36.62657 29.53277

59.42253 -37.46699 30.44678

59.35318 -38.29593 31.35835

59.28154 -39.11162 32.26631

59.20647 -39.91054 33.17109

59.12902 -40.69317 34.06956

59.04979 -41.4591 34.9598

58.96958 -42.20785 35.84017

58.88854 -42.93777 36.71008

58.80743 -43.64904 37.56755

58.72656 -44.34039 38.41206

58.64656 -45.01196 39.24202

58.56765 -45.66325 40.05651

58.49014 -46.29355 40.85503

58.41453 -46.90335 41.63621

58.34099 -47.49226 42.39956

58.26977 -48.06015 43.14455

58.20115 -48.60741 43.87042

58.13525 -49.13408 44.57675

58.07225 -49.64029 45.26329

58.01212 -50.12638 45.92968

57.95516 -50.59244 46.57592

57.90121 -51.03913 47.20165

57.85038 -51.46674 47.80692

57.80268 -51.87556 48.39189

57.75805 -52.26632 48.95644

57.71638 -52.63942 49.50082

57.67781 -52.99511 50.02539

57.64198 -53.33424 50.5302

57.60903 -53.65718 51.01569

57.57876 -53.96459 51.4821

57.55107 -54.25684 51.92998

57.5258 -54.53473 52.3595

57.50303 -54.79849 52.77139

57.48239 -55.04886 53.16592

57.46386 -55.28638 53.54358

57.44724 -55.5117 53.90478

57.43254 -55.7251 54.25019

57.41959 -55.92723 54.58025

57.40825 -56.11858 54.89545

57.39842 -56.29965 55.1963

57.38993 -56.47092 55.48331

57.3827 -56.63286 55.75698

57.37668 -56.78593 56.01782

57.37173 -56.93055 56.26631

57.36773 -57.06717 56.50296

57.36473 -57.19601 56.72838

57.36242 -57.31775 56.94278

57.36083 -57.43267 57.14673

57.35987 -57.54114 57.34067

57.35967 -57.64326 57.52517

57.35985 -57.73974 57.70042

57.36058 -57.8306 57.86703

57.36163 -57.91639 58.02525

57.36298 -57.9973 58.17547

57.36496 -58.07327 58.31829

57.36736 -58.1448 58.45389

57.37151 -58.21094 58.58316

57.37776 -58.27167 58.70639

57.38894 -58.3247 58.82475

57.41691 -58.35974 58.94107

57.45264 -58.3842 59.05166

57.49495 -58.39899 59.15585

57.54114 -58.40649 59.25306

57.5909 -58.40656 59.34208

57.64016 -58.40382 59.42466

57.69017 -58.39663 59.49994

57.73901 -58.38764 59.56963

57.78749 -58.37571 59.6331

57.83432 -58.3629 59.69197

57.88036 -58.34785 59.74532

57.92435 -58.33285 59.79515

57.96748 -58.31581 59.83981

58.00787 -58.30013 59.88242

58.04831 -58.28151 59.91936

58.08661 -58.26325 59.95362

58.12241 -58.24663 59.98675

58.15799 -58.22765 60.01471

58.19161 -58.20922 60.04072

58.22366 -58.19114 60.06462

58.25393 -58.17429 60.08755

58.2832 -58.15635 60.10695

58.31105 -58.13885 60.12471

58.33757 -58.12185 60.141

58.3621 -58.10972 60.16233

58.38636 -58.09257 60.17445

58.40937 -58.076 60.18544

58.43124 -58.05998 60.19542

58.45201 -58.04452 60.20447

58.47176 -58.02958 60.21266

58.49051 -58.01519 60.22006

58.50834 -58.00129 60.22675

58.5253 -57.98789 60.23276

58.54141 -57.97498 60.23817

58.55676 -57.96255 60.24306

58.57136 -57.95058 60.24746

58.58526 -57.93905 60.25138

58.5985 -57.92793 60.25489

58.61113 -57.91723 60.25805

58.62317 -57.90691 60.26084

58.63465 -57.89698 60.26332

58.64563 -57.88741 60.26555

58.6561 -57.87818 60.26749

58.66611 -57.86928 60.2692

58.67569 -57.86071 60.27071

58.68485 -57.85244 60.27203

58.69363 -57.84444 60.27317

58.70204 -57.83673 60.27416

58.71011 -57.82927 60.27499

58.71786 -57.82207 60.2757

58.7253 -57.81511 60.27628

58.73244 -57.80837 60.27676

58.73932 -57.80184 60.27714

58.74594 -57.79553 60.27742

58.75232 -57.78939 60.27763

58.75848 -57.78345 60.27777

58.76442 -57.77769 60.27784

# section 3

XYZ

240

65.92666 -0.6472106 -0.3310836

65.9266 -0.6558762 -0.330199

65.92651 -0.6647321 -0.3287255

65.92641 -0.6737603 -0.3266036

65.92639 -0.6828889 -0.3237149

65.92651 -0.692098 -0.3199652

65.92697 -0.701246 -0.3151312

65.92757 -0.7107156 -0.3100892

65.92867 -0.720308 -0.3044254

65.92997 -0.7302452 -0.2985097

65.93114 -0.7406315 -0.2923991

65.93297 -0.7513215 -0.2859394

65.93498 -0.762449 -0.2792135

65.93715 -0.774041 -0.2722041

65.93949 -0.7861274 -0.2648924

65.94169 -0.7987799 -0.2572437

65.94448 -0.8119361 -0.2492759

65.94739 -0.8256897 -0.2409435

65.95042 -0.8400757 -0.2322247

65.9536 -0.8551319 -0.2230961

65.95692 -0.8709014 -0.2135394

65.96041 -0.8874184 -0.2035136

65.96405 -0.9047328 -0.1930006

65.96786 -0.9228915 -0.181971

65.97189 -0.9419498 -0.1703997

65.9761 -0.961951 -0.1582401

65.98051 -0.9829571 -0.1454658

65.98514 -1.005028 -0.1320401

65.99002 -1.028228 -0.1179291

65.99513 -1.052619 -0.1030773

66.00049 -1.078274 -0.087449878

66.00615 -1.105272 -0.071009152

66.01208 -1.133683 -0.053684533

66.0183 -1.163597 -0.035437685

66.02486 -1.195103 -0.016222939

66.03175 -1.228286 0.0040422077

66.03899 -1.263251 0.025403092

66.04664 -1.300103 0.04791747

66.05466 -1.338946 0.071675695

66.06311 -1.379901 0.096736304

66.07203 -1.42309 0.1231716

66.08138 -1.468639 0.1510808

66.09124 -1.51669 0.1805278

66.1016 -1.567379 0.2116306

66.11252 -1.620867 0.2444549

66.12398 -1.677305 0.2791336

66.13604 -1.736864 0.3157573

66.14874 -1.799736 0.3544235

66.16212 -1.866094 0.3952668

66.17613 -1.936134 0.4384324

66.19093 -2.010074 0.4840181

66.20643 -2.088122 0.5321973

66.22276 -2.170518 0.5830866

66.23988 -2.257498 0.6368639

66.25788 -2.34932 0.693675

66.27679 -2.446249 0.7536964

66.29658 -2.548562 0.8171265

66.31734 -2.656553 0.8841336

66.33914 -2.77053 0.9549231

66.36197 -2.890817 1.029703

66.38583 -3.017749 1.108709

66.41085 -3.151683 1.192145

66.43703 -3.292986 1.280262

66.46435 -3.44204 1.373315

66.49285 -3.599246 1.471567

66.52258 -3.765019 1.575294

66.55356 -3.939794 1.684781

66.58577 -4.124025 1.800345

66.61931 -4.318178 1.92226

66.65414 -4.522739 2.050872

66.69024 -4.73821 2.186517

66.72757 -4.965104 2.329542

66.76624 -5.203957 2.48029

66.80608 -5.455312 2.639177

66.84711 -5.719738 2.806569

66.8893 -5.997808 2.982863

66.93253 -6.290101 3.16847

66.97678 -6.597214 3.363808

67.02207 -6.919759 3.569283

67.06802 -7.258343 3.785407

67.11465 -7.613578 4.012588

67.16182 -7.986084 4.251283

67.20947 -8.376472 4.501933

67.2571 -8.785338 4.765081

67.30463 -9.213291 5.041162

67.35198 -9.660913 5.330629

67.39871 -10.12875 5.634002

67.44442 -10.61723 5.951924

67.48865 -11.12672 6.285132

67.53182 -11.65769 6.63394

67.57302 -12.21045 6.999098

67.61211 -12.78534 7.381037

67.64868 -13.38265 7.780264

67.68233 -14.00257 8.197274

67.71257 -14.64524 8.63254

67.73892 -15.31067 9.086531

67.76093 -15.99884 9.559681

67.77805 -16.70959 10.05238

67.78981 -17.44271 10.56499

67.79575 -18.19785 11.09783

67.79535 -18.97453 11.65119

67.78812 -19.77218 12.22526

67.7736 -20.59011 12.82022

67.75131 -21.42752 13.43614

67.72085 -22.28345 14.07303

67.68183 -23.15689 14.73083

67.63394 -24.04664 15.40938

67.57688 -24.95144 16.10845

67.51043 -25.86991 16.82767

67.43439 -26.80056 17.56661

67.34868 -27.74184 18.3247

67.254 -28.69269 19.1007

67.14866 -29.65005 19.89518

67.03373 -30.61285 20.70654

66.90936 -31.57931 21.53379

66.77576 -32.54757 22.37583

66.63333 -33.5158 23.23146

66.48235 -34.48212 24.09939

66.32328 -35.44467 24.97828

66.15664 -36.40168 25.86667

65.98306 -37.35147 26.76301

65.80312 -38.29235 27.66562

65.61684 -39.22198 28.57347

65.42464 -40.13868 29.48496

65.22847 -41.04306 30.39674

65.02971 -41.93499 31.30619

64.82832 -42.81222 32.21245

64.62321 -43.67006 33.11691

64.41682 -44.50864 34.01735

64.20999 -45.32697 34.9123

64.00349 -46.12487 35.79951

63.79759 -46.90062 36.67831

63.59341 -47.65498 37.54617

63.39124 -48.38662 38.40245

63.19196 -49.0961 39.24516

62.99581 -49.78278 40.0734

62.8032 -50.44648 40.88612

62.61477 -51.08755 41.68209

62.43075 -51.70587 42.46054

62.25142 -52.3014 43.2208

62.07717 -52.87469 43.96203

61.90815 -53.42584 44.68371

61.74455 -53.95517 45.38543

61.58642 -54.46306 46.06681

61.43401 -54.9497 46.72776

61.28727 -55.4159 47.36786

61.14629 -55.86202 47.98711

61.01103 -56.28839 48.58564

60.88152 -56.69581 49.16333

60.75762 -57.08475 49.7204

60.63935 -57.45556 50.25715

60.5265 -57.80914 50.77364

60.41904 -58.14583 51.27034

60.31684 -58.46643 51.74744

60.21972 -58.77129 52.20551

60.12751 -59.06123 52.64478

60.04018 -59.33665 53.06585

59.95739 -59.59819 53.46912

59.87907 -59.84644 53.85508

59.80499 -60.08207 54.22415

59.73505 -60.30538 54.577

59.66903 -60.51707 54.91406

59.60675 -60.71761 55.23586

59.54806 -60.90755 55.54294

59.49276 -61.08736 55.83582

59.44069 -61.25754 56.11501

59.39172 -61.41856 56.38106

59.34566 -61.57086 56.63444

59.30236 -61.71487 56.87566

59.26174 -61.85085 57.10536

59.22353 -61.97947 57.32379

59.18765 -62.10101 57.53153

59.15396 -62.21584 57.72903

59.12246 -62.32412 57.91685

59.09284 -62.42651 58.09523

59.06509 -62.52308 58.26474

59.03905 -62.61435 58.42569

59.0146 -62.70053 58.57848

58.9919 -62.78163 58.72369

58.97073 -62.85818 58.86147

58.95193 -62.9296 58.99266

58.93566 -62.99602 59.11749

58.92372 -63.05607 59.23695

58.92375 -63.10337 59.35311

58.93049 -63.14192 59.46407

58.94374 -63.17176 59.56984

58.96232 -63.1939 59.6703

58.98806 -63.2064 59.76559

59.01595 -63.21442 59.85534

59.04844 -63.21531 59.93946

59.08179 -63.2131 60.01807

59.11779 -63.2058 60.0909

59.15355 -63.19681 60.15874

59.19092 -63.18384 60.22093

59.22701 -63.17063 60.2791

59.26428 -63.154 60.33163

59.30006 -63.13787 60.38112

59.33559 -63.11964 60.42547

59.37065 -63.10061 60.46603

59.40408 -63.08265 60.50443

59.43681 -63.06324 60.53845

59.46889 -63.04357 60.5693

59.4997 -63.0242 60.59768

59.52864 -63.00625 60.62496

59.55741 -62.98696 60.64806

59.58493 -62.96816 60.66927

59.61126 -62.94991 60.68873

59.63452 -62.93663 60.7137

59.65908 -62.91833 60.72845

59.6825 -62.90067 60.74184

59.70483 -62.8836 60.75399

59.72612 -62.86715 60.76503

59.74643 -62.85128 60.77505

59.76577 -62.83601 60.78416

59.78422 -62.82127 60.79243

59.8018 -62.8071 60.79994

59.81857 -62.79344 60.80676

59.83455 -62.78032 60.81297

59.8498 -62.7677 60.81863

59.86435 -62.75554 60.82374

59.87824 -62.74384 60.8284

59.8915 -62.7326 60.83264

59.90417 -62.72176 60.83648

59.91628 -62.71134 60.83997

59.92786 -62.70132 60.84316

59.93893 -62.69164 60.84603

59.94954 -62.68234 60.84864

59.95969 -62.67337 60.85101

59.96942 -62.66474 60.85317

59.97875 -62.65639 60.85512

59.98771 -62.64835 60.85689

59.9963 -62.64057 60.85848

60.00457 -62.63308 60.85994

60.01251 -62.62582 60.86123

60.02016 -62.61881 60.86241

60.02752 -62.61202 60.86346

60.03461 -62.60546 60.86441

60.04146 -62.59909 60.86525

60.04807 -62.59293 60.86602

60.05446 -62.58694 60.8667

# section 4

XYZ

240

77.6241 -1.708256 -0.8496326

77.62395 -1.717411 -0.8483967

77.62374 -1.726742 -0.84652

77.62351 -1.736226 -0.8439345

77.62335 -1.745802 -0.8405444

77.62328 -1.755458 -0.8362657

77.62346 -1.765084 -0.8309367

77.62372 -1.775058 -0.8253765

77.62434 -1.785219 -0.8192288

77.62508 -1.79576 -0.8128048

77.62573 -1.806761 -0.8061689

77.62684 -1.818136 -0.7991471

77.62807 -1.829984 -0.7918299

77.62942 -1.842335 -0.7842001

77.63086 -1.855219 -0.7762384

77.63222 -1.868683 -0.7679224

77.63396 -1.882726 -0.7592359

77.63579 -1.897406 -0.7501526

77.63769 -1.912759 -0.7406494

77.63968 -1.928828 -0.7307011

77.64175 -1.94566 -0.7202855

77.64393 -1.963287 -0.7093666

77.6462 -1.981767 -0.6979206

77.64857 -2.001147 -0.6859152

77.65109 -2.021489 -0.6733168

77.65372 -2.042843 -0.6600963

77.65646 -2.065273 -0.6462126

77.65933 -2.088842 -0.6316267

77.66238 -2.113617 -0.6162937

77.66554 -2.139674 -0.6001788

77.66886 -2.167086 -0.58323

77.67237 -2.19593 -0.5653936

77.67602 -2.2263 -0.5466298

77.67986 -2.258281 -0.5268764

77.68391 -2.291964 -0.5060709

77.68816 -2.327459 -0.4841653

77.6926 -2.364867 -0.4610873

77.6973 -2.404295 -0.4367627

77.70222 -2.445878 -0.4111379

77.70737 -2.489729 -0.384124

77.71284 -2.535979 -0.3556378

77.71854 -2.584778 -0.3256058

77.72456 -2.636262 -0.2939255

77.73083 -2.690599 -0.2605166

77.73744 -2.747942 -0.2252657

77.74435 -2.808481 -0.1880883

77.7516 -2.872378 -0.1488464

77.75921 -2.939862 -0.1074694

77.7672 -3.0111 -0.063789487

77.77553 -3.086333 -0.017706359

77.78433 -3.16577 0.030934811

77.7935 -3.249661 0.082261853

77.80315 -3.338247 0.1364348

77.81319 -3.431807 0.1935946

77.82372 -3.530608 0.2539178

77.83472 -3.634941 0.3175756

77.84616 -3.745121 0.3847444

77.85809 -3.86145 0.455628

77.87051 -3.984272 0.530421

77.88345 -4.113946 0.6093275

77.89688 -4.250851 0.6925567

77.91087 -4.395356 0.780352

77.92542 -4.547872 0.8729483

77.94041 -4.708808 0.9706028

77.95589 -4.878603 1.073577

77.97184 -5.057718 1.18214

77.98826 -5.246625 1.296577

78.00511 -5.445835 1.417176

78.02245 -5.655835 1.544257

78.04018 -5.877162 1.678138

78.0582 -6.110355 1.819156

78.0764 -6.355971 1.967657

78.09492 -6.614599 2.123997

78.11346 -6.886833 2.28855

78.13206 -7.173283 2.461702

78.15064 -7.474572 2.64385

78.16889 -7.791313 2.835408

78.18679 -8.124152 3.036795

78.20433 -8.473745 3.248436

78.2211 -8.840744 3.470802

78.237 -9.225799 3.704337

78.25186 -9.629574 3.949508

78.26554 -10.05271 4.206771

78.2774 -10.49582 4.476664

78.28733 -10.95954 4.759653

78.2952 -11.44449 5.056219

78.30045 -11.95121 5.366893

78.3026 -12.48021 5.692279

78.30107 -13.03187 6.033059

78.29623 -13.60676 6.389598

78.28703 -14.20514 6.762631

78.27327 -14.82741 7.152577

78.2545 -15.47386 7.559933

78.23022 -16.14471 7.985185

78.19984 -16.84008 8.428802

78.16281 -17.55999 8.891233

78.1185 -18.30441 9.372894

78.06635 -19.07318 9.874157

78.00582 -19.86606 10.39536

77.93635 -20.68267 10.9368

77.85735 -21.52254 11.49871

77.76823 -22.38504 12.08129

77.66842 -23.26945 12.68465

77.55741 -24.17489 13.30882

77.43472 -25.10038 13.9538

77.29995 -26.04485 14.61944

77.15267 -27.00703 15.30556

76.99257 -27.9856 16.01185

76.81937 -28.97907 16.73793

76.63289 -29.98589 17.48329

76.43301 -31.00441 18.24733

76.2206 -32.03352 19.0288

75.9936 -33.06995 19.8281

75.75336 -34.11261 20.64366

75.50003 -35.15956 21.47444

75.23391 -36.20882 22.31933

74.95542 -37.25841 23.17711

74.66494 -38.30629 24.04647

74.36297 -39.35042 24.92612

74.05035 -40.38889 25.81464

73.72797 -41.42004 26.71037

73.39655 -42.442 27.6116

73.05604 -43.45209 28.51738

72.70713 -44.44832 29.42627

72.35282 -45.43119 30.33532

71.99526 -46.40042 31.24217

71.63467 -47.35317 32.14635

71.27001 -48.2833 33.05041

70.90537 -49.19052 33.95328

70.54198 -50.07317 34.85401

70.1805 -50.93139 35.7496

69.82139 -51.76335 36.63932

69.46619 -52.57059 37.51992

69.11519 -53.35166 38.39065

68.76954 -54.10768 39.249

68.42951 -54.83778 40.09411

68.09567 -55.54247 40.92426

67.76881 -56.22191 41.73838

67.44921 -56.87632 42.53536

67.13722 -57.50574 43.31437

66.83335 -58.11098 44.07446

66.5378 -58.69218 44.81495

66.25075 -59.24987 45.5353

65.97237 -59.78452 46.23507

65.70282 -60.2964 46.91407

65.44225 -60.78656 47.57181

65.19064 -61.25539 48.20821

64.94794 -61.70328 48.82336

64.71426 -62.13115 49.41719

64.48946 -62.53955 49.98983

64.27341 -62.9289 50.54152

64.06603 -63.3002 51.07235

63.86714 -63.65377 51.5828

63.67667 -63.99055 52.07301

63.49435 -64.31089 52.54361

63.32001 -64.61562 52.99482

63.15346 -64.90536 53.42717

62.99442 -65.18059 53.84116

62.8427 -65.44199 54.2373

62.69813 -65.69028 54.61602

62.56039 -65.92576 54.978

62.42926 -66.14915 55.32366

62.30449 -66.36098 55.65357

62.18584 -66.56181 55.9683

62.07309 -66.75211 56.26836

61.96599 -66.9324 56.55434

61.86433 -67.10318 56.82677

61.76784 -67.26489 57.08615

61.6763 -67.41797 57.33299

61.58952 -67.56272 57.56793

61.50726 -67.69978 57.79132

61.42931 -67.82943 58.0037

61.35544 -67.95208 58.20558

61.28554 -68.06792 58.39747

61.21934 -68.17757 58.57967

61.15667 -68.28113 58.75276

61.09737 -68.37912 58.91706

61.04126 -68.47179 59.07299

60.98828 -68.55919 59.22112

60.93819 -68.6419 59.36161

60.89125 -68.71978 59.49513

60.84731 -68.79317 59.62194

60.807 -68.86183 59.74275

60.77275 -68.92419 59.8587

60.74391 -68.98003 59.97013

60.72154 -69.02833 60.07783

60.70622 -69.06846 60.18228

60.70251 -69.09618 60.28527

60.70415 -69.11741 60.3838

60.71513 -69.12821 60.47878

60.7295 -69.13432 60.56834

60.75018 -69.13271 60.65263

60.77234 -69.12841 60.7315

60.79909 -69.11799 60.80453

60.82547 -69.10698 60.87294

60.85555 -69.09086 60.93514

60.88567 -69.0742 60.99306

60.91517 -69.05643 61.0465

60.94626 -69.03645 61.0948

60.9768 -69.01685 61.13965

61.00603 -68.99691 61.1811

61.03621 -68.97569 61.2179

61.06551 -68.95476 61.25179

61.0928 -68.93544 61.2844

61.12096 -68.91451 61.31204

61.14808 -68.89413 61.33746

61.17418 -68.87432 61.36082

61.19587 -68.85963 61.39026

61.22081 -68.83992 61.40825

61.24472 -68.82092 61.42456

61.26762 -68.80257 61.43938

61.28955 -68.78491 61.45286

61.31055 -68.76791 61.46514

61.33062 -68.75155 61.47634

61.34981 -68.73579 61.48656

61.36818 -68.72066 61.4959

61.38573 -68.70608 61.50445

61.40251 -68.69211 61.51229

61.41855 -68.67868 61.51949

61.4339 -68.66577 61.52607

61.44857 -68.65335 61.53213

61.46262 -68.64143 61.5377

61.47606 -68.62997 61.54284

61.48893 -68.61895 61.54755

61.50126 -68.60837 61.55192

61.51307 -68.59815 61.55593

61.52439 -68.58833 61.55965

61.53526 -68.5789 61.56309

61.54568 -68.56981 61.56627

61.55569 -68.56103 61.56922

61.56531 -68.55259 61.57195

61.57455 -68.54443 61.57448

61.58345 -68.53657 61.57682

61.59202 -68.52896 61.57901

61.60028 -68.52161 61.58103

61.60823 -68.5145 61.58292

61.61591 -68.50764 61.58467

61.62333 -68.50098 61.58631

61.63049 -68.49453 61.58783

61.63743 -68.48827 61.58926

# section 5

XYZ

240

90.22175 -2.069101 -1.115859

90.22154 -2.078942 -1.114341

90.22131 -2.088974 -1.11215

90.22103 -2.09918 -1.109239

90.22079 -2.109526 -1.105561

90.2206 -2.120005 -1.101044

90.22055 -2.13055 -1.095605

90.22052 -2.141482 -1.089933

90.22072 -2.152681 -1.083744

90.22095 -2.164308 -1.07728

90.22112 -2.176433 -1.070595

90.22158 -2.188992 -1.063531

90.22207 -2.202076 -1.056166

90.22263 -2.215717 -1.048481

90.22322 -2.229948 -1.040459

90.22375 -2.244817 -1.032093

90.22451 -2.260335 -1.023331

90.22529 -2.276558 -1.01417

90.22609 -2.293529 -1.004585

90.22693 -2.311292 -0.9945525

90.22779 -2.329898 -0.9840494

90.22871 -2.349391 -0.9730392

90.22967 -2.369827 -0.9614977

90.23064 -2.391264 -0.9493936

90.23172 -2.413759 -0.9366901

90.2328 -2.437381 -0.9233615

90.23393 -2.462192 -0.9093642

90.23512 -2.488265 -0.8946589

90.23639 -2.51567 -0.8792003

90.23767 -2.544496 -0.862954

90.239 -2.57482 -0.8458665

90.24043 -2.606728 -0.8278846

90.24189 -2.640325 -0.8089674

90.24342 -2.675702 -0.7890519

90.24503 -2.712961 -0.7680757

90.24671 -2.752224 -0.7459896

90.24843 -2.793601 -0.7227205

90.25027 -2.837213 -0.6981951

90.25219 -2.883203 -0.6723547

90.25417 -2.931702 -0.6451132

90.25627 -2.982853 -0.6163869

90.25841 -3.036821 -0.5861001

90.26068 -3.093757 -0.5541509

90.26299 -3.153847 -0.5204571

90.26542 -3.217259 -0.4849048

90.26789 -3.284201 -0.4474044

90.27044 -3.354856 -0.4078207

90.27309 -3.429467 -0.3660801

90.27584 -3.508229 -0.3220153

90.27863 -3.5914 -0.2755221

90.28157 -3.679212 -0.2264448

90.28455 -3.77194 -0.17465

90.28767 -3.869853 -0.119981

90.29079 -3.973252 -0.062290851

90.29402 -4.082433 -0.0014036342

90.2973 -4.19772 0.062854625

90.30054 -4.319449 0.1306679

90.3038 -4.447966 0.2022379

90.30702 -4.583644 0.2777639

90.31026 -4.726871 0.357455

90.3134 -4.878062 0.4415255

90.31655 -5.037627 0.5302188

90.31964 -5.20601 0.6237783

90.3225 -5.383669 0.7224634

90.32511 -5.57108 0.8265438

90.32746 -5.768744 0.9362956

90.32948 -5.977179 1.052006

90.33112 -6.19693 1.173976

90.33241 -6.428546 1.302526

90.33316 -6.672602 1.437985

90.33323 -6.929691 1.580697

90.33244 -7.200419 1.731015

90.33086 -7.485423 1.889306

90.32817 -7.785338 2.055964

90.3244 -8.100827 2.231382

90.31933 -8.432561 2.41597

90.31261 -8.781217 2.610152

90.30408 -9.147479 2.814363

90.29377 -9.532069 3.029037

90.28117 -9.935652 3.254683

90.26613 -10.35895 3.49175

90.24841 -10.80266 3.740727

90.22772 -11.26747 4.002091

90.20337 -11.75402 4.276418

90.17518 -12.26299 4.564184

90.14291 -12.79503 4.865901

90.10593 -13.35071 5.182141

90.06366 -13.93055 5.513504

90.01534 -14.53496 5.860662

89.96131 -15.16463 6.223947

89.90038 -15.81978 6.604089

89.83228 -16.50091 7.001443

89.75643 -17.20833 7.41646

89.67229 -17.94228 7.849602

89.57913 -18.70287 8.301327

89.47624 -19.49014 8.77207

89.36295 -20.30401 9.262214

89.23852 -21.14432 9.772086

89.10241 -22.01083 10.30199

88.95393 -22.90311 10.85218

88.7924 -23.82064 11.42285

88.6171 -24.76277 12.0141

88.42735 -25.72867 12.62601

88.2226 -26.71744 13.25855

88.00227 -27.72799 13.91164

87.76594 -28.75916 14.58507

87.51311 -29.80959 15.27858

87.24339 -30.87784 15.9918

86.9565 -31.9623 16.72424

86.65228 -33.06128 17.47536

86.33054 -34.17299 18.24447

85.99242 -35.29622 19.03031

85.63542 -36.42741 19.83306

85.26122 -37.56538 20.65117

84.87005 -38.70797 21.48357

84.46227 -39.85306 22.32907

84.03843 -40.99844 23.18642

83.59896 -42.14182 24.05431

83.14448 -43.28091 24.93143

82.67619 -44.41372 25.81631

82.19533 -45.53841 26.70727

81.70274 -46.65294 27.60262

81.19836 -47.75426 28.50135

80.68317 -48.8401 29.40212

80.16112 -49.911 30.30227

79.63514 -50.96663 31.19973

79.10552 -52.00383 32.09408

78.57064 -53.01581 32.98787

78.03571 -54.00257 33.88032

77.50209 -54.96196 34.77088

76.97075 -55.89385 35.65683

76.44224 -56.79624 36.53743

75.9189 -57.67105 37.4093

75.40102 -58.51659 38.27175

74.8903 -59.33424 39.12219

74.38709 -60.12285 39.9599

73.89243 -60.88326 40.783

73.40725 -61.61555 41.59051

72.9321 -62.32001 42.38126

72.46749 -62.99674 43.15446

72.0142 -63.64671 43.90908

71.57251 -64.27003 44.64451

71.1428 -64.86741 45.36016

70.72534 -65.43937 46.05557

70.32036 -65.98626 46.73056

69.9282 -66.50932 47.38457

69.54886 -67.00903 48.01754

69.18232 -67.48586 48.62957

68.82877 -67.94086 49.22051

68.48805 -68.37467 49.7905

68.15997 -68.78777 50.3398

67.84456 -69.18132 50.86844

67.54149 -69.55566 51.37693

67.25074 -69.9119 51.86536

66.97192 -70.25041 52.33434

66.70484 -70.57211 52.78414

66.44925 -70.87778 53.21517

66.20477 -71.16787 53.62803

65.97115 -71.44317 54.02317

65.74815 -71.70449 54.40099

65.53532 -71.95213 54.76221

65.33235 -72.18692 55.10722

65.13892 -72.40939 55.43659

64.95467 -72.62022 55.75085

64.7793 -72.8199 56.05053

64.61245 -73.00898 56.33619

64.45382 -73.18802 56.60837

64.30301 -73.3575 56.86756

64.15972 -73.51786 57.11427

64.02365 -73.66945 57.34915

63.89449 -73.81297 57.57251

63.77192 -73.94869 57.78491

63.65561 -74.07707 57.98683

63.54533 -74.19827 58.17884

63.44077 -74.31298 58.36116

63.34163 -74.42132 58.53442

63.24771 -74.52384 58.69889

63.15871 -74.6208 58.855

63.07445 -74.71225 59.00333

62.99463 -74.79887 59.14397

62.91919 -74.88061 59.27758

62.84785 -74.95795 59.40435

62.78065 -75.03106 59.52481

62.71786 -75.10005 59.63961

62.66013 -75.16386 59.7497

62.6084 -75.22163 59.85599

62.56346 -75.27254 59.95911

62.52915 -75.3131 60.06106

62.50103 -75.34744 60.15924

62.48254 -75.37222 60.25518

62.46925 -75.39169 60.34698

62.46412 -75.40294 60.43577

62.46266 -75.41041 60.52007

62.4687 -75.41032 60.60095

62.47601 -75.40881 60.67719

62.4905 -75.40026 60.7492

62.50702 -75.38985 60.81675

62.5239 -75.37837 60.87994

62.54526 -75.36278 60.93825

62.56749 -75.3466 60.99242

62.58881 -75.33041 61.04319

62.61348 -75.31136 61.0888

62.63815 -75.29216 61.13097

62.66064 -75.27475 61.1714

62.68617 -75.25454 61.20617

62.71119 -75.23463 61.23819

62.73563 -75.21512 61.26768

62.75261 -75.20222 61.30466

62.77749 -75.18207 61.32747

62.80154 -75.16257 61.34819

62.82473 -75.1437 61.36706

62.84706 -75.1255 61.38423

62.86859 -75.10794 61.3999

62.88928 -75.09102 61.41419

62.90916 -75.0747 61.42725

62.92828 -75.05901 61.4392

62.94662 -75.04387 61.45013

62.96424 -75.02936 61.46016

62.98114 -75.01539 61.46936

62.99737 -75.00195 61.47779

63.01294 -74.98903 61.48555

63.02789 -74.9766 61.49268

63.04223 -74.96466 61.49926

63.05601 -74.95319 61.50531

63.06923 -74.94215 61.51092

63.08194 -74.9315 61.51609

63.09414 -74.92126 61.52086

63.10588 -74.91142 61.52529

63.11715 -74.90195 61.5294

63.12801 -74.89281 61.53321

63.13845 -74.884 61.53674

63.14851 -74.8755 61.54004

63.1582 -74.86732 61.54309

63.16755 -74.85939 61.54595

63.17657 -74.85176 61.5486

63.18528 -74.84435 61.55109

63.19368 -74.8372 61.55341

63.20182 -74.83028 61.55558

63.20968 -74.82358 61.55761

63.21729 -74.81709 61.55953

# section 6

XYZ

240

101.9561 -1.664808 -1.087105

101.9559 -1.675441 -1.085417

101.9557 -1.686295 -1.08304

101.9555 -1.697375 -1.079983

101.9552 -1.708682 -1.076267

101.955 -1.72022 -1.071829

101.9548 -1.731975 -1.066678

101.9546 -1.744173 -1.061317

101.9545 -1.756754 -1.05555

101.9543 -1.769828 -1.049537

101.9542 -1.783443 -1.043298

101.9541 -1.797592 -1.036751

101.954 -1.812333 -1.029924

101.9539 -1.827703 -1.022799

101.9538 -1.843738 -1.01536

101.9537 -1.860489 -1.007603

101.9536 -1.877976 -0.9994719

101.9535 -1.896257 -0.990967

101.9535 -1.915378 -0.9820667

101.9533 -1.935392 -0.9727474

101.9532 -1.956355 -0.9629944

101.9531 -1.978313 -0.9527565

101.953 -2.001331 -0.942021

101.9528 -2.025475 -0.9307583

101.9527 -2.050811 -0.9189419

101.9525 -2.077406 -0.9065249

101.9523 -2.105337 -0.8934792

101.9521 -2.134684 -0.8797676

101.9519 -2.165533 -0.8653571

101.9517 -2.197966 -0.8501872

101.9513 -2.23208 -0.8342245

101.9511 -2.26798 -0.8174315

101.9507 -2.305759 -0.7997335

101.9503 -2.345534 -0.7810925

101.9499 -2.387428 -0.7614622

101.9495 -2.431552 -0.7407568

101.949 -2.478044 -0.7189281

101.9484 -2.527047 -0.695922

101.9479 -2.578694 -0.6716343

101.9472 -2.633147 -0.6460127

101.9465 -2.690573 -0.6189857

101.9457 -2.751132 -0.5904454

101.9449 -2.815018 -0.5603309

101.9439 -2.882408 -0.528517

101.9429 -2.953518 -0.4949407

101.9416 -3.028541 -0.4594502

101.9403 -3.107711 -0.4219638

101.9388 -3.191276 -0.3823808

101.9372 -3.279472 -0.3405619

101.9353 -3.372551 -0.296353

101.9334 -3.470805 -0.2496574

101.9312 -3.574504 -0.2002803

101.9288 -3.683971 -0.148117

101.9262 -3.799511 -0.0929735

101.9233 -3.921468 -0.034705736

101.9201 -4.050189 0.026872491

101.9164 -4.186028 0.091980986

101.9124 -4.329382 0.160785

101.9079 -4.480654 0.2335023

101.9029 -4.640265 0.3103494

101.8974 -4.80865 0.3915812

101.8913 -4.986285 0.4773998

101.8847 -5.173638 0.5680783

101.8773 -5.371206 0.6638876

101.869 -5.579503 0.7651111

101.8598 -5.79907 0.8720421

101.8495 -6.030471 0.9849762

101.8382 -6.274282 1.104257

101.8258 -6.531127 1.230168

101.812 -6.801609 1.363084

101.7967 -7.08636 1.503365

101.7795 -7.386035 1.651386

101.7607 -7.701337 1.807506

101.7397 -8.032915 1.972205

101.7166 -8.381499 2.145867

101.6911 -8.747804 2.328926

101.6627 -9.132552 2.521828

101.6312 -9.536475 2.725033

101.5966 -9.960367 2.938974

101.5584 -10.40489 3.164263

101.5163 -10.87084 3.401331

101.47 -11.35897 3.650693

101.4192 -11.87002 3.912845

101.363 -12.40458 4.18845

101.3011 -12.96344 4.477961

101.2334 -13.54729 4.781924

101.1589 -14.15668 5.10097

101.0771 -14.79216 5.435731

100.9871 -15.45415 5.786911

100.8892 -16.14346 6.154719

100.7819 -16.8603 6.539903

100.665 -17.60523 6.942705

100.5378 -18.37862 7.363504

100.3996 -19.18074 7.802728

100.2496 -20.01168 8.260811

100.087 -20.87144 8.738186

99.91089 -21.75994 9.235194

99.72057 -22.67701 9.752101

99.51534 -23.62234 10.28916

99.29446 -24.5955 10.84659

99.05711 -25.59589 11.42449

98.80248 -26.6228 12.02291

98.52979 -27.67532 12.64184

98.23838 -28.75243 13.28118

97.92769 -29.85298 13.94077

97.59718 -30.97567 14.62036

97.24633 -32.11901 15.31957

96.87469 -33.28142 16.03795

96.48199 -34.46114 16.77494

96.06802 -35.65633 17.52991

95.63267 -36.86498 18.3021

95.17725 -38.0858 19.09027

94.6989 -39.3149 19.89432

94.19967 -40.55094 20.71277

93.67977 -41.79158 21.54447

93.13975 -43.03447 22.38819

92.58026 -44.27718 23.24265

92.00184 -45.51715 24.10653

91.40518 -46.75185 24.97845

90.79183 -47.9792 25.85688

90.16338 -49.19724 26.74014

89.52088 -50.40358 27.62666

88.8642 -51.59491 28.51531

88.19457 -52.7688 29.40469

87.51678 -53.92585 30.29248

86.83447 -55.06581 31.17679

86.14782 -56.18541 32.05711

85.4543 -57.27772 32.9352

84.75982 -58.34357 33.81001

84.06568 -59.38042 34.68136

83.37346 -60.38743 35.54745

82.68379 -61.36242 36.4076

81.99988 -62.3074 37.25872

81.3221 -63.22039 38.10028

80.65282 -64.10284 38.92986

79.99246 -64.95332 39.74694

79.34267 -65.77275 40.54981

78.70454 -66.56119 41.33749

78.07892 -67.31892 42.10896

77.46657 -68.04604 42.86352

76.86853 -68.74363 43.60012

76.28529 -69.41177 44.31828

75.71738 -70.05127 45.01742

75.16527 -70.66273 45.69707

74.62921 -71.24657 46.35711

74.10978 -71.80421 46.99692

73.60706 -72.33617 47.6165

73.12096 -72.84299 48.21592

72.65182 -73.32594 48.79494

72.19943 -73.78572 49.35374

71.76365 -74.22286 49.89258

71.34451 -74.63873 50.41146

70.9416 -75.03369 50.91085

70.55489 -75.40903 51.3908

70.18391 -75.76514 51.8519

69.82841 -76.10311 52.29438

69.48812 -76.42378 52.71865

69.16253 -76.72769 53.12529

68.85133 -77.01573 53.51466

68.55415 -77.2888 53.88718

68.27048 -77.54724 54.24352

67.99989 -77.79194 54.58408

67.74193 -78.02352 54.90939

67.49619 -78.24274 55.21993

67.26224 -78.45016 55.51621

67.0396 -78.64635 55.79877

66.82788 -78.83193 56.06812

66.62658 -79.00742 56.32474

66.43529 -79.17334 56.56915

66.25359 -79.33001 56.80195

66.08109 -79.47823 57.02344

65.91737 -79.61829 57.23414

65.76199 -79.75066 57.43454

65.61463 -79.8755 57.62522

65.47491 -79.99361 57.80634

65.34241 -80.10507 57.97855

65.21684 -80.21048 58.14207

65.09785 -80.31013 58.29732

64.98516 -80.40405 58.4449

64.87836 -80.49299 58.58486

64.77728 -80.57687 58.71783

64.68159 -80.6562 58.84399

64.59109 -80.73115 58.96378

64.50572 -80.80186 59.07767

64.42554 -80.86813 59.18623

64.35073 -80.9298 59.28996

64.28143 -80.98671 59.38936

64.21918 -81.03743 59.48573

64.16262 -81.08331 59.57859

64.11373 -81.12247 59.66964

64.07128 -81.15631 59.75821

64.0377 -81.18248 59.84637

64.00996 -81.20396 59.93154

63.99228 -81.21694 60.01662

63.97765 -81.22756 60.09732

63.97379 -81.22935 60.17682

63.97398 -81.22802 60.25233

63.97605 -81.22511 60.32324

63.9856 -81.21623 60.39041

63.99751 -81.20573 60.45332

64.00933 -81.19516 60.51217

64.02709 -81.18 60.56612

64.04587 -81.16412 60.61618

64.0623 -81.15015 60.66397

64.08434 -81.13186 60.70568

64.10648 -81.11354 60.74412

64.12861 -81.09528 60.77954

64.1396 -81.08571 60.82407

64.16413 -81.06569 60.85145

64.18806 -81.04625 60.87639

64.21127 -81.02735 60.89914

64.23382 -81.00906 60.91986

64.25568 -80.99134 60.93877

64.2768 -80.97423 60.95601

64.29723 -80.95767 60.97174

64.31696 -80.9417 60.98611

64.33599 -80.92628 60.99925

64.35432 -80.91145 61.01125

64.37199 -80.89717 61.02225

64.38905 -80.8834 61.03228

64.40543 -80.87015 61.04149

64.42121 -80.85738 61.04993

64.43641 -80.84512 61.05769

64.45105 -80.8333 61.0648

64.46513 -80.82193 61.07135

64.4787 -80.81097 61.07737

64.49175 -80.80041 61.08291

64.50431 -80.79027 61.08802

64.51643 -80.78049 61.09275

64.52809 -80.77105 61.09711

64.53935 -80.76198 61.10114

64.55019 -80.7532 61.10487

64.56067 -80.74476 61.10834

64.57078 -80.73658 61.11155

64.58055 -80.72869 61.11452

64.58999 -80.72105 61.11729

64.59911 -80.71368 61.11987

64.60794 -80.70655 61.12226

64.61649 -80.69964 61.12452

64.62477 -80.69294 61.12661

# section 7

XYZ

240

111.5189 -1.335334 -1.063672

111.5187 -1.346613 -1.061845

111.5186 -1.358136 -1.059318

111.5183 -1.369928 -1.056141

111.5181 -1.382017 -1.052394

111.5179 -1.394419 -1.048021

111.5176 -1.407161 -1.043105

111.5172 -1.42039 -1.037998

111.5168 -1.434098 -1.032572

111.5163 -1.448351 -1.026928

111.5159 -1.463181 -1.021054

111.5154 -1.478625 -1.014928

111.5148 -1.494717 -1.008539

111.5142 -1.511495 -1.00187

111.5135 -1.529001 -0.9949053

111.5129 -1.547284 -0.9876458

111.5122 -1.566376 -0.980028

111.5114 -1.586333 -0.9720584

111.5106 -1.607208 -0.9637155

111.5097 -1.629055 -0.9549775

111.5088 -1.65194 -0.9458359

111.5078 -1.675906 -0.9362274

111.5068 -1.701029 -0.9261488

111.5057 -1.727378 -0.9155718

111.5046 -1.75503 -0.9044783

111.5034 -1.784048 -0.8928041

111.5021 -1.814522 -0.880534

111.5008 -1.846537 -0.8676323

111.4994 -1.880193 -0.8540757

111.4979 -1.915565 -0.8397831

111.4962 -1.952768 -0.824737

111.4945 -1.99192 -0.8089132

111.4927 -2.033107 -0.7922086

111.4908 -2.076468 -0.7746062

111.4887 -2.122138 -0.7560727

111.4865 -2.170224 -0.7364925

111.4842 -2.220885 -0.7158376

111.4818 -2.274281 -0.6940697

111.4791 -2.330538 -0.6710474

111.4763 -2.389843 -0.6467458

111.4734 -2.452382 -0.6211036

111.4702 -2.518313 -0.5939866

111.4668 -2.587862 -0.5653673

111.4632 -2.661201 -0.5350854

111.4593 -2.738585 -0.5031194

111.455 -2.820194 -0.4692669

111.4505 -2.906304 -0.4334896

111.4457 -2.997165 -0.395665

111.4405 -3.093048 -0.3556764

111.4349 -3.194202 -0.3133289

111.4289 -3.300967 -0.2685743

111.4225 -3.413606 -0.2211675

111.4157 -3.53249 -0.1710461

111.4083 -3.657923 -0.1179781

111.4005 -3.790292 -0.061844952

111.392 -3.929962 -0.0024508031

111.3827 -4.077298 0.060453482

111.3727 -4.232743 0.1270033

111.3619 -4.396723 0.1974317

111.3502 -4.569687 0.2719611

111.3376 -4.752085 0.3508797

111.3241 -4.944444 0.4343554

111.3096 -5.147258 0.5226863

111.2938 -5.361051 0.6161518

111.2766 -5.586369 0.7150473

111.2579 -5.823784 0.8196795

111.2377 -6.073903 0.9303512

111.2158 -6.337319 1.04744

111.1922 -6.614725 1.171201

111.1666 -6.906741 1.302044

111.1387 -7.214036 1.440344

111.1083 -7.537302 1.586492

111.0753 -7.877295 1.740845

111.0394 -8.234676 1.903946

111.0006 -8.61023 2.076178

110.9584 -9.004709 2.257991

110.9123 -9.41887 2.449851

110.8621 -9.853485 2.652235

110.8078 -10.30941 2.865579

110.7487 -10.7873 3.090576

110.6845 -11.28801 3.327645

110.6149 -11.81234 3.577321

110.5396 -12.36105 3.840115

110.4574 -12.93475 4.116762

110.3681 -13.53427 4.407694

110.2714 -14.16033 4.713488

110.1664 -14.8135 5.034821

110.0525 -15.49433 5.372351

109.9285 -16.20324 5.72681

109.7947 -16.94115 6.098304

109.6497 -17.70825 6.487596

109.493 -18.50518 6.894837

109.3239 -19.33235 7.32035

109.1417 -20.19001 7.764528

108.9454 -21.07829 8.227795

108.7341 -21.99713 8.710574

108.5068 -22.94644 9.213177

108.2628 -23.92605 9.735816

108.0013 -24.93563 10.27871

107.7214 -25.9747 10.84203

107.4223 -27.04263 11.42582

107.103 -28.13861 12.03008

106.7627 -29.26172 12.65473

106.4007 -30.41084 13.29962

106.0163 -31.58473 13.96452

105.6091 -32.78199 14.64911

105.1783 -34.00106 15.35297

104.7236 -35.2402 16.07556

104.2447 -36.49755 16.81626

103.7413 -37.77113 17.57438

103.2134 -39.0588 18.34908

102.6623 -40.35915 19.13913

102.0851 -41.66802 19.94425

101.484 -42.984 20.76298

100.8592 -44.30454 21.59411

100.2114 -45.62714 22.43638

99.54135 -46.94916 23.28848

98.84969 -48.26785 24.14908

98.13718 -49.58046 25.01677

97.40562 -50.88488 25.88994

96.65686 -52.17897 26.76693

95.8922 -53.46014 27.64625

95.11143 -54.72484 28.52669

94.31592 -55.97045 29.40679

93.51125 -57.19772 30.2845

92.7015 -58.40642 31.15811

91.88689 -59.59314 32.02697

91.06407 -60.75093 32.89227

90.23958 -61.88124 33.75272

89.41464 -62.98122 34.60841

88.5913 -64.04945 35.45831

87.77029 -65.08358 36.30182

86.95552 -66.08575 37.13602

86.14743 -67.05372 37.96054

85.34894 -67.98897 38.77312

84.5605 -68.88985 39.5734

83.7843 -69.75739 40.35978

83.02151 -70.59161 41.1313

82.27328 -71.39275 41.88706

81.54052 -72.16094 42.62643

80.82452 -72.89732 43.34835

80.12593 -73.60199 44.05243

79.4454 -74.2758 44.73811

78.78354 -74.91949 45.40494

78.14067 -75.53342 46.05278

77.51753 -76.11925 46.68102

76.91424 -76.67751 47.28968

76.33074 -77.20876 47.87881

75.76737 -77.71449 48.44814

75.224 -78.19542 48.99781

74.70044 -78.65215 49.52814

74.19678 -79.08622 50.03906

73.71249 -79.49797 50.53102

73.24757 -79.88887 51.00406

72.80148 -80.25934 51.45874

72.37395 -80.61056 51.89527

71.96464 -80.94345 52.31401

71.57294 -81.25862 52.71558

71.1985 -81.55704 53.10027

70.8409 -81.83968 53.46845

70.49949 -82.10693 53.82082

70.17377 -82.35971 54.15777

69.86324 -82.59872 54.47977

69.56738 -82.82476 54.78727

69.28568 -83.03848 55.08078

69.0176 -83.24048 55.36081

68.7626 -83.43139 55.62785

68.52016 -83.61179 55.88238

68.28974 -83.78222 56.1249

68.07085 -83.94303 56.35603

67.86305 -84.09509 56.57598

67.6658 -84.23869 56.7853

67.47858 -84.37432 56.98446

67.30101 -84.50211 57.17406

67.13262 -84.62299 57.35421

66.97294 -84.73699 57.52555

66.82159 -84.84476 57.6883

66.67815 -84.94662 57.84285

66.54227 -85.04253 57.98983

66.41349 -85.13338 58.12921

66.29153 -85.219 58.26168

66.17597 -85.29993 58.38734

66.06651 -85.37639 58.50658

65.96273 -85.44849 58.61974

65.86427 -85.51678 58.72704

65.77063 -85.58164 58.82868

65.68149 -85.64342 58.92505

65.59645 -85.70242 59.01689

65.51673 -85.75771 59.10539

65.44307 -85.8086 59.19247

65.37684 -85.85413 59.2784

65.32009 -85.89248 59.36604

65.27091 -85.92536 59.45193

65.23391 -85.94901 59.54042

65.20142 -85.96951 59.62478

65.18258 -85.97974 59.71037

65.16946 -85.98579 59.79238

65.15947 -85.98985 59.86956

65.1594 -85.98646 59.94395

65.16289 -85.98058 60.01398

65.16697 -85.97457 60.07943

65.1791 -85.9626 60.14017

65.19307 -85.94943 60.19667

65.20458 -85.93826 60.25046

65.22375 -85.92155 60.29781

65.24356 -85.9045 60.34148

65.26381 -85.88727 60.38176

65.26992 -85.88042 60.43242

65.29417 -85.86052 60.46353

65.31799 -85.84111 60.49192

65.34125 -85.82219 60.51783

65.36395 -85.80383 60.54144

65.38608 -85.78597 60.56298

65.40757 -85.7687 60.58262

65.42843 -85.75195 60.60054

65.44866 -85.73576 60.61689

65.46825 -85.7201 60.63181

65.48717 -85.70502 60.64543

65.50547 -85.69048 60.65788

65.52317 -85.67644 60.66922

65.54023 -85.66291 60.67962

65.5567 -85.64987 60.68913

65.5726 -85.63734 60.69784

65.58793 -85.62524 60.70581

65.60271 -85.6136 60.71314

65.61697 -85.60238 60.71985

65.63071 -85.59158 60.72601

65.64397 -85.58118 60.73168

65.65675 -85.57116 60.73691

65.6691 -85.56149 60.74172

65.681 -85.55217 60.74616

65.69249 -85.5432 60.75025

65.7036 -85.53452 60.75404

65.71433 -85.52615 60.75753

65.72471 -85.51805 60.76077

65.73474 -85.51024 60.76377

65.74445 -85.50268 60.76656

65.75385 -85.49537 60.76915

65.76296 -85.48827 60.77157

65.77178 -85.48142 60.77382

# section 8

XYZ

240

118.5829 -1.09196 -1.046361

118.5828 -1.103712 -1.044429

118.5826 -1.115734 -1.041796

118.5824 -1.12805 -1.038532

118.5821 -1.140719 -1.034759

118.5818 -1.15376 -1.030438

118.5816 -1.167224 -1.025689

118.5807 -1.181218 -1.020774

118.5803 -1.195755 -1.015602

118.5798 -1.210882 -1.010229

118.5789 -1.226604 -1.004618

118.5783 -1.243012 -0.9988062

118.5771 -1.260103 -0.9927413

118.576 -1.277919 -0.9864089

118.5754 -1.296507 -0.9797941

118.5741 -1.315924 -0.9729023

118.5728 -1.336203 -0.9656648

118.5715 -1.357402 -0.9580926

118.5701 -1.379572 -0.950161

118.5686 -1.40277 -0.9418519

118.5673 -1.427074 -0.9331607

118.5657 -1.452522 -0.9240162

118.5642 -1.479198 -0.9144228

118.5624 -1.507179 -0.9043533

118.5603 -1.536544 -0.8937933

118.5585 -1.567347 -0.8826698

118.5566 -1.599701 -0.8709727

118.5541 -1.633687 -0.8586665

118.5518 -1.669411 -0.8457434

118.5495 -1.706965 -0.8320984

118.5469 -1.746441 -0.8177299

118.5441 -1.787998 -0.8026195

118.5411 -1.831705 -0.7866497

118.5382 -1.877705 -0.7698165

118.5348 -1.926177 -0.7520924

118.5315 -1.977185 -0.7333432

118.5275 -2.030925 -0.7135546

118.5241 -2.08757 -0.6927007

118.5196 -2.147228 -0.6706144

118.5151 -2.210119 -0.647288

118.5107 -2.276433 -0.6226691

118.5056 -2.346339 -0.5966021

118.5007 -2.420065 -0.5690891

118.4948 -2.497798 -0.5399362

118.4887 -2.579818 -0.5091597

118.4821 -2.666291 -0.4765184

118.4754 -2.757527 -0.4420032

118.4684 -2.853774 -0.4054777

118.4602 -2.955346 -0.3668403

118.452 -3.062463 -0.3258685

118.4432 -3.175509 -0.2825484

118.4333 -3.294748 -0.2365967

118.4233 -3.420591 -0.1879836

118.4126 -3.553336 -0.1364486

118.4011 -3.693404 -0.081891857

118.3889 -3.841156 -0.024111532

118.3751 -3.996994 0.037164729

118.3606 -4.161364 0.1020497

118.3455 -4.334721 0.1707864

118.3287 -4.517551 0.2436035

118.3111 -4.710305 0.320814

118.292 -4.913546 0.4025582

118.2717 -5.127769 0.4891569

118.2496 -5.35356 0.5808913

118.2258 -5.591442 0.6780673

118.1999 -5.842047 0.7809989

118.1724 -6.105988 0.8899993

118.1427 -6.38389 1.00547

118.1108 -6.676483 1.127646

118.0768 -6.984388 1.256951

118.0392 -7.308335 1.393791

117.9993 -7.649027 1.538556

117.9558 -8.007283 1.691604

117.9091 -8.383728 1.853525

117.8586 -8.779169 2.024705

117.8039 -9.194489 2.205594

117.7447 -9.630355 2.396682

117.6809 -10.08764 2.598457

117.612 -10.56721 2.811363

117.5374 -11.06974 3.036148

117.4569 -11.59614 3.273217

117.3701 -12.14726 3.523121

117.2768 -12.72377 3.786387

117.1755 -13.32637 4.063818

117.0656 -13.95591 4.355801

116.9475 -14.61317 4.662929

116.8202 -15.29868 4.985971

116.6822 -16.01302 5.325534

116.5334 -16.75651 5.682409

116.3729 -17.53038 6.056631

116.2004 -18.33458 6.448965

116.0141 -19.16999 6.859464

115.8142 -20.0369 7.288474

115.5994 -20.93558 7.736324

115.3689 -21.86612 8.203379

115.1213 -22.82863 8.690204

114.8567 -23.82289 9.196936

114.5729 -24.84869 9.72378

114.2698 -25.9057 10.27101

113.9462 -26.99347 10.83867

113.6013 -28.11124 11.4268

113.2343 -29.25829 12.0354

112.8443 -30.43362 12.66425

112.43 -31.63588 13.31326

111.9915 -32.86396 13.98208

111.5272 -34.11636 14.67032

111.0377 -35.39143 15.37767

110.5215 -36.68714 16.1034

109.9787 -38.00186 16.84677

109.4097 -39.33337 17.60726

108.8129 -40.67927 18.38378

108.1915 -42.03844 19.17524

107.5413 -43.40633 19.98119

106.8648 -44.7814 20.80007

106.1626 -46.16072 21.63078

105.4352 -47.54234 22.47194

104.6835 -48.9229 23.32234

103.908 -50.29981 24.18056

103.1103 -51.66985 25.04505

102.2913 -53.0313 25.9143

101.4536 -54.38142 26.78667

100.5989 -55.71803 27.66068

99.72626 -57.03676 28.53509

98.83765 -58.33544 29.40833

97.93908 -59.61457 30.27862

97.03528 -60.87396 31.14426

96.12613 -62.1105 32.00483

95.20802 -63.31644 32.86063

94.28735 -64.49438 33.71044

93.36597 -65.64104 34.55441

92.4457 -66.75452 35.39252

91.52744 -67.83242 36.22371

90.61629 -68.8766 37.04533

89.71188 -69.88535 37.85726

88.8178 -70.85984 38.65725

87.93474 -71.7977 39.44519

87.06552 -72.70103 40.21951

86.21041 -73.56887 40.97901

85.37153 -74.40199 41.72304

84.54967 -75.20033 42.45122

83.74682 -75.96571 43.16246

82.96315 -76.69732 43.85595

82.19921 -77.39632 44.53181

81.45625 -78.06408 45.18913

80.73438 -78.69986 45.828

80.03463 -79.30649 46.44758

79.35735 -79.88429 47.04836

78.70172 -80.43354 47.6297

78.06889 -80.95604 48.192

77.45828 -81.45259 48.73495

76.8698 -81.92386 49.25887

76.30347 -82.37134 49.76392

75.75923 -82.7954 50.25053

75.23666 -83.19804 50.71829

74.73513 -83.57915 51.16821

74.2544 -83.93993 51.60051

73.79411 -84.28221 52.01508

73.35369 -84.6053 52.41298

72.9323 -84.91154 52.79407

72.52994 -85.20145 53.15914

72.14596 -85.4749 53.50846

71.77937 -85.73373 53.84287

71.43019 -85.97839 54.16236

71.09735 -86.20943 54.46762

70.78043 -86.42772 54.75916

70.47871 -86.63407 55.03725

70.19178 -86.82887 55.30261

69.91911 -87.01275 55.5557

69.65961 -87.18651 55.79683

69.41331 -87.35067 56.02658

69.17919 -87.50543 56.24542

68.95731 -87.65185 56.45364

68.74655 -87.78971 56.65195

68.54662 -87.91978 56.84071

68.35695 -88.04279 57.02028

68.17758 -88.15849 57.19104

68.00676 -88.26801 57.353

67.84538 -88.37151 57.50723

67.69264 -88.46906 57.65366

67.54762 -88.56106 57.79251

67.41003 -88.64787 57.92468

67.27991 -88.73039 58.05005

67.15645 -88.80798 58.16875

67.03921 -88.88074 58.28135

66.92683 -88.95063 58.38781

66.81966 -89.01772 58.48803

66.71547 -89.08332 58.58216

66.61366 -89.14855 58.67063

66.51706 -89.21053 58.75581

66.42496 -89.27033 58.84006

66.34134 -89.32428 58.92403

66.2673 -89.37167 59.01114

66.20241 -89.41294 59.09759

66.15091 -89.44444 59.1886

66.10546 -89.47217 59.27575

66.07548 -89.48865 59.36581

66.05233 -89.5003 59.45258

66.03384 -89.50937 59.5345

66.02654 -89.51041 59.61422

66.02384 -89.50787 59.68956

66.02232 -89.50525 59.75978

66.03001 -89.4955 59.82555

66.04058 -89.48403 59.88682

66.04823 -89.47511 59.94507

66.06564 -89.4595 59.99661

66.08331 -89.4436 60.04396

66.1024 -89.42699 60.08786

66.10466 -89.42233 60.14302

66.12888 -89.40247 60.17691

66.15267 -89.38303 60.20783

66.17593 -89.36414 60.23622

66.19865 -89.34572 60.26183

66.22128 -89.32787 60.28533

66.24282 -89.31017 60.30689

66.2642 -89.29336 60.32625

66.2845 -89.27716 60.34424

66.30463 -89.26105 60.36031

66.32409 -89.2459 60.37529

66.34292 -89.23132 60.38863

66.36072 -89.21679 60.40107

66.37833 -89.20326 60.4123

66.39534 -89.19012 60.42265

66.4118 -89.17718 60.43193

66.42768 -89.16502 60.44072

66.44301 -89.15333 60.4486

66.45782 -89.14162 60.45587

66.4721 -89.13069 60.46234

66.48591 -89.12029 60.46854

66.49924 -89.10983 60.47407

66.51166 -89.10005 60.47918

66.52413 -89.09077 60.48389

66.53616 -89.08125 60.48827

66.54782 -89.07264 60.49232

66.55909 -89.06419 60.49609

66.57 -89.05605 60.49936

66.5806 -89.04784 60.50262

66.59038 -89.04025 60.50566

66.60031 -89.0329 60.50828

66.60995 -89.02577 60.51095

66.61884 -89.01843 60.51323

NI_END nibladegeometry

NI_END NIBlade

NI_END nirow

NI_END GEOMTURBO

3D-opt rotor

GEOMETRY TURBO

VERSION 5.5

TOLERANCE 1e-006

UNITS Millimeters

UNITS-FACTOR 0.001

NI_BEGIN CHANNEL

NI_BEGIN basic_curve

NAME hub

DISCRETISATION 10

DATA_REDUCTION 0

NI_BEGIN zrcurve

ZR polyline

61

-51.5 53.9

-49.21561 53.90031

-46.93121 53.90062

-44.64682 53.90092

-42.36243 53.90123

-40.07804 53.90154

-37.794 53.90379

-35.51014 53.907

-33.22628 53.91021

-30.94242 53.91342

-28.65973 53.92262

-26.37783 53.93597

-24.09594 53.94931

-21.81616 53.9735

-19.53892 54.01066

-17.26186 54.04875

-14.9933 54.13031

-12.72597 54.21823

-10.47087 54.36922

-8.224883 54.56771

-5.990868 54.82878

-3.773875 55.17958

-1.575784 55.63179

0.607303 56.16594

2.7778 56.77041

4.938821 57.42956

7.093251 58.1285

9.24334 58.85529

11.39071 59.60115

13.53626 60.36176

15.68118 61.12989

17.82587 61.90254

19.97054 62.67826

22.11536 63.45613

24.26044 64.23514

26.40571 65.01463

28.55114 65.79447

30.69671 66.57465

32.84226 67.35525

34.98771 68.13633

37.13298 68.91798

39.27785 69.70074

41.42223 70.48467

43.56609 71.2699

45.70932 72.05659

47.85183 72.84492

49.9935 73.63507

52.13438 74.42683

54.27462 75.21958

56.41451 76.01243

58.55453 76.80369

60.69574 77.58956

62.8397 78.3652

64.98862 79.12299

67.14771 79.84467

69.32126 80.51403

71.51443 81.10916

73.73013 81.61211

75.96819 82.11244

78.22631 82.50605

80.5 83

NI_END zrcurve

NI_END basic_curve

NI_BEGIN basic_curve

NAME shroud

DISCRETISATION 10

DATA_REDUCTION 0

NI_BEGIN zrcurve

ZR polyline

61

-51.5 114

-49.29776 114

-47.09553 114

-44.89329 114

-42.69106 114

-40.48882 114

-38.28658 114

-36.08435 114

-33.88211 114

-31.67988 114

-29.47764 114

-27.2754 114

-25.07317 114

-22.87093 114

-20.6687 114

-18.46646 114

-16.26423 114

-14.06199 114

-11.85976 114

-9.657521 114

-7.455283 114

-5.253046 114

-3.050811 114

-0.8485787 114

1.353657 114

3.555809 113.9975

5.753081 113.8497

7.950353 113.7019

10.14762 113.5541

12.3449 113.4063

14.54217 113.2586

16.73944 113.1108

18.93671 112.963

21.13398 112.8152

23.33126 112.6674

25.52852 112.5196

27.7258 112.3719

29.92307 112.2241

32.12035 112.0763

34.31761 111.9285

36.51489 111.7807

38.71216 111.6329

40.90943 111.4852

43.1067 111.3374

45.30398 111.1896

47.50124 111.0418

49.69851 110.894

51.89579 110.7462

54.09306 110.5984

56.29033 110.4507

58.4876 110.3029

60.68488 110.1551

62.88215 110.0073

65.08435 110.0015

67.28658 110.0003

69.48882 110

71.69106 110

73.8933 110

76.09553 110

78.29777 110

80.5 110

NI_END zrcurve

NI_END basic_curve

NI_BEGIN channel_curve hub

NAME hub

VERTEX CURVE_P hub 0

VERTEX CURVE_P hub 1

NI_END channel_curve hub

NI_BEGIN channel_curve shroud

NAME shroud

VERTEX CURVE_P shroud 0

VERTEX CURVE_P shroud 1

NI_END channel_curve shroud

NI_BEGIN channel_curve nozzle

NAME nozzle

NI_END channel_curve nozzle

NI_END CHANNEL

NI_BEGIN nirow

NAME row 1

TYPE normal

PERIODICITY 15

ROTATION_SPEED 45000

NI_BEGIN NINonAxiSurfaces hub

NAME non axisymmetric hub

REPETITION 0

NI_END NINonAxiSurfaces hub

NI_BEGIN NINonAxiSurfaces shroud

NAME non axisymmetric shroud

REPETITION 0

NI_END NINonAxiSurfaces shroud

NI_BEGIN NINonAxiSurfaces tip_gap

NAME non axisymmetric tip gap

REPETITION 0

NI_END NINonAxiSurfaces tip_gap

NI_BEGIN NIBlade

NAME Main Blade

NI_BEGIN NITipGap

WIDTH_AT_LEADING_EDGE 0.2

WIDTH_AT_TRAILING_EDGE 0.2

NI_BEGIN NINonAxiSurfaces hub

NAME non axisymmetric hub

REPETITION 0

NI_END NINonAxiSurfaces hub

NI_END NITipGap

NI_BEGIN nibladegeometry

TYPE GEOMTURBO

GEOMETRY_MODIFIED 0

GEOMETRY TURBO VERSION 5

blade_expansion_factor_hub 0.3

blade_expansion_factor_shroud 0.15

intersection_npts 10

intersection_control 1

data_reduction 1

data_reduction_spacing_tolerance 1e-006

data_reduction_angle_tolerance 90

control_points_distribution 0 9 241 9 160 0.00998472303071045 0.0106282877266306

units 1

number_of_blades 15

blade_tangential_definition 0

suction

SECTIONAL

8

# section 1

XYZ

240

49.35203 0.8562099 0.4036607

49.35196 0.8640092 0.4042588

49.35193 0.8720027 0.4053636

49.35165 0.8801813 0.4070016

49.35161 0.8885343 0.4091857

49.35156 0.8970156 0.4121236

49.35131 0.9054373 0.4161471

49.35165 0.9138175 0.4208957

49.35215 0.9218901 0.4266031

49.35368 0.9291853 0.4333345

49.35793 0.9347176 0.4411824

49.3644 0.9375942 0.4502481

49.37131 0.9379365 0.4603157

49.37868 0.935806 0.4709648

49.38595 0.9313488 0.4818438

49.39326 0.9247075 0.4926848

49.40068 0.9160715 0.5032811

49.40749 0.9056908 0.5134862

49.41397 0.893757 0.5229777

49.42021 0.8805059 0.5314243

49.42541 0.8662838 0.5395254

49.43154 0.8515636 0.5481833

49.43769 0.8365512 0.5576708

49.44386 0.8209962 0.5678074

49.45101 0.8045448 0.5783191

49.45803 0.7877932 0.5898632

49.46581 0.7702034 0.6019996

49.47343 0.7517223 0.6147484

49.48188 0.7323227 0.6281891

49.4905 0.7119328 0.6423375

49.49972 0.6904912 0.6572288

49.50937 0.6679435 0.67292

49.51944 0.6442339 0.6894723

49.53001 0.6192658 0.7068993

49.54128 0.593015 0.7253187

49.5533 0.5653737 0.7447499

49.56563 0.5362543 0.7652375

49.57857 0.5056052 0.7868981

49.59257 0.4733135 0.8097684

49.60699 0.4392848 0.8339164

49.6223 0.4034427 0.8594501

49.63862 0.3656504 0.8864147

49.65543 0.3258405 0.9149598

49.67353 0.283855 0.9450967

49.69223 0.2396181 0.9770169

49.71207 0.1929557 1.010749

49.73331 0.143784 1.046472

49.7551 0.091914535 1.084232

49.77859 0.037255291 1.124238

49.80325 -0.020410836 1.166544

49.82947 -0.08120013 1.211358

49.85668 -0.1453127 1.258785

49.88544 -0.2129317 1.308973

49.91573 -0.2842008 1.362173

49.94769 -0.3593743 1.418458

49.98183 -0.4386307 1.47806

50.01679 -0.5221631 1.541231

50.05432 -0.610247 1.608079

50.09356 -0.703094 1.678863

50.13504 -0.8009573 1.753806

50.17833 -0.90407 1.833239

50.22449 -1.012749 1.917282

50.27245 -1.127269 2.006265

50.32276 -1.247915 2.100443

50.37617 -1.374983 2.200137

50.43187 -1.508831 2.305653

50.49038 -1.64974 2.41729

50.55169 -1.798084 2.535425

50.61599 -1.954222 2.660401

50.6836 -2.118557 2.792531

50.75407 -2.291414 2.932221

50.8278 -2.473251 3.079798

50.90523 -2.664459 3.235826

50.98597 -2.86547 3.400583

51.07012 -3.076683 3.574568

51.15817 -3.298565 3.758173

51.24964 -3.53164 3.951911

51.34483 -3.776306 4.156233

51.44432 -4.033109 4.371462

51.54702 -4.302464 4.59833

51.65369 -4.584947 4.837178

51.76427 -4.881057 5.088491

51.87906 -5.191278 5.352781

51.9973 -5.516051 5.630617

52.11956 -5.856028 5.922339

52.24529 -6.211663 6.228524

52.37501 -6.583504 6.54958

52.5083 -6.97193 6.885952

52.64445 -7.377154 7.238608

52.78427 -7.799582 7.608089

52.92678 -8.239424 7.994776

53.07298 -8.69707 8.399142

53.22186 -9.172862 8.821718

53.37329 -9.666899 9.262816

53.52725 -10.17926 9.723047

53.68312 -10.71048 10.20259

53.84079 -11.26028 10.70178

53.99987 -11.82867 11.22106

54.15973 -12.41571 11.76045

54.32037 -13.02119 12.32026

54.48132 -13.64488 12.90062

54.64196 -14.2865 13.50141

54.80206 -14.94574 14.12254

54.96069 -15.62181 14.76413

55.11828 -16.31454 15.42588

55.27348 -17.02287 16.10749

55.42656 -17.74643 16.80841

55.57683 -18.48408 17.52863

55.72438 -19.23492 18.26667

55.86779 -19.99805 19.02295

56.00699 -20.77208 19.79634

56.14199 -21.55611 20.58584

56.27247 -22.34877 21.39064

56.3978 -23.1489 22.20959

56.51793 -23.95494 23.04154

56.63307 -24.76519 23.8854

56.74265 -25.57902 24.73981

56.84668 -26.39453 25.60363

56.94513 -27.20994 26.4751

57.0374 -28.02439 27.35296

57.12435 -28.83587 28.23575

57.20616 -29.6432 29.12179

57.28189 -30.44518 30.00988

57.35233 -31.23957 30.89814

57.41677 -32.02615 31.78532

57.47579 -32.80399 32.66868

57.53071 -33.57279 33.54498

57.57919 -34.33084 34.41425

57.62232 -35.07822 35.27384

57.65837 -35.81399 36.12153

57.68876 -36.53741 36.95601

57.71339 -37.24826 37.77672

57.73345 -37.94443 38.58202

57.74798 -38.62608 39.37159

57.75812 -39.29169 40.1446

57.76478 -39.94052 40.90088

57.76781 -40.57251 41.63937

57.76793 -41.1867 42.36017

57.76586 -41.78241 43.06263

57.76192 -42.35909 43.74696

57.75602 -42.91721 44.41209

57.74958 -43.45595 45.0587

57.74185 -43.97564 45.68659

57.734 -44.47632 46.29517

57.72596 -44.95764 46.88492

57.7178 -45.41963 47.45603

57.71036 -45.86303 48.00787

57.70293 -46.28772 48.54123

57.69639 -46.69453 49.05627

57.69097 -47.0832 49.55273

57.68637 -47.45433 50.03157

57.68235 -47.8088 50.49258

57.6794 -48.14641 50.93589

57.67753 -48.46808 51.36247

57.67649 -48.77422 51.77188

57.67672 -49.06539 52.16536

57.6777 -49.34155 52.54282

57.68 -49.6042 52.90434

57.68273 -49.8535 53.25127

57.68645 -50.0893 53.58337

57.6912 -50.31317 53.90054

57.69637 -50.52538 54.20461

57.70205 -50.72617 54.49497

57.70896 -50.91624 54.77206

57.71592 -51.09592 55.03704

57.72342 -51.26579 55.2903

57.73185 -51.42612 55.53159

57.74004 -51.57811 55.76146

57.74883 -51.72113 55.98079

57.75743 -51.85631 56.1898

57.76674 -51.98428 56.38855

57.77609 -52.10464 56.57798

57.78524 -52.21839 56.7583

57.79491 -52.32565 56.9296

57.80416 -52.42686 57.093

57.81339 -52.52228 57.24795

57.82278 -52.61259 57.39553

57.83216 -52.69747 57.53551

57.84113 -52.77718 57.66903

57.85017 -52.85265 57.79515

57.85899 -52.92396 57.91522

57.8677 -52.99098 58.02934

57.87625 -53.05392 58.13776

57.88455 -53.11372 58.2407

57.89256 -53.1698 58.33797

57.90033 -53.22278 58.43061

57.90786 -53.2725 58.51842

57.91545 -53.32021 58.60155

57.92231 -53.36443 58.68077

57.92976 -53.40631 58.75562

57.93668 -53.44601 58.82655

57.94304 -53.48303 58.89445

57.94949 -53.51791 58.95855

57.9561 -53.55111 59.01958

57.96244 -53.58195 59.0775

57.96782 -53.61163 59.13199

57.97368 -53.63905 59.18407

57.97953 -53.66488 59.23366

57.98514 -53.68899 59.28061

57.99023 -53.71224 59.32529

57.99522 -53.73401 59.3671

57.99826 -53.75563 59.40601

58.00227 -53.77605 59.44294

58.00493 -53.79519 59.47804

58.00737 -53.81337 59.5107

58.00882 -53.83157 59.541

58.00953 -53.84917 59.5697

58.00922 -53.86649 59.59618

58.00832 -53.88333 59.62026

58.03754 -53.8982 59.6458

58.02679 -53.9138 59.6686

58.01647 -53.9291 59.6871

58.00634 -53.9443 59.703

57.99667 -53.9606 59.7174

57.98725 -53.97604 59.7299

57.97778 -53.9926 59.74068

57.96835 -54.00812 59.75027

57.95938 -54.02272 59.75931

57.95046 -54.03685 59.76715

57.94204 -54.05012 59.77455

57.93363 -54.063 59.78157

57.92549 -54.07508 59.78799

57.91737 -54.08683 59.79369

57.90974 -54.0981 59.79892

57.90236 -54.10861 59.80371

57.895 -54.11893 59.80857

57.8881 -54.12853 59.81238

57.88122 -54.13774 59.81608

57.87433 -54.14682 59.8195

57.86766 -54.15551 59.82286

57.86144 -54.1636 59.82575

57.85519 -54.1716 59.82841

57.84893 -54.17907 59.83064

57.84307 -54.18647 59.8329

57.83741 -54.19358 59.83499

57.83192 -54.20024 59.83669

57.8266 -54.20661 59.8387

57.82121 -54.21323 59.8399

57.8162 -54.21912 59.84143

57.81113 -54.22507 59.84286

# section 2

XYZ

240

56.39392 0.2174792 0.091503277

56.39389 0.2255621 0.092337623

56.39385 0.2338288 0.093706608

56.3938 0.2422665 0.095652342

56.39379 0.2508459 0.098197304

56.39376 0.2595019 0.1015732

56.39375 0.2680087 0.1061379

56.39387 0.2764284 0.1114821

56.39436 0.2845105 0.117822

56.39587 0.2918699 0.1251954

56.39956 0.297711 0.1336527

56.4052 0.3013177 0.1432633

56.41125 0.3027959 0.1538537

56.41755 0.3021591 0.1650997

56.42398 0.2994789 0.1767286

56.43042 0.2948284 0.1885256

56.43678 0.2882801 0.2003156

56.44297 0.2799557 0.2119664

56.44884 0.2697321 0.2230854

56.45403 0.2572235 0.2330179

56.45886 0.2431111 0.2424032

56.46392 0.2283836 0.2522967

56.46922 0.2130861 0.2628096

56.47478 0.1971058 0.2739015

56.48061 0.1802938 0.2854997

56.48674 0.1628227 0.297856

56.49316 0.1444775 0.3108414

56.49992 0.1251988 0.3244818

56.50702 0.1049536 0.3388493

56.51448 0.083671786 0.3539674

56.52232 0.061290625 0.3698796

56.53058 0.037746068 0.3866334

56.53925 0.012980892 0.4042966

56.54838 -0.013096715 0.4228918

56.55799 -0.040533021 0.4425243

56.56809 -0.069427148 0.4632241

56.57875 -0.099871323 0.485041

56.58995 -0.1319288 0.508088

56.60175 -0.1657117 0.5324066

56.6142 -0.2013217 0.5580685

56.62729 -0.2388471 0.5851839

56.64111 -0.2784181 0.6138031

56.65564 -0.3201262 0.6440632

56.67097 -0.3641224 0.6760094

56.68711 -0.4105024 0.7098007

56.70414 -0.4594362 0.7454858

56.72206 -0.511031 0.7832414

56.74097 -0.5654719 0.8231273

56.76087 -0.6228809 0.8653324

56.78188 -0.6834595 0.9099356

56.80397 -0.7473546 0.9571324

56.82726 -0.8147752 1.007031

56.85179 -0.8859076 1.059801

56.87758 -0.9609304 1.115659

56.90478 -1.04009 1.174714

56.93342 -1.123596 1.237178

56.96351 -1.211662 1.303297

56.99521 -1.304567 1.373205

57.02856 -1.402555 1.447148

57.06361 -1.505893 1.525355

57.10041 -1.61484 1.608121

57.13912 -1.729732 1.695619

57.17977 -1.850857 1.788145

57.22246 -1.978536 1.885978

57.26727 -2.113098 1.989407

57.31425 -2.254894 2.09874

57.36349 -2.404284 2.214296

57.41501 -2.56164 2.336448

57.46896 -2.727365 2.465469

57.52539 -2.901864 2.601746

57.58438 -3.085547 2.745652

57.64604 -3.27886 2.897532

57.71034 -3.482226 3.057869

57.77739 -3.696121 3.227031

57.84725 -3.921012 3.405443

57.91992 -4.15739 3.593541

57.99544 -4.405761 3.791776

58.07383 -4.666624 4.000602

58.15519 -4.940506 4.22044

58.23938 -5.227912 4.45186

58.32641 -5.529395 4.69529

58.41626 -5.845493 4.951215

58.50897 -6.176746 5.220091

58.60424 -6.523692 5.502482

58.70216 -6.886868 5.798818

58.80263 -7.266819 6.109562

58.90528 -7.664072 6.435234

59.01032 -8.079087 6.776256

59.11704 -8.512151 7.133493

59.22556 -8.963562 7.507486

59.33581 -9.433705 7.89865

59.44762 -9.92291 8.307458

59.56063 -10.43146 8.734383

59.67455 -10.95958 9.179873

59.78905 -11.50746 9.644317

59.90378 -12.07524 10.12806

60.01835 -12.66297 10.63143

60.13238 -13.27061 11.15472

60.24545 -13.89809 11.69815

60.35709 -14.54521 12.26189

60.46687 -15.21172 12.84603

60.57433 -15.89729 13.4506

60.67904 -16.60147 14.07556

60.78049 -17.3237 14.72079

60.87822 -18.06334 15.38612

60.97181 -18.81966 16.07123

61.06078 -19.59182 16.77576

61.14473 -20.37889 17.49924

61.22396 -21.18007 18.24076

61.29657 -21.99376 19.00039

61.36298 -22.819 19.777

61.42294 -23.65453 20.56973

61.47619 -24.49897 21.37762

61.52254 -25.35091 22.19965

61.56177 -26.20889 23.03467

61.59381 -27.07142 23.88148

61.61858 -27.93691 24.73882

61.6361 -28.8038 25.60533

61.64642 -29.67055 26.47958

61.6496 -30.53556 27.36009

61.64583 -31.39727 28.2454

61.63534 -32.25414 29.13393

61.61833 -33.10471 30.02416

61.59447 -33.94718 30.91476

61.56382 -34.78028 31.80406

61.52792 -35.60376 32.68944

61.48791 -36.41705 33.56871

61.44204 -37.21819 34.44108

61.39118 -38.00644 35.30463

61.33504 -38.78056 36.15817

61.27367 -39.53946 37.00047

61.20845 -40.28259 37.83019

61.14008 -41.00923 38.64608

61.06811 -41.7184 39.44739

60.99364 -42.40973 40.23298

60.91718 -43.08257 41.00219

60.83929 -43.73642 41.75437

60.76022 -44.37055 42.48919

60.68086 -44.98499 43.2059

60.6014 -45.57924 43.90428

60.52242 -46.15334 44.5839

60.44436 -46.70715 45.24454

60.36744 -47.24057 45.88617

60.29216 -47.75393 46.50844

60.21862 -48.24728 47.11135

60.14714 -48.72071 47.69511

60.07789 -49.17474 48.25951

60.01108 -49.6095 48.80487

59.94684 -50.02558 49.33115

59.88522 -50.4232 49.83876

59.82639 -50.80301 50.32773

59.77023 -51.16531 50.79855

59.71692 -51.51077 51.25135

59.66635 -51.83973 51.68663

59.61853 -52.15287 52.10466

59.57344 -52.45079 52.50575

59.53099 -52.73386 52.89051

59.4911 -53.00272 53.25925

59.45376 -53.25794 53.6124

59.41883 -53.50008 53.95041

59.38611 -53.72976 54.27365

59.3557 -53.94732 54.58281

59.32741 -54.15342 54.87818

59.30111 -54.34858 55.16023

59.2767 -54.5333 55.42943

59.25419 -54.70795 55.68639

59.2333 -54.87322 55.93132

59.21402 -55.02947 56.16479

59.19624 -55.17717 56.38721

59.17986 -55.31678 56.59905

59.16486 -55.44852 56.80082

59.15102 -55.57304 56.99276

59.1383 -55.69069 57.17535

59.12673 -55.80161 57.3491

59.11607 -55.90644 57.51424

59.10626 -56.00544 57.67113

59.09745 -56.09867 57.8204

59.08924 -56.18687 57.96203

59.0819 -56.26988 58.09674

59.07505 -56.34844 58.22447

59.06899 -56.42232 58.34592

59.06342 -56.49212 58.46116

59.05829 -56.55808 58.57047

59.0537 -56.62018 58.67429

59.0494 -56.67898 58.77264

59.04567 -56.73425 58.86613

59.04224 -56.78643 58.95477

59.03899 -56.83589 59.03872

59.03624 -56.88232 59.11852

59.03372 -56.92618 59.19417

59.03143 -56.96762 59.2659

59.02935 -57.00681 59.33388

59.02765 -57.04359 59.39851

59.02619 -57.0783 59.45984

59.02496 -57.11103 59.51803

59.02335 -57.14239 59.57283

59.02244 -57.1715 59.62516

59.0216 -57.19902 59.67476

59.02079 -57.22505 59.72172

59.01997 -57.24972 59.76618

59.01911 -57.27314 59.80821

59.01732 -57.29609 59.84739

59.01582 -57.31747 59.88455

59.01393 -57.33799 59.91942

59.01166 -57.35775 59.95208

59.00891 -57.37683 59.98262

59.00571 -57.3953 60.0111

59.002 -57.4132 60.03759

58.99774 -57.43063 60.06216

59.01888 -57.4444 60.0854

59.00697 -57.4594 60.1072

58.99525 -57.475 60.1263

58.98372 -57.4896 60.1416

58.9724 -57.5066 60.157

58.96134 -57.524 60.1706

58.95047 -57.54238 60.1826

58.93987 -57.5579 60.19191

58.92952 -57.57275 60.20044

58.91945 -57.5869 60.20822

58.90966 -57.60042 60.21532

58.90012 -57.61333 60.22181

58.89086 -57.62566 60.22771

58.88187 -57.63745 60.23311

58.87314 -57.64872 60.23804

58.86467 -57.65951 60.24254

58.85646 -57.66982 60.24664

58.8485 -57.67971 60.2504

58.84079 -57.68918 60.25381

58.8333 -57.69826 60.25694

58.82604 -57.70697 60.2598

58.81901 -57.71533 60.26241

58.81221 -57.72336 60.2648

58.80559 -57.73107 60.26698

58.79918 -57.73849 60.26898

58.79296 -57.74563 60.27081

58.78691 -57.75252 60.27247

58.78104 -57.75915 60.27399

58.77534 -57.76555 60.27539

58.76981 -57.77173 60.27667

58.76442 -57.77769 60.27784

# section 3

XYZ

240

65.92666 -0.6472106 -0.3310836

65.92673 -0.6387447 -0.329928

65.92679 -0.6301065 -0.3282018

65.92685 -0.6213217 -0.3258428

65.92693 -0.6124368 -0.3228059

65.92701 -0.6035413 -0.3188376

65.9271 -0.5949196 -0.31354

65.92728 -0.5864475 -0.3073927

65.92772 -0.5783498 -0.3001943

65.92896 -0.5708995 -0.2919515

65.93196 -0.564644 -0.2826701

65.93652 -0.560052 -0.2723203

65.94143 -0.5570344 -0.2610227

65.94654 -0.5556496 -0.2489701

65.95176 -0.5559251 -0.2363249

65.95699 -0.5578806 -0.2232341

65.96214 -0.5616007 -0.2098259

65.96717 -0.5671419 -0.1962201

65.97192 -0.5750499 -0.1828942

65.97605 -0.5865523 -0.1709545

65.97984 -0.6005193 -0.1598304

65.98377 -0.6152521 -0.1482657

65.98792 -0.6309358 -0.1363639

65.99223 -0.6474914 -0.1239779

65.99677 -0.664791 -0.1109113

66.00152 -0.6832368 -0.097456634

66.00648 -0.7026081 -0.083321437

66.01171 -0.7229642 -0.068471171

66.01721 -0.7443543 -0.052848518

66.02297 -0.7668438 -0.036415953

66.02906 -0.7904978 -0.019124044

66.03545 -0.8153906 -0.00093027751

66.04215 -0.8415847 0.018235192

66.04922 -0.8691657 0.038413629

66.05666 -0.8982064 0.059684556

66.06446 -0.9287974 0.082100309

66.0727 -0.961032 0.1057226

66.08137 -0.994998 0.1306417

66.09048 -1.0308 0.1569217

66.10009 -1.06855 0.1846386

66.11016 -1.108352 0.2138914

66.12082 -1.150333 0.2447537

66.13199 -1.194611 0.2773387

66.1438 -1.241326 0.3117268

66.1562 -1.29061 0.3480466

66.16927 -1.342617 0.3863861

66.18303 -1.397496 0.4268878

66.19756 -1.455416 0.469652

66.2128 -1.516544 0.5148323

66.22889 -1.581068 0.5625471

66.24578 -1.649171 0.6129641

66.2636 -1.721065 0.6662192

66.28231 -1.796953 0.7224801

66.30196 -1.877056 0.781934

66.32269 -1.961617 0.8447326

66.34444 -2.050874 0.9110757

66.36727 -2.14508 0.9811831

66.3913 -2.244513 1.055234

66.41655 -2.349453 1.133457

66.44307 -2.460196 1.216081

66.47085 -2.577051 1.303368

66.49999 -2.700347 1.395537

66.53054 -2.830421 1.492867

66.56255 -2.967622 1.595632

66.59602 -3.112316 1.704124

66.63107 -3.264895 1.81864

66.66772 -3.425758 1.939496

66.70592 -3.595313 2.067045

66.74582 -3.774015 2.201568

66.7874 -3.962288 2.343458

66.83071 -4.160602 2.493072

66.87584 -4.369434 2.650768

66.92265 -4.589275 2.816974

66.97123 -4.820634 2.992077

67.02157 -5.064028 3.176492

67.07368 -5.319998 3.370646

67.12752 -5.589094 3.574981

67.18304 -5.871864 3.789942

67.24036 -6.16888 4.015966

67.29913 -6.480702 4.253567

67.35939 -6.807918 4.503194

67.42107 -7.151115 4.765322

67.48412 -7.510869 5.04042

67.54818 -7.887755 5.329016

67.61326 -8.282348 5.631565

67.67918 -8.69521 5.94854

67.74556 -9.126894 6.280448

67.81254 -9.57791 6.627737

67.8792 -10.04859 6.99116

67.94564 -10.5393 7.371258

68.01172 -11.05044 7.768476

68.07717 -11.58235 8.183287

68.1416 -12.13532 8.616147

68.20465 -12.70962 9.067495

68.26586 -13.30541 9.537712

68.32484 -13.92282 10.02715

68.38113 -14.5619 10.53612

68.43425 -15.2226 11.06491

68.48373 -15.9048 11.61375

68.52908 -16.60829 12.1828

68.56976 -17.33276 12.77215

68.60529 -18.0778 13.38185

68.63515 -18.84293 14.01184

68.65883 -19.62749 14.66202

68.67583 -20.43077 15.33221

68.68568 -21.25194 16.0221

68.68796 -22.09007 16.73134

68.68217 -22.9441 17.45946

68.66878 -23.81321 18.20556

68.64568 -24.69549 18.96968

68.61346 -25.58996 19.75071

68.57189 -26.49521 20.54779

68.52076 -27.40972 21.35996

68.46 -28.33195 22.18619

68.38947 -29.26031 23.02532

68.30922 -30.19314 23.87615

68.21927 -31.12874 24.7374

68.11977 -32.06538 25.60771

68.01096 -33.0014 26.48564

67.89303 -33.93506 27.3697

67.76637 -34.86469 28.25841

67.63135 -35.78858 29.15017

67.48833 -36.70516 30.04347

67.33705 -37.6123 30.93702

67.17793 -38.50857 31.82929

67.01328 -39.39379 32.71781

66.84482 -40.26743 33.60051

66.67097 -41.12659 34.47715

66.49326 -41.97023 35.34637

66.31176 -42.7964 36.20758

66.12674 -43.60303 37.06033

65.93975 -44.39027 37.90258

65.75178 -45.15792 38.73259

65.56254 -45.90472 39.54964

65.37325 -46.63084 40.35217

65.18452 -47.33589 41.13916

64.99687 -48.01945 41.90981

64.8106 -48.68089 42.66363

64.62669 -49.32069 43.39955

64.44531 -49.93834 44.11729

64.26713 -50.53418 44.8162

64.09249 -51.10818 45.4959

63.92161 -51.6603 46.15631

63.75507 -52.19114 46.79697

63.59292 -52.70084 47.4178

63.43543 -53.18954 48.01892

63.28284 -53.65793 48.60007

63.13525 -54.10624 49.16155

62.99283 -54.53512 49.70329

62.85553 -54.94483 50.22565

62.72353 -55.33614 50.72869

62.59668 -55.70937 51.21287

62.47511 -56.06529 51.67833

62.35866 -56.40425 52.12558

62.24731 -56.72697 52.55491

62.14103 -57.03411 52.96666

62.03963 -57.32602 53.36141

61.943 -57.60343 53.73952

61.85109 -57.86693 54.10147

61.76369 -58.11703 54.44769

61.68062 -58.35442 54.77863

61.60181 -58.57943 55.09493

61.52708 -58.79274 55.39698

61.45627 -58.99489 55.68525

61.38921 -59.18638 55.96026

61.3258 -59.36759 56.22258

61.26579 -59.53922 56.47251

61.20908 -59.70164 56.71061

61.15551 -59.85532 56.93734

61.10492 -60.0007 57.15316

61.05718 -60.13805 57.35861

61.01212 -60.26798 57.55398

60.9696 -60.39085 57.73974

60.92956 -60.50685 57.91642

60.89177 -60.61655 58.08428

60.85611 -60.72026 58.2437

60.8226 -60.81807 58.39528

60.79092 -60.91063 58.53908

60.76118 -60.99789 58.67575

60.73304 -61.0805 58.80535

60.70667 -61.15833 58.92849

60.68178 -61.23189 59.04531

60.6583 -61.30145 59.15608

60.63622 -61.36703 59.26125

60.61534 -61.42915 59.36087

60.59579 -61.48763 59.45551

60.57734 -61.54289 59.54524

60.55986 -61.59526 59.6302

60.54353 -61.64454 59.71091

60.52809 -61.69112 59.78741

60.51354 -61.73516 59.85993

60.49977 -61.7769 59.92859

60.48689 -61.81618 59.99379

60.47473 -61.85334 60.0556

60.46327 -61.88847 60.11418

60.45216 -61.92198 60.16946

60.44186 -61.95345 60.22197

60.43204 -61.98328 60.27168

60.42266 -62.01157 60.31871

60.41367 -62.03843 60.36318

60.40504 -62.06393 60.40521

60.39637 -62.08844 60.44471

60.3879 -62.11172 60.48181

60.37947 -62.13399 60.51667

60.37108 -62.15533 60.54935

60.36266 -62.17583 60.57996

60.35418 -62.19553 60.60855

60.3456 -62.21453 60.63519

60.33687 -62.23287 60.65993

60.34719 -62.2484 60.6864

60.33354 -62.2637 60.7073

60.31994 -62.2805 60.7261

60.30645 -62.2971 60.7429

60.29314 -62.3151 60.7577

60.2801 -62.3315 60.7696

60.26731 -62.34786 60.78049

60.25482 -62.3634 60.7895

60.24266 -62.37831 60.7976

60.23085 -62.39258 60.8049

60.2194 -62.40624 60.8115

60.2083 -62.41932 60.81746

60.19753 -62.43183 60.82284

60.18713 -62.44382 60.82772

60.17706 -62.45528 60.83214

60.16732 -62.46627 60.83615

60.15791 -62.47678 60.83979

60.14882 -62.48685 60.8431

60.14003 -62.49652 60.8461

60.13154 -62.50578 60.84883

60.12332 -62.51467 60.85131

60.11539 -62.5232 60.85357

60.10772 -62.53141 60.85563

60.1003 -62.53929 60.85751

60.09311 -62.54687 60.85921

60.08616 -62.55417 60.86077

60.07942 -62.5612 60.86218

60.07289 -62.56798 60.86347

60.06656 -62.57452 60.86465

60.06042 -62.58084 60.86572

60.05446 -62.58694 60.8667

# section 4

XYZ

240

77.6241 -1.708256 -0.8496326

77.62429 -1.69932 -0.8480826

77.62448 -1.690226 -0.8459182

77.62468 -1.681016 -0.8430524

77.62489 -1.671757 -0.8394117

77.6251 -1.662568 -0.8347169

77.6253 -1.653805 -0.82852

77.62553 -1.645268 -0.8213869

77.62593 -1.63715 -0.8131345

77.62683 -1.629589 -0.8038252

77.62901 -1.622826 -0.7935328

77.63225 -1.617023 -0.7822754

77.63573 -1.612116 -0.77011

77.63938 -1.608251 -0.7570677

77.64311 -1.605576 -0.7431756

77.64687 -1.604226 -0.7284977

77.65054 -1.604475 -0.7131037

77.65415 -1.606601 -0.6970986

77.65752 -1.611667 -0.6810645

77.66035 -1.621936 -0.6666625

77.66285 -1.635724 -0.6534044

77.66543 -1.650463 -0.6397889

77.66813 -1.666621 -0.6261831

77.67091 -1.683882 -0.612209

77.67387 -1.70178 -0.5973405

77.67692 -1.721422 -0.5825378

77.6801 -1.742053 -0.5669922

77.68345 -1.763731 -0.5506573

77.68699 -1.786525 -0.5334941

77.69069 -1.810498 -0.5154491

77.69459 -1.835713 -0.4964637

77.69868 -1.86226 -0.476503

77.70299 -1.890208 -0.4554943

77.70753 -1.919633 -0.4333728

77.7123 -1.950643 -0.4100916

77.71729 -1.983316 -0.3855701

77.72257 -2.017748 -0.3597327

77.7281 -2.054055 -0.3325164

77.7339 -2.092336 -0.3038296

77.74004 -2.132711 -0.2735906

77.74643 -2.175307 -0.2417154

77.7532 -2.220245 -0.2081009

77.76025 -2.267676 -0.1726627

77.76772 -2.317728 -0.135278

77.77554 -2.370574 -0.09585575

77.78378 -2.426353 -0.054259229

77.79243 -2.485261 -0.010387857

77.80154 -2.547452 0.035908356

77.81107 -2.613142 0.084739774

77.82114 -2.682508 0.1362727

77.83167 -2.755776 0.1906406

77.84274 -2.833157 0.2480151

77.85434 -2.914881 0.3085597

77.86644 -3.001218 0.3724259

77.87922 -3.092408 0.4398175

77.89254 -3.188719 0.5109211

77.90644 -3.29046 0.5859228

77.92109 -3.397905 0.6650555

77.9364 -3.511375 0.7485321

77.95245 -3.631207 0.8365766

77.96912 -3.757763 0.9294102

77.98656 -3.891372 1.027312

78.00469 -4.032427 1.130535

78.02359 -4.181312 1.239354

78.04318 -4.338439 1.354058

78.06358 -4.50425 1.474934

78.08477 -4.679191 1.602292

78.10664 -4.863715 1.736465

78.12927 -5.058342 1.877739

78.15262 -5.263515 2.026518

78.17673 -5.479782 2.183134

78.20156 -5.707658 2.347967

78.22692 -5.947717 2.521376

78.25284 -6.200507 2.703768

78.27923 -6.466604 2.895549

78.30609 -6.746614 3.097135

78.33331 -7.041141 3.308954

78.36079 -7.350794 3.531444

78.38857 -7.676195 3.765059

78.41619 -8.01798 4.010244

78.4436 -8.376771 4.267474

78.47069 -8.753221 4.537213

78.49738 -9.147947 4.819946

78.52312 -9.561574 5.116157

78.5479 -9.994716 5.42633

78.57145 -10.44796 5.750952

78.59329 -10.9219 6.090513

78.61357 -11.41709 6.445492

78.63108 -11.93393 6.816507

78.6459 -12.47286 7.204094

78.65778 -13.0343 7.608741

78.66634 -13.61861 8.030917

78.67113 -14.2261 8.471063

78.67177 -14.85706 8.929597

78.66762 -15.51163 9.406898

78.6582 -16.18995 9.903314

78.64294 -16.89204 10.41916

78.62132 -17.61785 10.95471

78.59278 -18.3672 11.51018

78.55677 -19.13985 12.08574

78.51268 -19.93544 12.68149

78.45993 -20.75347 13.29748

78.39794 -21.59337 13.93365

78.32619 -22.45443 14.5899

78.24413 -23.3358 15.26605

78.15127 -24.23655 15.96182

78.04712 -25.15563 16.67684

77.93124 -26.09183 17.41064

77.80419 -27.04428 18.16237

77.66365 -28.01074 18.932

77.51038 -28.99016 19.71845

77.34423 -29.98096 20.52087

77.16502 -30.98145 21.33829

76.97282 -31.98995 22.16966

76.76762 -33.00466 23.01384

76.54956 -34.02375 23.8696

76.31884 -35.04536 24.73565

76.07576 -36.06761 25.61062

75.82076 -37.08863 26.49306

75.55424 -38.10653 27.38149

75.27676 -39.11948 28.27436

74.98895 -40.12564 29.1701

74.69129 -41.12319 30.06716

74.38366 -42.10971 30.96433

74.06689 -43.08347 31.86024

73.74426 -44.04447 32.75261

73.41818 -44.99215 33.63953

73.08725 -45.92252 34.52141

72.75391 -46.83413 35.39758

72.41859 -47.72415 36.26821

72.08184 -48.58935 37.13378

71.74544 -49.43071 37.99141

71.41072 -50.2487 38.83874

71.07756 -51.04168 39.67511

70.74741 -51.8105 40.49841

70.42091 -52.55506 41.30722

70.09856 -53.27508 42.10055

69.78075 -53.97002 42.87769

69.46854 -54.64094 43.63717

69.16212 -55.2873 44.37867

68.86218 -55.90982 45.10123

68.56904 -56.50859 45.80434

68.28288 -57.08367 46.4878

68.00432 -57.63596 47.15101

67.73346 -58.16571 47.79381

67.47043 -58.67314 48.41624

67.21558 -59.15918 49.01796

66.96886 -59.62409 49.59922

66.7305 -60.06868 50.15991

66.50033 -60.49324 50.70038

66.27856 -60.89867 51.2207

66.06493 -61.28529 51.72126

65.85962 -61.65407 52.20226

65.66234 -62.00528 52.6642

65.47305 -62.33975 53.1074

65.29166 -62.6582 53.53222

65.11792 -62.96098 53.93924

64.95169 -63.24888 54.32886

64.7928 -63.52252 54.70158

64.64103 -63.78242 55.0579

64.49615 -64.02924 55.39827

64.35797 -64.26342 55.72335

64.22626 -64.48557 56.03357

64.10082 -64.69629 56.32948

63.98142 -64.8961 56.61162

63.86783 -65.08535 56.88052

63.75982 -65.26479 57.13658

63.65718 -65.43478 57.38037

63.55968 -65.59579 57.61237

63.46711 -65.74826 57.83309

63.37921 -65.89249 58.04305

63.29584 -66.02905 58.24262

63.21677 -66.15834 58.43229

63.14177 -66.28054 58.61256

63.07069 -66.39624 58.78375

63.00333 -66.50573 58.94629

62.93951 -66.60914 59.10069

62.87903 -66.70705 59.24715

62.82178 -66.79954 59.38623

62.76753 -66.88711 59.51812

62.71622 -66.96977 59.64334

62.66763 -67.04796 59.76208

62.62162 -67.12196 59.87466

62.57808 -67.1918 59.98148

62.53687 -67.258 60.08268

62.4979 -67.32041 60.17873

62.46101 -67.37945 60.26979

62.42608 -67.4354 60.35599

62.39308 -67.48817 60.43781

62.3618 -67.53808 60.51537

62.33221 -67.58532 60.58885

62.30409 -67.63019 60.65833

62.27748 -67.67254 60.72424

62.2522 -67.71271 60.78664

62.2282 -67.75079 60.84568

62.20541 -67.78691 60.90157

62.1836 -67.8213 60.95431

62.16275 -67.85395 61.00415

62.14286 -67.88502 61.05125

62.12384 -67.91454 61.09574

62.10567 -67.94263 61.13777

62.08856 -67.96904 61.17765

62.07154 -67.99466 61.2147

62.05509 -68.01907 61.24953

62.03921 -68.04235 61.28225

62.0238 -68.06458 61.31293

62.00886 -68.08581 61.34166

61.9943 -68.10616 61.36848

61.98008 -68.12562 61.39345

61.97712 -68.14088 61.42913

61.96133 -68.15908 61.44877

61.94543 -68.17702 61.46573

61.92952 -68.19463 61.48041

61.91379 -68.2118 61.49319

61.89832 -68.22848 61.50436

61.88317 -68.24458 61.51415

61.86837 -68.26013 61.52275

61.85398 -68.27512 61.53035

61.84005 -68.28954 61.53708

61.82657 -68.30338 61.54306

61.81353 -68.31667 61.54837

61.80093 -68.3294 61.55311

61.78878 -68.34161 61.55735

61.77707 -68.35332 61.56115

61.76577 -68.36455 61.56456

61.75489 -68.37527 61.56762

61.74441 -68.38561 61.57038

61.7343 -68.39552 61.57287

61.72457 -68.40498 61.5751

61.71519 -68.41411 61.57713

61.70614 -68.42285 61.57896

61.69741 -68.43127 61.58062

61.689 -68.43937 61.58211

61.68087 -68.44713 61.58347

61.67301 -68.45463 61.58469

61.66542 -68.46185 61.58579

61.65808 -68.4688 61.5868

61.65097 -68.47552 61.5877

61.64409 -68.48201 61.58852

61.63743 -68.48827 61.58926

# section 5

XYZ

240

90.22175 -2.069101 -1.115859

90.22197 -2.059491 -1.11401

90.2222 -2.049732 -1.111479

90.22242 -2.039873 -1.108161

90.22268 -2.030006 -1.103964

90.22292 -2.020284 -1.09857

90.22313 -2.011168 -1.091463

90.22333 -2.002455 -1.083277

90.22353 -1.994434 -1.073796

90.22399 -1.987347 -1.063068

90.22515 -1.981546 -1.051197

90.22684 -1.977207 -1.038432

90.22869 -1.974166 -1.025038

90.23065 -1.972494 -1.011138

90.23267 -1.972329 -0.9968656

90.23468 -1.973746 -0.9823227

90.23663 -1.976847 -0.9674478

90.23862 -1.981739 -0.9521064

90.24043 -1.989326 -0.9365984

90.24186 -2.001675 -0.9223142

90.24303 -2.017318 -0.9089048

90.24421 -2.034004 -0.8951379

90.24545 -2.052204 -0.8813888

90.2467 -2.071608 -0.8672715

90.24805 -2.091755 -0.852248

90.24943 -2.113761 -0.837303

90.25083 -2.136877 -0.8216079

90.25232 -2.161165 -0.8051161

90.25391 -2.186703 -0.7877874

90.25555 -2.21356 -0.7695679

90.25727 -2.241811 -0.7504027

90.25909 -2.271551 -0.7302458

90.26101 -2.302859 -0.7090333

90.26302 -2.335824 -0.6866977

90.26514 -2.37056 -0.66319

90.26733 -2.407159 -0.6384296

90.26967 -2.445729 -0.6123404

90.27208 -2.486396 -0.5848562

90.27459 -2.529276 -0.5558877

90.27725 -2.574497 -0.5253503

90.27996 -2.622205 -0.4931599

90.28285 -2.672535 -0.4592125

90.2858 -2.725656 -0.4234224

90.28893 -2.781713 -0.3856667

90.29216 -2.840891 -0.3458497

90.29558 -2.903355 -0.303837

90.29911 -2.969312 -0.2595219

90.30283 -3.038948 -0.2127573

90.30664 -3.112492 -0.1634255

90.31065 -3.190148 -0.1113634

90.31479 -3.272165 -0.05643291

90.31912 -3.358779 0.001537445

90.32356 -3.450253 0.062712803

90.32809 -3.546877 0.1272529

90.33288 -3.648919 0.1953621

90.3377 -3.756687 0.2672284

90.34264 -3.870513 0.3430431

90.34782 -3.990706 0.4230399

90.35313 -4.117625 0.5074358

90.3586 -4.251637 0.5964631

90.36409 -4.393141 0.6903506

90.36968 -4.542515 0.7893718

90.37532 -4.700187 0.8937859

90.38093 -4.866589 1.003875

90.38647 -5.042175 1.119932

90.39202 -5.227425 1.242255

90.39752 -5.422832 1.371161

90.40283 -5.628897 1.506993

90.40797 -5.846184 1.650042

90.41279 -6.0752 1.800715

90.41734 -6.316534 1.959353

90.42152 -6.570761 2.126344

90.42504 -6.838497 2.302066

90.42784 -7.120349 2.486933

90.4298 -7.416948 2.681361

90.43088 -7.728947 2.885782

90.43092 -8.057005 3.100637

90.42971 -8.401785 3.326377

90.42726 -8.763968 3.563468

90.42295 -9.144225 3.812382

90.41666 -9.543236 4.073605

90.40829 -9.961689 4.34763

90.39763 -10.40026 4.634953

90.384 -10.8596 4.93609

90.36736 -11.34036 5.251541

90.34729 -11.84318 5.581829

90.32327 -12.36863 5.92748

90.29543 -12.91735 6.288977

90.26225 -13.48971 6.666965

90.22381 -14.08622 7.061945

90.17971 -14.70737 7.47437

90.12949 -15.35356 7.904667

90.07264 -16.02515 8.353234

90.00868 -16.72242 8.820481

89.93681 -17.44553 9.306769

89.85647 -18.19459 9.812426

89.767 -18.96961 10.33774

89.66779 -19.77052 10.88295

89.55817 -20.59712 11.44825

89.43757 -21.44912 12.03376

89.30527 -22.3261 12.63955

89.16055 -23.2275 13.2656

89.00282 -24.15266 13.91184

88.83147 -25.10079 14.57809

88.64597 -26.07096 15.26412

88.44572 -27.06211 15.96958

88.23027 -28.07307 16.69403

87.99907 -29.10249 17.43696

87.75291 -30.14944 18.19748

87.48914 -31.21138 18.97538

87.20876 -32.28714 19.7696

86.91164 -33.37498 20.5792

86.59767 -34.47302 21.40314

86.26702 -35.57939 22.24033

85.91985 -36.6921 23.08957

85.55636 -37.80911 23.94958

85.17695 -38.92834 24.81901

84.7821 -40.04771 25.69646

84.37244 -41.16515 26.58046

83.94859 -42.27854 27.46948

83.51134 -43.38586 28.36198

83.06155 -44.48505 29.25635

82.59991 -45.57405 30.15107

82.12634 -46.6501 31.04485

81.64209 -47.71129 31.93639

81.15142 -48.75779 32.82372

80.65746 -49.78913 33.70514

80.15858 -50.80074 34.58105

79.65785 -51.79115 35.45106

79.15569 -52.75714 36.31553

78.65244 -53.69484 37.17527

78.15053 -54.60545 38.02746

77.65188 -55.48972 38.86962

77.15643 -56.34573 39.70115

76.66611 -57.17459 40.51991

76.18185 -57.97627 41.32444

75.70426 -58.75041 42.1138

75.23389 -59.49651 42.88726

74.77213 -60.21586 43.64331

74.31926 -60.90792 44.38161

73.87621 -61.57363 45.10116

73.44331 -62.21303 45.80149

73.02084 -62.8263 46.48235

72.60963 -63.41453 47.14312

72.2098 -63.97806 47.78362

71.82146 -64.51716 48.40389

71.44518 -65.03297 49.00356

71.08074 -65.52578 49.58287

70.72853 -65.99655 50.14172

70.38827 -66.44559 50.68045

70.06022 -66.87399 51.1991

69.74406 -67.2821 51.69808

69.43996 -67.67103 52.17755

69.14754 -68.04109 52.63802

68.86673 -68.39323 53.07981

68.59743 -68.72826 53.50326

68.33922 -69.04655 53.90897

68.09196 -69.34901 54.29733

67.85537 -69.6363 54.66883

67.6292 -69.90906 55.02396

67.4131 -70.16798 55.3632

67.20673 -70.4135 55.68717

67.00984 -70.6463 55.99636

66.82213 -70.86704 56.29124

66.64325 -71.07629 56.57239

66.47286 -71.27444 56.84034

66.31068 -71.46223 57.09549

66.1564 -71.64012 57.3384

66.00969 -71.80858 57.56958

65.87023 -71.96806 57.78948

65.73766 -72.1189 57.99868

65.61178 -72.26171 58.19752

65.49226 -72.39691 58.38648

65.37876 -72.52468 58.56608

65.2711 -72.64564 58.73663

65.16895 -72.76011 58.89855

65.07207 -72.86823 59.05238

64.9802 -72.9706 59.19829

64.89311 -73.06729 59.33686

64.81056 -73.15885 59.46824

64.73234 -73.24529 59.59299

64.65821 -73.32705 59.7113

64.588 -73.40442 59.82346

64.52145 -73.47747 59.92989

64.45844 -73.54669 60.03072

64.39877 -73.61198 60.12642

64.34224 -73.67374 60.21715

64.28872 -73.73227 60.30304

64.23805 -73.78748 60.38457

64.19002 -73.83971 60.46185

64.14455 -73.88917 60.53509

64.1014 -73.93613 60.60432

64.0605 -73.98043 60.67001

64.02169 -74.02248 60.7322

63.98484 -74.06232 60.79105

63.94995 -74.10011 60.84678

63.91663 -74.13607 60.89939

63.8849 -74.1702 60.94913

63.8547 -74.20263 60.99616

63.82594 -74.23347 61.0406

63.79859 -74.26276 61.08263

63.77286 -74.29028 61.12258

63.74776 -74.31689 61.15979

63.72373 -74.34219 61.19487

63.70075 -74.36628 61.22792

63.67874 -74.38922 61.25901

63.65765 -74.41106 61.28822

63.63738 -74.43192 61.31563

63.61787 -74.45181 61.34128

63.60542 -74.46951 61.37387

63.58629 -74.48747 61.39533

63.56732 -74.50512 61.41413

63.54858 -74.52245 61.43065

63.53024 -74.53934 61.44522

63.51232 -74.55579 61.45811

63.49488 -74.57167 61.46955

63.47791 -74.58704 61.47969

63.46149 -74.60188 61.48872

63.44564 -74.61619 61.49678

63.43032 -74.62994 61.50399

63.41555 -74.64317 61.51041

63.40128 -74.65589 61.51619

63.38755 -74.66811 61.52136

63.37432 -74.67984 61.526

63.36158 -74.69113 61.53017

63.34931 -74.70194 61.53391

63.33751 -74.71235 61.53727

63.32614 -74.72237 61.54031

63.31518 -74.73196 61.54302

63.30463 -74.74122 61.54545

63.29445 -74.75011 61.54766

63.28464 -74.75867 61.54963

63.27518 -74.76692 61.5514

63.26605 -74.77486 61.55298

63.25722 -74.78254 61.55441

63.2487 -74.78993 61.55568

63.24046 -74.79705 61.55682

63.23249 -74.80396 61.55783

63.22477 -74.81063 61.55873

63.21729 -74.81709 61.55953

# section 6

XYZ

240

101.9561 -1.664808 -1.087105

101.9562 -1.654411 -1.085095

101.9564 -1.643864 -1.08232

101.9566 -1.633222 -1.078671

101.9568 -1.622594 -1.074042

101.9569 -1.612168 -1.068076

101.957 -1.602509 -1.060169

101.9571 -1.593478 -1.050991

101.957 -1.585577 -1.040245

101.957 -1.579443 -1.027921

101.957 -1.576085 -1.01416

101.9572 -1.575968 -0.9995765

101.9574 -1.57861 -0.9848568

101.9577 -1.583846 -0.9704531

101.958 -1.591641 -0.9568301

101.9582 -1.601832 -0.9442388

101.9585 -1.613992 -0.9324265

101.9589 -1.627701 -0.920829

101.9592 -1.643008 -0.9091021

101.9593 -1.660562 -0.8975633

101.9593 -1.679888 -0.8860492

101.9593 -1.700247 -0.8740944

101.9592 -1.721847 -0.8618298

101.9592 -1.744617 -0.8490837

101.9591 -1.768432 -0.835624

101.9591 -1.793745 -0.8218151

101.959 -1.82033 -0.8073075

101.9589 -1.848264 -0.7920657

101.9588 -1.877622 -0.7760301

101.9587 -1.90849 -0.7591628

101.9586 -1.940963 -0.7414226

101.9585 -1.975126 -0.7227365

101.9583 -2.011083 -0.7030619

101.9582 -2.048944 -0.6823463

101.958 -2.088812 -0.6605083

101.9578 -2.130808 -0.6374919

101.9576 -2.17506 -0.6132361

101.9574 -2.221689 -0.5876411

101.9571 -2.270842 -0.5606461

101.9568 -2.322666 -0.5321725

101.9563 -2.377308 -0.5021164

101.9559 -2.434942 -0.4704049

101.9553 -2.49573 -0.4369181

101.9548 -2.559865 -0.4015765

101.9541 -2.627524 -0.3642412

101.9533 -2.698923 -0.3248265

101.9524 -2.774261 -0.2831784

101.9515 -2.853776 -0.2391983

101.9504 -2.937688 -0.1927151

101.9492 -3.026261 -0.1436187

101.9478 -3.119742 -0.091729254

101.9463 -3.218417 -0.036909405

101.9446 -3.322572 0.021015055

101.9426 -3.432494 0.082253791

101.9404 -3.548519 0.1469563

101.9379 -3.670974 0.2153339

101.9351 -3.8002 0.2876178

101.9321 -3.936582 0.3639845

101.9287 -4.080496 0.4446817

101.925 -4.23234 0.5299568

101.9207 -4.392515 0.6200983

101.916 -4.561486 0.7153106

101.9107 -4.739699 0.8158909

101.9047 -4.927628 0.9221321

101.898 -5.125764 1.034345

101.8906 -5.334625 1.152851

101.8824 -5.554744 1.277985

101.8731 -5.786642 1.410142

101.8629 -6.030941 1.549601

101.8515 -6.288207 1.696778

101.8388 -6.559058 1.85205

101.8248 -6.844136 2.0158

101.809 -7.144038 2.188513

101.7914 -7.459442 2.370594

101.7718 -7.791022 2.562493

101.75 -8.139473 2.764675

101.726 -8.505497 2.97762

101.6993 -8.889796 3.201814

101.67 -9.293118 3.437725

101.6374 -9.716103 3.685942

101.6011 -10.1595 3.94695

101.5611 -10.62403 4.221301

101.5171 -11.11042 4.5095

101.4684 -11.6193 4.812157

101.4147 -12.15139 5.129771

101.3556 -12.70733 5.462914

101.2905 -13.2877 5.812201

101.2195 -13.89322 6.178071

101.1408 -14.52411 6.561361

101.0545 -15.18099 6.962495

100.9601 -15.86444 7.381818

100.8569 -16.57489 7.819684

100.7445 -17.31278 8.276427

100.6223 -18.07839 8.752439

100.4893 -18.87185 9.248065

100.3448 -19.69327 9.76358

100.1881 -20.54267 10.29922

100.0186 -21.41993 10.85518

99.83539 -22.32484 11.4316

99.63793 -23.25709 12.02852

99.42538 -24.21618 12.64592

99.19698 -25.20153 13.2837

98.95197 -26.21239 13.94168

98.68974 -27.24789 14.61961

98.40971 -28.30703 15.31712

98.11129 -29.38867 16.03378

97.7939 -30.49148 16.76903

97.457 -31.61403 17.52221

97.10155 -32.75528 18.29245

96.72459 -33.91245 19.07924

96.32731 -35.08426 19.8815

95.90958 -36.26879 20.6982

95.47141 -37.46399 21.5282

95.01303 -38.6678 22.37033

94.53474 -39.87802 23.22332

94.03686 -41.09241 24.08583

93.51989 -42.30866 24.95647

92.98453 -43.52448 25.8338

92.43156 -44.73759 26.71632

91.86186 -45.94565 27.60249

91.27641 -47.14641 28.49078

90.67626 -48.33759 29.37959

90.06235 -49.51688 30.26743

89.43459 -50.68124 31.15289

88.79462 -51.82865 32.03467

88.14756 -52.95943 32.91117

87.4972 -54.07327 33.78096

86.84147 -55.16532 34.64399

86.18384 -56.23444 35.49984

85.5245 -57.27731 36.34872

84.8634 -58.28972 37.19144

84.20372 -59.27274 38.02574

83.54812 -60.22712 38.84941

82.89652 -61.15067 39.66193

82.25155 -62.04455 40.46142

81.61443 -62.90858 41.24667

80.98597 -63.74231 42.01686

80.36694 -64.54516 42.77135

79.75919 -65.31853 43.50879

79.16305 -66.06184 44.22886

78.57983 -66.77612 44.93066

78.0099 -67.46138 45.6138

77.4537 -68.11784 46.27807

76.91228 -68.74676 46.92286

76.38582 -69.34855 47.54799

75.87449 -69.92347 48.15356

75.379 -70.47292 48.73917

74.89912 -70.99717 49.30509

74.43531 -71.49734 49.85118

73.98722 -71.97377 50.37783

73.55519 -72.4277 50.88501

73.13882 -72.85959 51.37317

72.7383 -73.27067 51.8424

72.35316 -73.66129 52.2932

71.98329 -74.03255 52.72588

71.62856 -74.38532 53.14076

71.28843 -74.72008 53.53841

70.9627 -75.03782 53.9192

70.65102 -75.33926 54.28361

70.35302 -75.62512 54.63209

70.0683 -75.89623 54.96508

69.79636 -76.15299 55.28323

69.5369 -76.39619 55.58698

69.28951 -76.62658 55.87679

69.05374 -76.84478 56.15316

68.82914 -77.05119 56.41668

68.61534 -77.24667 56.6677

68.41196 -77.43167 56.90675

68.21851 -77.60674 57.13432

68.03462 -77.77236 57.35088

67.8598 -77.92885 57.55698

67.69379 -78.07695 57.75291

67.53614 -78.21705 57.93916

67.38642 -78.34936 58.11625

67.24438 -78.47455 58.28445

67.10964 -78.59295 58.44418

66.9818 -78.7047 58.596

66.86057 -78.81049 58.74002

66.74564 -78.91033 58.87685

66.63669 -79.00486 59.00661

66.53343 -79.09403 59.12986

66.43559 -79.17834 59.24678

66.3429 -79.2581 59.35762

66.25504 -79.33339 59.46286

66.17184 -79.4047 59.56254

66.09304 -79.47192 59.65721

66.01837 -79.53551 59.74696

65.94768 -79.59577 59.83194

65.88074 -79.65257 59.91263

65.81731 -79.7063 59.98914

65.75724 -79.75714 60.06166

65.70034 -79.80536 60.13027

65.64642 -79.85083 60.19543

65.59532 -79.89388 60.25717

65.54689 -79.93464 60.31566

65.501 -79.97338 60.37098

65.45744 -80.00996 60.42346

65.41608 -80.04465 60.47314

65.37684 -80.07756 60.52019

65.33958 -80.10876 60.56472

65.30422 -80.13838 60.6069

65.27073 -80.16646 60.64681

65.23869 -80.19321 60.68443

65.20816 -80.21863 60.71999

65.17909 -80.24282 60.75357

65.15139 -80.26581 60.78526

65.12498 -80.28771 60.81517

65.09978 -80.30859 60.84335

65.07567 -80.3285 60.86986

65.05692 -80.34545 60.90119

65.03411 -80.36379 60.92374

65.01197 -80.38162 60.94422

64.99046 -80.3989 60.96279

64.96967 -80.41565 60.97963

64.94954 -80.43187 60.99491

64.93009 -80.44751 61.00876

64.91129 -80.46262 61.02131

64.89315 -80.47721 61.03268

64.87569 -80.49127 61.04296

64.85885 -80.50481 61.05228

64.84263 -80.51787 61.0607

64.827 -80.53044 61.06832

64.81193 -80.54255 61.0752

64.79744 -80.55421 61.08141

64.78348 -80.56544 61.08704

64.77002 -80.57623 61.09209

64.75706 -80.58665 61.09665

64.7446 -80.59668 61.10077

64.73257 -80.60633 61.10445

64.72098 -80.61567 61.10777

64.70979 -80.62464 61.11076

64.699 -80.63331 61.11343

64.68859 -80.64168 61.11583

64.67854 -80.64975 61.11797

64.66882 -80.65757 61.11988

64.65942 -80.66512 61.12157

64.65034 -80.67239 61.12308

64.64155 -80.67947 61.12441

64.63303 -80.68632 61.12558

64.62477 -80.69294 61.12661

# section 7

XYZ

240

111.5189 -1.335334 -1.063672

111.519 -1.324297 -1.061531

111.5191 -1.313106 -1.058558

111.5192 -1.301825 -1.054638

111.5193 -1.290578 -1.049658

111.5194 -1.279577 -1.043226

111.5195 -1.269476 -1.034667

111.5194 -1.260187 -1.02468

111.5192 -1.252382 -1.012904

111.5187 -1.247027 -0.9992794

111.5178 -1.245658 -0.9839764

111.5167 -1.248981 -0.9679122

111.5156 -1.256256 -0.9521119

111.5145 -1.267121 -0.9372977

111.5134 -1.281402 -0.9242037

111.5123 -1.298744 -0.9132028

111.5112 -1.318287 -0.9038863

111.5102 -1.339181 -0.8953399

111.5092 -1.360779 -0.8866945

111.5083 -1.382576 -0.8773927

111.5073 -1.404904 -0.8674232

111.5063 -1.428254 -0.8569453

111.5053 -1.452626 -0.8458905

111.5041 -1.478139 -0.8342619

111.503 -1.504944 -0.8220766

111.5017 -1.532951 -0.8091934

111.5004 -1.562363 -0.7956536

111.499 -1.593269 -0.7814306

111.4976 -1.625739 -0.7664487

111.496 -1.659876 -0.7506832

111.4944 -1.695789 -0.7341046

111.4927 -1.733557 -0.716617

111.4909 -1.773304 -0.6981956

111.489 -1.815154 -0.6788002

111.487 -1.859204 -0.6583229

111.4849 -1.905598 -0.6367278

111.4826 -1.954482 -0.613966

111.4802 -2.00597 -0.5899106

111.4776 -2.060234 -0.5645241

111.4749 -2.117439 -0.5377321

111.4719 -2.177732 -0.5094157

111.4688 -2.241318 -0.4795262

111.4653 -2.308355 -0.4479163

111.4617 -2.379072 -0.414542

111.4578 -2.453643 -0.3792292

111.4537 -2.532324 -0.3419318

111.4492 -2.615306 -0.302457

111.4445 -2.702873 -0.2607462

111.4394 -2.795234 -0.2165844

111.434 -2.892703 -0.1699049

111.4281 -2.995527 -0.1204937

111.4218 -3.104031 -0.068241276

111.4151 -3.218519 -0.012966125

111.4078 -3.339278 0.045582283

111.3999 -3.466699 0.1075085

111.3915 -3.601124 0.173043

111.3823 -3.742899 0.2424496

111.3726 -3.892474 0.315858

111.3621 -4.050239 0.3935409

111.3509 -4.216615 0.4757583

111.3387 -4.392005 0.562847

111.3256 -4.576947 0.6549552

111.3114 -4.7719 0.7524112

111.296 -4.977372 0.8555167

111.2793 -5.193884 0.9645978

111.2612 -5.421988 1.079992

111.2418 -5.662245 1.202053

111.2207 -5.915197 1.331214

111.198 -6.181509 1.467748

111.1733 -6.461795 1.612075

111.1466 -6.756701 1.764605

111.1178 -7.066919 1.925714

111.0863 -7.393036 2.095975

111.0521 -7.735783 2.275785

111.0149 -8.095871 2.465623

110.9745 -8.474028 2.665981

110.9308 -8.870992 2.877369

110.8834 -9.287498 3.100302

110.8322 -9.724342 3.335253

110.7764 -10.18215 3.582902

110.7157 -10.66172 3.843734

110.65 -11.1638 4.118352

110.5789 -11.68916 4.407264

110.5015 -12.23841 4.71116

110.4176 -12.81233 5.030536

110.3267 -13.41156 5.366008

110.2281 -14.03669 5.718256

110.1219 -14.68849 6.087692

110.0062 -15.36709 6.475302

109.8809 -16.07317 6.88145

109.7455 -16.80738 7.306396

109.5992 -17.57021 7.750429

109.4415 -18.36213 8.213834

109.2717 -19.18343 8.696992

109.0889 -20.03421 9.200225

108.8921 -20.91461 9.723777

108.6807 -21.82461 10.26784

108.4538 -22.76411 10.83256

108.2107 -23.73284 11.41803

107.9506 -24.73048 12.02425

107.6727 -25.7565 12.65111

107.3761 -26.81025 13.29845

107.0599 -27.89095 13.96601

106.7237 -28.99765 14.65344

106.3666 -30.1293 15.36032

105.9882 -31.28468 16.0861

105.5877 -32.46235 16.83014

105.1647 -33.66079 17.59169

104.7202 -34.87889 18.36985

104.2509 -36.11366 19.16389

103.7584 -37.36375 19.9727

103.2424 -38.62708 20.79518

102.703 -39.90146 21.63011

102.1405 -41.18467 22.47627

101.5554 -42.47435 23.33232

100.948 -43.7681 24.19687

100.3189 -45.06341 25.06849

99.66903 -46.35785 25.94572

98.99929 -47.64891 26.82704

98.31071 -48.93412 27.71089

97.60449 -50.21104 28.59574

96.88184 -51.47718 29.48003

96.14381 -52.73005 30.36226

95.3904 -53.96638 31.24095

94.62353 -55.18406 32.11477

93.84901 -56.38353 32.98244

93.07119 -57.56458 33.84275

92.28763 -58.72219 34.69528

91.50214 -59.85546 35.53961

90.71471 -60.96097 36.37577

89.92497 -62.03429 37.20462

89.13673 -63.07629 38.02434

88.35321 -64.0878 38.83295

87.57438 -65.0664 39.62999

86.80336 -66.01328 40.41376

86.04166 -66.92814 41.18329

85.29027 -67.81042 41.93786

84.55008 -68.65951 42.67688

83.82335 -69.47691 43.39917

83.11047 -70.26197 44.10439

82.413 -71.01585 44.79171

81.73141 -71.73847 45.46085

81.06622 -72.43014 46.11161

80.41869 -73.09222 46.74335

79.78905 -73.72518 47.35598

79.17747 -74.3293 47.94957

78.58484 -74.90616 48.52371

78.01089 -75.45603 49.07872

77.45612 -75.98016 49.61442

76.92017 -76.4789 50.13122

76.40339 -76.95366 50.62906

75.90536 -77.40491 51.10839

75.42627 -77.83404 51.56927

74.96558 -78.24142 52.0122

74.52313 -78.62825 52.43746

74.09877 -78.99551 52.84534

73.69187 -79.34367 53.23643

73.30219 -79.67384 53.61106

72.92932 -79.98683 53.96968

72.57278 -80.28339 54.31274

72.23212 -80.56442 54.64064

71.90676 -80.83033 54.95405

71.5963 -81.08201 55.25337

71.30027 -81.32027 55.53903

71.01816 -81.54575 55.81153

70.74937 -81.7589 56.07143

70.49352 -81.96065 56.31908

70.25011 -82.15146 56.55498

70.01859 -82.3319 56.77962

69.79849 -82.50253 56.99346

69.58924 -82.66363 57.19703

69.39051 -82.81603 57.39058

69.20178 -82.96012 57.57463

69.02255 -83.09612 57.74966

68.85252 -83.22475 57.91595

68.69118 -83.34638 58.0739

68.53811 -83.46108 58.22409

68.39298 -83.56967 58.36657

68.25536 -83.67207 58.50199

68.12489 -83.76901 58.63041

68.00124 -83.86041 58.75245

67.88405 -83.9468 58.86823

67.77306 -84.02852 58.978

67.66781 -84.10561 59.08226

67.56816 -84.17863 59.18101

67.47377 -84.24745 59.27485

67.38432 -84.31252 59.36378

67.29964 -84.37418 59.44802

67.21945 -84.43227 59.52804

67.14346 -84.48723 59.60391

67.0715 -84.53921 59.67585

67.00339 -84.58844 59.74395

66.93887 -84.63486 59.80869

66.87775 -84.67873 59.87006

66.81987 -84.72024 59.92825

66.76501 -84.75974 59.98325

66.71312 -84.79686 60.03561

66.66392 -84.832 60.08525

66.6173 -84.86528 60.13231

66.5731 -84.89679 60.17692

66.53124 -84.92669 60.21921

66.49141 -84.95522 60.25911

66.45372 -84.98208 60.29706

66.41789 -85.00759 60.33298

66.38386 -85.03186 60.36702

66.35152 -85.0549 60.3992

66.32079 -85.07684 60.42966

66.29155 -85.09775 60.45846

66.2637 -85.11766 60.48569

66.2398 -85.134 60.516

66.214 -85.15266 60.53944

66.18928 -85.17061 60.56127

66.1655 -85.18787 60.58152

66.14272 -85.20449 60.60022

66.1208 -85.22053 60.61744

66.09971 -85.23598 60.63326

66.07941 -85.25089 60.64777

66.05988 -85.26527 60.66103

66.04109 -85.27913 60.67314

66.02302 -85.29251 60.68417

66.00562 -85.30541 60.6942

65.98887 -85.31786 60.70334

65.97272 -85.32988 60.71162

65.9572 -85.34147 60.71911

65.94224 -85.35265 60.72591

65.92783 -85.36344 60.73203

65.91393 -85.37386 60.73757

65.90057 -85.3839 60.74258

65.88766 -85.39362 60.74706

65.87523 -85.40299 60.75109

65.86321 -85.41206 60.75472

65.85163 -85.4208 60.75797

65.84045 -85.42927 60.76088

65.82964 -85.43745 60.76346

65.81919 -85.44537 60.76577

65.80909 -85.45304 60.76781

65.79932 -85.46046 60.76961

65.78985 -85.46767 60.7712

65.78068 -85.47466 60.7726

65.77178 -85.48142 60.77382

# section 8

XYZ

240

118.5829 -1.09196 -1.046361

118.583 -1.080443 -1.044124

118.5826 -1.06878 -1.041002

118.5832 -1.057027 -1.036889

118.5828 -1.045324 -1.031647

118.583 -1.033897 -1.024866

118.583 -1.023471 -1.015826

118.5828 -1.013991 -1.005243

118.5827 -1.006252 -0.9927059

118.5817 -1.001474 -0.9781231

118.5802 -1.001576 -0.9616792

118.578 -1.007445 -0.9445215

118.5762 -1.018142 -0.9279251

118.5742 -1.033158 -0.9128047

118.5718 -1.052235 -0.9001042

118.5697 -1.074857 -0.8902755

118.5675 -1.099853 -0.8828046

118.5653 -1.126059 -0.8765112

118.5637 -1.152302 -0.870144

118.5622 -1.177229 -0.8624917

118.5603 -1.201776 -0.8536635

118.5585 -1.227344 -0.8442788

118.5565 -1.253761 -0.8341165

118.5547 -1.281296 -0.8233142

118.5529 -1.310314 -0.8120695

118.5508 -1.340303 -0.7998686

118.5483 -1.371807 -0.7870459

118.5464 -1.404905 -0.7735751

118.5437 -1.43968 -0.7593718

118.541 -1.476232 -0.7444199

118.5383 -1.514683 -0.7286987

118.5356 -1.555115 -0.712095

118.5325 -1.597664 -0.6946005

118.529 -1.642461 -0.6761804

118.5259 -1.6896 -0.6567089

118.522 -1.739241 -0.6361635

118.5187 -1.791544 -0.6145042

118.5146 -1.846625 -0.591586

118.5102 -1.90467 -0.5673888

118.5059 -1.965844 -0.5418391

118.5007 -2.030304 -0.5148082

118.4958 -2.098298 -0.4862638

118.4901 -2.169951 -0.4560404

118.4845 -2.245514 -0.4241187

118.4781 -2.325196 -0.3903012

118.4715 -2.40926 -0.3545677

118.4645 -2.497896 -0.3166979

118.4569 -2.591397 -0.2766623

118.4486 -2.690003 -0.234216

118.4404 -2.794047 -0.1893224

118.4312 -2.903765 -0.1417416

118.4209 -3.019532 -0.09138529

118.4109 -3.141663 -0.038067531

118.3996 -3.270418 0.018493777

118.3873 -3.406255 0.078369066

118.3744 -3.54953 0.1418035

118.3608 -3.700577 0.2090842

118.3461 -3.859896 0.2803076

118.3304 -4.027882 0.355765

118.3136 -4.204998 0.435723

118.2954 -4.391623 0.5205567

118.2761 -4.588356 0.610373

118.2556 -4.795692 0.7055203

118.2331 -5.014112 0.8063074

118.2091 -5.244201 0.9130746

118.1831 -5.486511 1.026169

118.1553 -5.74164 1.145964

118.1257 -6.010158 1.272912

118.0937 -6.292742 1.407284

118.0592 -6.59003 1.549506

118.022 -6.902682 1.700013

117.9826 -7.231481 1.85917

117.9393 -7.576975 2.027622

117.8927 -7.939914 2.205753

117.8426 -8.321063 2.394068

117.7884 -8.721136 2.593078

117.73 -9.140972 2.803314

117.6677 -9.581278 3.025317

117.6003 -10.0429 3.259552

117.5275 -10.52639 3.506783

117.4485 -11.03269 3.76749

117.3636 -11.56254 4.042316

117.2725 -12.11667 4.331752

117.1741 -12.69573 4.63656

117.0681 -13.30058 4.95723

116.9535 -13.93173 5.294419

116.8303 -14.58995 5.648869

116.698 -15.27598 6.02093

116.5547 -15.98978 6.411726

116.4009 -16.73225 6.821581

116.2352 -17.50395 7.25069

116.057 -18.30543 7.699272

115.8658 -19.13725 8.167581

115.6612 -19.99969 8.656049

115.4414 -20.89287 9.164885

115.206 -21.8168 9.694383

114.9537 -22.77158 10.24467

114.6849 -23.757 10.81584

114.3974 -24.77288 11.40802

114.0909 -25.8188 12.0211

113.765 -26.89426 12.65495

113.4179 -27.99865 13.30936

113.0491 -29.13085 13.98399

112.658 -30.29018 14.67842

112.2443 -31.4753 15.39223

111.8067 -32.68527 16.12474

111.3445 -33.91819 16.87534

110.8582 -35.17264 17.64305

110.3478 -36.44761 18.42696

109.8107 -37.73972 19.22644

109.2477 -39.04752 20.04004

108.659 -40.36907 20.86683

108.045 -41.70193 21.70541

107.4054 -43.04391 22.55451

106.7412 -44.3921 23.4128

106.0532 -45.74464 24.27889

105.3412 -47.09839 25.15121

104.6068 -48.45078 26.02843

103.8509 -49.79956 26.90878

103.0745 -51.14162 27.79095

102.2792 -52.47483 28.67328

101.4659 -53.7964 29.55421

100.6359 -55.10347 30.43226

99.78974 -56.39305 31.30602

98.92931 -57.66276 32.17385

98.06074 -58.91293 33.03507

97.18874 -60.14347 33.88838

96.31072 -61.34959 34.73309

95.43064 -62.53017 35.569

94.54849 -63.68204 36.39567

93.66357 -64.80016 37.2144

92.7807 -65.88585 38.02324

91.90253 -66.93958 38.82066

91.02981 -67.95912 39.60646

90.16576 -68.94466 40.37851

89.31218 -69.89748 41.13654

88.46957 -70.81555 41.87962

87.63992 -71.69889 42.60717

86.82533 -72.54879 43.31825

86.02614 -73.36457 44.01255

85.24464 -74.1476 44.68899

84.48032 -74.89777 45.34778

83.73497 -75.61565 45.98871

83.00896 -76.30224 46.61069

82.30272 -76.95817 47.21407

81.61727 -77.58366 47.79895

80.95294 -78.1807 48.36446

80.3096 -78.74963 48.91158

79.68761 -79.29159 49.43948

79.0867 -79.80659 49.94901

78.50727 -80.29699 50.44009

77.94882 -80.76234 50.91273

77.41196 -81.20483 51.36746

76.89533 -81.62455 51.80453

76.39917 -82.02309 52.22443

75.92334 -82.40104 52.62703

75.46715 -82.75922 53.01334

75.03038 -83.09835 53.38348

74.61221 -83.4198 53.73788

74.21255 -83.72421 54.07678

73.8305 -84.01258 54.40101

73.46587 -84.28515 54.71082

73.11742 -84.5435 55.00702

72.78555 -84.78738 55.28961

72.46925 -85.01839 55.55906

72.16799 -85.23663 55.81642

71.88084 -85.44287 56.06155

71.60775 -85.63808 56.2952

71.34824 -85.82251 56.51761

71.10123 -85.99641 56.72949

70.86679 -86.161 56.93111

70.64397 -86.31673 57.12297

70.43225 -86.46354 57.30535

70.23122 -86.60239 57.47896

70.04049 -86.73381 57.64385

69.85954 -86.85766 57.80041

69.68795 -86.97456 57.94947

69.52494 -87.08534 58.0906

69.37052 -87.18943 58.22515

69.22437 -87.28815 58.35247

69.08557 -87.3811 58.47366

68.9539 -87.46922 58.58859

68.82945 -87.55258 58.69753

68.71135 -87.63086 58.8012

68.5994 -87.70497 58.89915

68.49377 -87.77496 58.9924

68.39315 -87.84107 59.08079

68.29836 -87.90388 59.16447

68.20814 -87.96304 59.24393

68.12315 -88.01868 59.31926

68.04227 -88.07174 59.39088

67.96577 -88.12153 59.45869

67.89339 -88.16898 59.52291

67.825 -88.21344 59.58401

67.76033 -88.25543 59.64217

67.69876 -88.29548 59.69689

67.64074 -88.33275 59.749

67.58589 -88.36837 59.79864

67.5337 -88.40168 59.8457

67.48447 -88.43377 59.89055

67.4376 -88.46366 59.93286

67.39326 -88.4927 59.97276

67.35113 -88.51952 60.01098

67.31139 -88.5451 60.04718

67.27395 -88.5694 60.0815

67.23824 -88.59248 60.11398

67.20419 -88.6144 60.14497

67.1721 -88.63527 60.17409

67.14147 -88.65524 60.20186

67.11364 -88.67139 60.23136

67.0856 -88.69008 60.25561

67.05874 -88.7082 60.2783

67.03328 -88.7254 60.29992

67.00931 -88.74199 60.32001

66.98578 -88.75803 60.33864

66.96353 -88.77294 60.35587

66.94211 -88.7878 60.37179

66.92194 -88.80217 60.38645

66.90208 -88.81608 60.39994

66.88292 -88.82895 60.41236

66.86491 -88.84184 60.42352

66.8471 -88.85431 60.43377

66.83034 -88.86625 60.44293

66.81375 -88.87781 60.45151

66.79819 -88.88898 60.45916

66.7832 -88.89978 60.46611

66.76874 -88.91024 60.47223

66.75431 -88.92021 60.47805

66.74085 -88.92999 60.48309

66.72783 -88.93935 60.48769

66.71524 -88.94839 60.49162

66.70309 -88.95715 60.49541

66.69135 -88.96564 60.49861

66.67999 -88.97385 60.50149

66.66899 -88.98228 60.50431

66.65835 -88.99001 60.50639

66.64803 -88.99749 60.50846

66.63799 -89.00464 60.51032

66.62827 -89.01158 60.51198

66.61884 -89.01843 60.51323

pressure

SECTIONAL

8

# section 1

XYZ

240

49.35203 0.8562099 0.4036607

49.35206 0.8482367 0.4040463

49.35232 0.8400534 0.4049502

49.35233 0.831671 0.4064146

49.35245 0.8231755 0.4085935

49.35295 0.8146009 0.4115928

49.35393 0.8061264 0.4157245

49.35485 0.7973746 0.4200328

49.35659 0.7885924 0.4250123

49.35864 0.7795075 0.4302069

49.36075 0.7699938 0.4355736

49.36346 0.7602729 0.4412359

49.36665 0.7501671 0.4471236

49.36982 0.7396501 0.4532549

49.37344 0.7286926 0.4596446

49.37688 0.7171916 0.4663486

49.3811 0.7052895 0.4732979

49.38569 0.6928499 0.4805652

49.39046 0.6798352 0.4881738

49.39518 0.6662123 0.4961412

49.40014 0.6519491 0.5044803

49.40574 0.6370065 0.5132427

49.41136 0.6213415 0.5224309

49.41718 0.6049153 0.5320777

49.42307 0.5876729 0.5421923

49.42942 0.5695899 0.5528491

49.43653 0.5506009 0.5640522

49.44345 0.5306544 0.5758332

49.45095 0.5096847 0.588215

49.45878 0.4876545 0.6012765

49.46716 0.4644881 0.6150329

49.4757 0.4401076 0.6294956

49.48488 0.4144711 0.6447807

49.49446 0.3874874 0.6608922

49.50472 0.3590655 0.6778547

49.51522 0.3291584 0.6957942

49.52665 0.2976568 0.7147199

49.53839 0.26445 0.7346694

49.55088 0.2294925 0.7557849

49.56396 0.1926427 0.7780778

49.57747 0.1537891 0.8016034

49.59225 0.112846 0.8265092

49.6075 0.069655746 0.85279

49.62368 0.024139913 0.8806236

49.64064 -0.023892945 0.9100127

49.65861 -0.074513957 0.9411469

49.67742 -0.1279267 0.9740623

49.69759 -0.1842596 1.008887

49.71821 -0.2437038 1.045706

49.74023 -0.3063895 1.084747

49.76378 -0.3725405 1.126001

49.78834 -0.4423128 1.169721

49.81404 -0.5159351 1.215955

49.84136 -0.5935904 1.264945

49.8697 -0.6755126 1.316777

49.89979 -0.761961 1.371648

49.93143 -0.8531232 1.429776

49.96475 -0.9493073 1.491281

49.99976 -1.05074 1.556401

50.03677 -1.157733 1.625333

50.07533 -1.270544 1.698369

50.11604 -1.389495 1.77562

50.15869 -1.514894 1.857384

50.20359 -1.647111 1.943922

50.25056 -1.78651 2.035498

50.29964 -1.93338 2.132349

50.35142 -2.08812 2.234843

50.40516 -2.251133 2.343261

50.46168 -2.422804 2.457839

50.52058 -2.603611 2.578988

50.58253 -2.793966 2.707033

50.64694 -2.994335 2.842305

50.71432 -3.205177 2.985135

50.78413 -3.426939 3.135993

50.85713 -3.660156 3.295212

50.9326 -3.905309 3.463233

51.0113 -4.162979 3.640376

51.09273 -4.433658 3.827144

51.17742 -4.717891 4.023899

51.26477 -5.016205 4.231189

51.35514 -5.32919 4.449318

51.44796 -5.657361 4.678823

51.54353 -6.00136 4.920152

51.64209 -6.361681 5.173745

51.7427 -6.738933 5.440033

51.84603 -7.133702 5.719444

51.95171 -7.546399 6.012489

52.05897 -7.977521 6.319789

52.16813 -8.427225 6.642308

52.27954 -8.89597 6.980131

52.39185 -9.384159 7.334146

52.50588 -9.891845 7.704731

52.62088 -10.41956 8.092438

52.73647 -10.96738 8.497705

52.85272 -11.53527 8.921187

52.96885 -12.1235 9.363195

53.08491 -12.73195 9.824354

53.2002 -13.36057 10.3049

53.31429 -14.00902 10.80534

53.42701 -14.67698 11.32599

53.5382 -15.3641 11.86725

53.64676 -16.06985 12.42929

53.75296 -16.79359 13.01231

53.85669 -17.53466 13.61652

53.95681 -18.29206 14.24199

54.05328 -19.0648 14.88858

54.14627 -19.85188 15.55648

54.23531 -20.65229 16.24538

54.32019 -21.46443 16.95472

54.40075 -22.28723 17.68462

54.47644 -23.11897 18.43424

54.54899 -23.95888 19.20243

54.61593 -24.80422 19.99016

54.67842 -25.65392 20.79571

54.73692 -26.50625 21.61785

54.7909 -27.35979 22.45599

54.84155 -28.21272 23.3085

54.88802 -29.06344 24.1743

54.93157 -29.91051 25.05214

54.97156 -30.75201 25.94042

55.00904 -31.5863 26.83766

55.04356 -32.41238 27.74199

55.07589 -33.22823 28.65281

55.10573 -34.03203 29.56805

55.13363 -34.82539 30.48374

55.15996 -35.6076 31.39685

55.18409 -36.37816 32.30584

55.20527 -37.13345 33.2109

55.22277 -37.87467 34.10818

55.23787 -38.60173 34.99482

55.25088 -39.31432 35.87014

55.2622 -40.01039 36.73336

55.27206 -40.68999 37.58325

55.28053 -41.35165 38.41908

55.28892 -41.99499 39.23931

55.29652 -42.62046 40.04371

55.3041 -43.22567 40.83162

55.31166 -43.81225 41.6021

55.31984 -44.37959 42.3545

55.3284 -44.92727 43.08804

55.33788 -45.45525 43.80292

55.34834 -45.96371 44.4978

55.35931 -46.45285 45.17315

55.37168 -46.92297 45.82836

55.38525 -47.37366 46.46368

55.39986 -47.80583 47.07878

55.41565 -48.22018 47.67371

55.43263 -48.61591 48.24861

55.45069 -48.99433 48.80337

55.46976 -49.35566 49.33849

55.48998 -49.70038 49.8541

55.51125 -50.02869 50.35001

55.53318 -50.34106 50.82759

55.5561 -50.63894 51.28615

55.57965 -50.92193 51.72647

55.60367 -51.1911 52.14897

55.62874 -51.44597 52.55389

55.65402 -51.68822 52.94175

55.67949 -51.91769 53.31349

55.70563 -52.13568 53.66906

55.73158 -52.34158 54.00889

55.75778 -52.53644 54.33366

55.78397 -52.72105 54.64384

55.81003 -52.89592 54.93996

55.83647 -53.06056 55.22252

55.86251 -53.21659 55.49248

55.88812 -53.36353 55.74918

55.91344 -53.50257 55.99427

55.93832 -53.63387 56.22756

55.96304 -53.75739 56.44965

55.98732 -53.87409 56.66099

56.01117 -53.98399 56.86237

56.03453 -54.08796 57.05377

56.05731 -54.18534 57.23553

56.07961 -54.27742 57.40854

56.10157 -54.3641 57.57293

56.1225 -54.4459 57.7294

56.1429 -54.52293 57.87768

56.16285 -54.59496 58.01858

56.18308 -54.66288 58.15273

56.20404 -54.72512 58.28038

56.2266 -54.78184 58.40269

56.25508 -54.82935 58.51999

56.30354 -54.85545 58.63657

56.36079 -54.86953 58.74688

56.42463 -54.87317 58.84995

56.49103 -54.86977 58.94466

56.55867 -54.86084 59.02894

56.62363 -54.85003 59.10621

56.68676 -54.83717 59.17526

56.74683 -54.82291 59.23826

56.80479 -54.80763 59.29452

56.8595 -54.79224 59.34691

56.9122 -54.77552 59.39358

56.96207 -54.75913 59.43725

57.00918 -54.74179 59.4765

57.05341 -54.72642 59.51361

57.09725 -54.7075 59.54543

57.13781 -54.68954 59.57494

57.17553 -54.67427 59.6044

57.2131 -54.65555 59.62788

57.24761 -54.63799 59.65003

57.28097 -54.62101 59.67058

57.3121 -54.60471 59.69017

57.3419 -54.58789 59.70702

57.37003 -54.57127 59.72226

57.39634 -54.55554 59.73629

57.42218 -54.54382 59.75507

57.44617 -54.52774 59.765

57.46867 -54.51201 59.77407

57.49025 -54.49656 59.78238

57.51049 -54.48189 59.79024

57.52994 -54.46757 59.79681

57.54837 -54.45397 59.8033

57.56565 -54.4406 59.80862

57.58208 -54.42781 59.81352

57.59788 -54.41569 59.81783

57.61267 -54.40381 59.82185

57.62696 -54.3919 59.82539

57.64031 -54.38092 59.82847

57.65302 -54.37036 59.83114

57.66509 -54.35992 59.83345

57.67682 -54.35015 59.83543

57.68777 -54.3405 59.83709

57.69842 -54.3312 59.83872

57.70813 -54.32252 59.84008

57.71806 -54.31388 59.84121

57.7271 -54.30537 59.84215

57.73573 -54.29759 59.84266

57.74421 -54.28966 59.84302

57.75208 -54.28219 59.84367

57.75986 -54.27504 59.84394

57.76731 -54.26791 59.84409

57.77422 -54.26118 59.84435

57.78106 -54.25468 59.84404

57.78765 -54.24819 59.8441

57.79374 -54.24237 59.84384

57.79984 -54.23652 59.8435

57.80547 -54.23082 59.8431

57.81113 -54.22507 59.84286

# section 2

XYZ

240

56.39392 0.2174792 0.091503277

56.39394 0.2092122 0.092101559

56.39396 0.2007425 0.093246348

56.39396 0.1920866 0.094990626

56.39405 0.1833229 0.09747076

56.39433 0.1744772 0.1007891

56.39502 0.1657184 0.1052195

56.3959 0.1566602 0.1098392

56.39738 0.1475315 0.1151088

56.39914 0.1380864 0.1206105

56.40073 0.1282019 0.1262932

56.40314 0.118069 0.1322944

56.40578 0.1075296 0.1385388

56.40863 0.096555918 0.1450427

56.4117 0.08511886 0.1518241

56.41459 0.073127888 0.1589293

56.41822 0.060694236 0.1663112

56.42201 0.047695573 0.1740317

56.42598 0.034098238 0.1821114

56.43012 0.019867007 0.1905719

56.43447 0.0049633654 0.1994287

56.43903 -0.010649022 0.2087267

56.44378 -0.02701381 0.2184794

56.44877 -0.044176556 0.2287138

56.45402 -0.062189512 0.239448

56.45953 -0.081088021 0.2507429

56.46529 -0.1009335 0.2626134

56.47135 -0.1217831 0.2750935

56.47773 -0.1437004 0.2882085

56.48443 -0.1667331 0.3020312

56.49144 -0.1909575 0.3165815

56.49886 -0.2164505 0.331885

56.50663 -0.2432655 0.3480367

56.51479 -0.2714937 0.3650558

56.52341 -0.3012264 0.3829742

56.53246 -0.3325253 0.4019022

56.54198 -0.3654982 0.421864

56.55202 -0.4002521 0.4429031

56.56259 -0.4368621 0.46514

56.57371 -0.4754553 0.4886092

56.58545 -0.5161507 0.5133726

56.59777 -0.559051 0.5395522

56.61078 -0.6043052 0.5671791

56.62445 -0.6520213 0.5964026

56.63888 -0.7023684 0.6272493

56.65406 -0.7554634 0.6598917

56.67005 -0.8114876 0.6943817

56.68689 -0.8705999 0.7308388

56.70465 -0.932981 0.7693704

56.72331 -0.9987898 0.8101583

56.74298 -1.06825 0.853254

56.76365 -1.141537 0.8988678

56.78543 -1.218888 0.9470811

56.80831 -1.300504 0.9981021

56.83239 -1.38664 1.052051

56.85773 -1.477535 1.109109

56.88433 -1.573437 1.169492

56.91231 -1.674633 1.23334

56.94174 -1.781401 1.300867

56.97262 -1.894039 1.372283

57.00501 -2.012843 1.447849

57.03901 -2.138162 1.527732

57.07466 -2.270328 1.612198

57.11202 -2.409698 1.701501

57.15115 -2.556644 1.795906

57.19209 -2.711546 1.89569

57.23494 -2.874803 2.001145

57.27967 -3.046828 2.112605

57.32642 -3.228066 2.23031

57.37519 -3.418965 2.354627

57.42601 -3.619992 2.485893

57.47892 -3.831627 2.624457

57.53403 -4.054368 2.770647

57.59122 -4.288709 2.924916

57.65052 -4.535184 3.087614

57.71197 -4.794332 3.259138

57.77556 -5.066701 3.439896

57.84127 -5.352849 3.630303

57.90917 -5.653352 3.830754

57.97892 -5.968779 4.04179

58.05057 -6.299712 4.263793

58.12407 -6.646738 4.497212

58.19942 -7.010438 4.742471

58.2762 -7.391398 5.000124

58.35437 -7.790199 5.270575

58.4339 -8.207402 5.554255

58.51444 -8.643539 5.851678

58.59563 -9.099018 6.163517

58.67714 -9.574128 6.490557

58.75946 -10.06932 6.833063

58.84174 -10.58489 7.191804

58.92387 -11.12118 7.567217

59.00556 -11.67843 7.959821

59.08641 -12.25686 8.370113

59.16605 -12.85657 8.798573

59.24407 -13.4776 9.245686

59.32011 -14.11993 9.711899

59.3937 -14.78341 10.19762

59.46439 -15.46783 10.70323

59.53176 -16.17287 11.22907

59.59541 -16.89805 11.77544

59.65492 -17.64285 12.34259

59.70989 -18.40661 12.93071

59.75992 -19.18856 13.53989

59.8046 -19.98782 14.1702

59.84363 -20.80337 14.8216

59.87673 -21.63411 15.49399

59.90365 -22.47878 16.18717

59.92418 -23.33612 16.90081

59.93816 -24.20471 17.63451

59.94547 -25.08304 18.38775

59.94674 -25.9701 19.15929

59.94054 -26.86302 19.94984

59.92773 -27.76075 20.75779

59.90846 -28.66162 21.58216

59.88288 -29.56387 22.42187

59.8513 -30.46578 23.27575

59.81402 -31.36563 24.14252

59.7714 -32.26171 25.02078

59.72373 -33.15232 25.90907

59.67139 -34.03582 26.8059

59.61492 -34.91064 27.70963

59.55433 -35.77468 28.61919

59.48983 -36.62657 29.53277

59.42253 -37.46699 30.44678

59.35318 -38.29593 31.35835

59.28154 -39.11162 32.26631

59.20647 -39.91054 33.17109

59.12902 -40.69317 34.06956

59.04979 -41.4591 34.9598

58.96958 -42.20785 35.84017

58.88854 -42.93777 36.71008

58.80743 -43.64904 37.56755

58.72656 -44.34039 38.41206

58.64656 -45.01196 39.24202

58.56765 -45.66325 40.05651

58.49014 -46.29355 40.85503

58.41453 -46.90335 41.63621

58.34099 -47.49226 42.39956

58.26977 -48.06015 43.14455

58.20115 -48.60741 43.87042

58.13525 -49.13408 44.57675

58.07225 -49.64029 45.26329

58.01212 -50.12638 45.92968

57.95516 -50.59244 46.57592

57.90121 -51.03913 47.20165

57.85038 -51.46674 47.80692

57.80268 -51.87556 48.39189

57.75805 -52.26632 48.95644

57.71638 -52.63942 49.50082

57.67781 -52.99511 50.02539

57.64198 -53.33424 50.5302

57.60903 -53.65718 51.01569

57.57876 -53.96459 51.4821

57.55107 -54.25684 51.92998

57.5258 -54.53473 52.3595

57.50303 -54.79849 52.77139

57.48239 -55.04886 53.16592

57.46386 -55.28638 53.54358

57.44724 -55.5117 53.90478

57.43254 -55.7251 54.25019

57.41959 -55.92723 54.58025

57.40825 -56.11858 54.89545

57.39842 -56.29965 55.1963

57.38993 -56.47092 55.48331

57.3827 -56.63286 55.75698

57.37668 -56.78593 56.01782

57.37173 -56.93055 56.26631

57.36773 -57.06717 56.50296

57.36473 -57.19601 56.72838

57.36242 -57.31775 56.94278

57.36083 -57.43267 57.14673

57.35987 -57.54114 57.34067

57.35967 -57.64326 57.52517

57.35985 -57.73974 57.70042

57.36058 -57.8306 57.86703

57.36163 -57.91639 58.02525

57.36298 -57.9973 58.17547

57.36496 -58.07327 58.31829

57.36736 -58.1448 58.45389

57.37151 -58.21094 58.58316

57.37776 -58.27167 58.70639

57.38894 -58.3247 58.82475

57.41691 -58.35974 58.94107

57.45264 -58.3842 59.05166

57.49495 -58.39899 59.15585

57.54114 -58.40649 59.25306

57.5909 -58.40656 59.34208

57.64016 -58.40382 59.42466

57.69017 -58.39663 59.49994

57.73901 -58.38764 59.56963

57.78749 -58.37571 59.6331

57.83432 -58.3629 59.69197

57.88036 -58.34785 59.74532

57.92435 -58.33285 59.79515

57.96748 -58.31581 59.83981

58.00787 -58.30013 59.88242

58.04831 -58.28151 59.91936

58.08661 -58.26325 59.95362

58.12241 -58.24663 59.98675

58.15799 -58.22765 60.01471

58.19161 -58.20922 60.04072

58.22366 -58.19114 60.06462

58.25393 -58.17429 60.08755

58.2832 -58.15635 60.10695

58.31105 -58.13885 60.12471

58.33757 -58.12185 60.141

58.3621 -58.10972 60.16233

58.38636 -58.09257 60.17445

58.40937 -58.076 60.18544

58.43124 -58.05998 60.19542

58.45201 -58.04452 60.20447

58.47176 -58.02958 60.21266

58.49051 -58.01519 60.22006

58.50834 -58.00129 60.22675

58.5253 -57.98789 60.23276

58.54141 -57.97498 60.23817

58.55676 -57.96255 60.24306

58.57136 -57.95058 60.24746

58.58526 -57.93905 60.25138

58.5985 -57.92793 60.25489

58.61113 -57.91723 60.25805

58.62317 -57.90691 60.26084

58.63465 -57.89698 60.26332

58.64563 -57.88741 60.26555

58.6561 -57.87818 60.26749

58.66611 -57.86928 60.2692

58.67569 -57.86071 60.27071

58.68485 -57.85244 60.27203

58.69363 -57.84444 60.27317

58.70204 -57.83673 60.27416

58.71011 -57.82927 60.27499

58.71786 -57.82207 60.2757

58.7253 -57.81511 60.27628

58.73244 -57.80837 60.27676

58.73932 -57.80184 60.27714

58.74594 -57.79553 60.27742

58.75232 -57.78939 60.27763

58.75848 -57.78345 60.27777

58.76442 -57.77769 60.27784

# section 3

XYZ

240

65.92666 -0.6472106 -0.3310836

65.9266 -0.6558762 -0.330199

65.92651 -0.6647321 -0.3287255

65.92641 -0.6737603 -0.3266036

65.92639 -0.6828889 -0.3237149

65.92651 -0.692098 -0.3199652

65.92697 -0.701246 -0.3151312

65.92757 -0.7107156 -0.3100892

65.92867 -0.720308 -0.3044254

65.92997 -0.7302452 -0.2985097

65.93114 -0.7406315 -0.2923991

65.93297 -0.7513215 -0.2859394

65.93498 -0.762449 -0.2792135

65.93715 -0.774041 -0.2722041

65.93949 -0.7861274 -0.2648924

65.94169 -0.7987799 -0.2572437

65.94448 -0.8119361 -0.2492759

65.94739 -0.8256897 -0.2409435

65.95042 -0.8400757 -0.2322247

65.9536 -0.8551319 -0.2230961

65.95692 -0.8709014 -0.2135394

65.96041 -0.8874184 -0.2035136

65.96405 -0.9047328 -0.1930006

65.96786 -0.9228915 -0.181971

65.97189 -0.9419498 -0.1703997

65.9761 -0.961951 -0.1582401

65.98051 -0.9829571 -0.1454658

65.98514 -1.005028 -0.1320401

65.99002 -1.028228 -0.1179291

65.99513 -1.052619 -0.1030773

66.00049 -1.078274 -0.087449878

66.00615 -1.105272 -0.071009152

66.01208 -1.133683 -0.053684533

66.0183 -1.163597 -0.035437685

66.02486 -1.195103 -0.016222939

66.03175 -1.228286 0.0040422077

66.03899 -1.263251 0.025403092

66.04664 -1.300103 0.04791747

66.05466 -1.338946 0.071675695

66.06311 -1.379901 0.096736304

66.07203 -1.42309 0.1231716

66.08138 -1.468639 0.1510808

66.09124 -1.51669 0.1805278

66.1016 -1.567379 0.2116306

66.11252 -1.620867 0.2444549

66.12398 -1.677305 0.2791336

66.13604 -1.736864 0.3157573

66.14874 -1.799736 0.3544235

66.16212 -1.866094 0.3952668

66.17613 -1.936134 0.4384324

66.19093 -2.010074 0.4840181

66.20643 -2.088122 0.5321973

66.22276 -2.170518 0.5830866

66.23988 -2.257498 0.6368639

66.25788 -2.34932 0.693675

66.27679 -2.446249 0.7536964

66.29658 -2.548562 0.8171265

66.31734 -2.656553 0.8841336

66.33914 -2.77053 0.9549231

66.36197 -2.890817 1.029703

66.38583 -3.017749 1.108709

66.41085 -3.151683 1.192145

66.43703 -3.292986 1.280262

66.46435 -3.44204 1.373315

66.49285 -3.599246 1.471567

66.52258 -3.765019 1.575294

66.55356 -3.939794 1.684781

66.58577 -4.124025 1.800345

66.61931 -4.318178 1.92226

66.65414 -4.522739 2.050872

66.69024 -4.73821 2.186517

66.72757 -4.965104 2.329542

66.76624 -5.203957 2.48029

66.80608 -5.455312 2.639177

66.84711 -5.719738 2.806569

66.8893 -5.997808 2.982863

66.93253 -6.290101 3.16847

66.97678 -6.597214 3.363808

67.02207 -6.919759 3.569283

67.06802 -7.258343 3.785407

67.11465 -7.613578 4.012588

67.16182 -7.986084 4.251283

67.20947 -8.376472 4.501933

67.2571 -8.785338 4.765081

67.30463 -9.213291 5.041162

67.35198 -9.660913 5.330629

67.39871 -10.12875 5.634002

67.44442 -10.61723 5.951924

67.48865 -11.12672 6.285132

67.53182 -11.65769 6.63394

67.57302 -12.21045 6.999098

67.61211 -12.78534 7.381037

67.64868 -13.38265 7.780264

67.68233 -14.00257 8.197274

67.71257 -14.64524 8.63254

67.73892 -15.31067 9.086531

67.76093 -15.99884 9.559681

67.77805 -16.70959 10.05238

67.78981 -17.44271 10.56499

67.79575 -18.19785 11.09783

67.79535 -18.97453 11.65119

67.78812 -19.77218 12.22526

67.7736 -20.59011 12.82022

67.75131 -21.42752 13.43614

67.72085 -22.28345 14.07303

67.68183 -23.15689 14.73083

67.63394 -24.04664 15.40938

67.57688 -24.95144 16.10845

67.51043 -25.86991 16.82767

67.43439 -26.80056 17.56661

67.34868 -27.74184 18.3247

67.254 -28.69269 19.1007

67.14866 -29.65005 19.89518

67.03373 -30.61285 20.70654

66.90936 -31.57931 21.53379

66.77576 -32.54757 22.37583

66.63333 -33.5158 23.23146

66.48235 -34.48212 24.09939

66.32328 -35.44467 24.97828

66.15664 -36.40168 25.86667

65.98306 -37.35147 26.76301

65.80312 -38.29235 27.66562

65.61684 -39.22198 28.57347

65.42464 -40.13868 29.48496

65.22847 -41.04306 30.39674

65.02971 -41.93499 31.30619

64.82832 -42.81222 32.21245

64.62321 -43.67006 33.11691

64.41682 -44.50864 34.01735

64.20999 -45.32697 34.9123

64.00349 -46.12487 35.79951

63.79759 -46.90062 36.67831

63.59341 -47.65498 37.54617

63.39124 -48.38662 38.40245

63.19196 -49.0961 39.24516

62.99581 -49.78278 40.0734

62.8032 -50.44648 40.88612

62.61477 -51.08755 41.68209

62.43075 -51.70587 42.46054

62.25142 -52.3014 43.2208

62.07717 -52.87469 43.96203

61.90815 -53.42584 44.68371

61.74455 -53.95517 45.38543

61.58642 -54.46306 46.06681

61.43401 -54.9497 46.72776

61.28727 -55.4159 47.36786

61.14629 -55.86202 47.98711

61.01103 -56.28839 48.58564

60.88152 -56.69581 49.16333

60.75762 -57.08475 49.7204

60.63935 -57.45556 50.25715

60.5265 -57.80914 50.77364

60.41904 -58.14583 51.27034

60.31684 -58.46643 51.74744

60.21972 -58.77129 52.20551

60.12751 -59.06123 52.64478

60.04018 -59.33665 53.06585

59.95739 -59.59819 53.46912

59.87907 -59.84644 53.85508

59.80499 -60.08207 54.22415

59.73505 -60.30538 54.577

59.66903 -60.51707 54.91406

59.60675 -60.71761 55.23586

59.54806 -60.90755 55.54294

59.49276 -61.08736 55.83582

59.44069 -61.25754 56.11501

59.39172 -61.41856 56.38106

59.34566 -61.57086 56.63444

59.30236 -61.71487 56.87566

59.26174 -61.85085 57.10536

59.22353 -61.97947 57.32379

59.18765 -62.10101 57.53153

59.15396 -62.21584 57.72903

59.12246 -62.32412 57.91685

59.09284 -62.42651 58.09523

59.06509 -62.52308 58.26474

59.03905 -62.61435 58.42569

59.0146 -62.70053 58.57848

58.9919 -62.78163 58.72369

58.97073 -62.85818 58.86147

58.95193 -62.9296 58.99266

58.93566 -62.99602 59.11749

58.92372 -63.05607 59.23695

58.92375 -63.10337 59.35311

58.93049 -63.14192 59.46407

58.94374 -63.17176 59.56984

58.96232 -63.1939 59.6703

58.98806 -63.2064 59.76559

59.01595 -63.21442 59.85534

59.04844 -63.21531 59.93946

59.08179 -63.2131 60.01807

59.11779 -63.2058 60.0909

59.15355 -63.19681 60.15874

59.19092 -63.18384 60.22093

59.22701 -63.17063 60.2791

59.26428 -63.154 60.33163

59.30006 -63.13787 60.38112

59.33559 -63.11964 60.42547

59.37065 -63.10061 60.46603

59.40408 -63.08265 60.50443

59.43681 -63.06324 60.53845

59.46889 -63.04357 60.5693

59.4997 -63.0242 60.59768

59.52864 -63.00625 60.62496

59.55741 -62.98696 60.64806

59.58493 -62.96816 60.66927

59.61126 -62.94991 60.68873

59.63452 -62.93663 60.7137

59.65908 -62.91833 60.72845

59.6825 -62.90067 60.74184

59.70483 -62.8836 60.75399

59.72612 -62.86715 60.76503

59.74643 -62.85128 60.77505

59.76577 -62.83601 60.78416

59.78422 -62.82127 60.79243

59.8018 -62.8071 60.79994

59.81857 -62.79344 60.80676

59.83455 -62.78032 60.81297

59.8498 -62.7677 60.81863

59.86435 -62.75554 60.82374

59.87824 -62.74384 60.8284

59.8915 -62.7326 60.83264

59.90417 -62.72176 60.83648

59.91628 -62.71134 60.83997

59.92786 -62.70132 60.84316

59.93893 -62.69164 60.84603

59.94954 -62.68234 60.84864

59.95969 -62.67337 60.85101

59.96942 -62.66474 60.85317

59.97875 -62.65639 60.85512

59.98771 -62.64835 60.85689

59.9963 -62.64057 60.85848

60.00457 -62.63308 60.85994

60.01251 -62.62582 60.86123

60.02016 -62.61881 60.86241

60.02752 -62.61202 60.86346

60.03461 -62.60546 60.86441

60.04146 -62.59909 60.86525

60.04807 -62.59293 60.86602

60.05446 -62.58694 60.8667

# section 4

XYZ

240

77.6241 -1.708256 -0.8496326

77.62395 -1.717411 -0.8483967

77.62374 -1.726742 -0.84652

77.62351 -1.736226 -0.8439345

77.62335 -1.745802 -0.8405444

77.62328 -1.755458 -0.8362657

77.62346 -1.765084 -0.8309367

77.62372 -1.775058 -0.8253765

77.62434 -1.785219 -0.8192288

77.62508 -1.79576 -0.8128048

77.62573 -1.806761 -0.8061689

77.62684 -1.818136 -0.7991471

77.62807 -1.829984 -0.7918299

77.62942 -1.842335 -0.7842001

77.63086 -1.855219 -0.7762384

77.63222 -1.868683 -0.7679224

77.63396 -1.882726 -0.7592359

77.63579 -1.897406 -0.7501526

77.63769 -1.912759 -0.7406494

77.63968 -1.928828 -0.7307011

77.64175 -1.94566 -0.7202855

77.64393 -1.963287 -0.7093666

77.6462 -1.981767 -0.6979206

77.64857 -2.001147 -0.6859152

77.65109 -2.021489 -0.6733168

77.65372 -2.042843 -0.6600963

77.65646 -2.065273 -0.6462126

77.65933 -2.088842 -0.6316267

77.66238 -2.113617 -0.6162937

77.66554 -2.139674 -0.6001788

77.66886 -2.167086 -0.58323

77.67237 -2.19593 -0.5653936

77.67602 -2.2263 -0.5466298

77.67986 -2.258281 -0.5268764

77.68391 -2.291964 -0.5060709

77.68816 -2.327459 -0.4841653

77.6926 -2.364867 -0.4610873

77.6973 -2.404295 -0.4367627

77.70222 -2.445878 -0.4111379

77.70737 -2.489729 -0.384124

77.71284 -2.535979 -0.3556378

77.71854 -2.584778 -0.3256058

77.72456 -2.636262 -0.2939255

77.73083 -2.690599 -0.2605166

77.73744 -2.747942 -0.2252657

77.74435 -2.808481 -0.1880883

77.7516 -2.872378 -0.1488464

77.75921 -2.939862 -0.1074694

77.7672 -3.0111 -0.063789487

77.77553 -3.086333 -0.017706359

77.78433 -3.16577 0.030934811

77.7935 -3.249661 0.082261853

77.80315 -3.338247 0.1364348

77.81319 -3.431807 0.1935946

77.82372 -3.530608 0.2539178

77.83472 -3.634941 0.3175756

77.84616 -3.745121 0.3847444

77.85809 -3.86145 0.455628

77.87051 -3.984272 0.530421

77.88345 -4.113946 0.6093275

77.89688 -4.250851 0.6925567

77.91087 -4.395356 0.780352

77.92542 -4.547872 0.8729483

77.94041 -4.708808 0.9706028

77.95589 -4.878603 1.073577

77.97184 -5.057718 1.18214

77.98826 -5.246625 1.296577

78.00511 -5.445835 1.417176

78.02245 -5.655835 1.544257

78.04018 -5.877162 1.678138

78.0582 -6.110355 1.819156

78.0764 -6.355971 1.967657

78.09492 -6.614599 2.123997

78.11346 -6.886833 2.28855

78.13206 -7.173283 2.461702

78.15064 -7.474572 2.64385

78.16889 -7.791313 2.835408

78.18679 -8.124152 3.036795

78.20433 -8.473745 3.248436

78.2211 -8.840744 3.470802

78.237 -9.225799 3.704337

78.25186 -9.629574 3.949508

78.26554 -10.05271 4.206771

78.2774 -10.49582 4.476664

78.28733 -10.95954 4.759653

78.2952 -11.44449 5.056219

78.30045 -11.95121 5.366893

78.3026 -12.48021 5.692279

78.30107 -13.03187 6.033059

78.29623 -13.60676 6.389598

78.28703 -14.20514 6.762631

78.27327 -14.82741 7.152577

78.2545 -15.47386 7.559933

78.23022 -16.14471 7.985185

78.19984 -16.84008 8.428802

78.16281 -17.55999 8.891233

78.1185 -18.30441 9.372894

78.06635 -19.07318 9.874157

78.00582 -19.86606 10.39536

77.93635 -20.68267 10.9368

77.85735 -21.52254 11.49871

77.76823 -22.38504 12.08129

77.66842 -23.26945 12.68465

77.55741 -24.17489 13.30882

77.43472 -25.10038 13.9538

77.29995 -26.04485 14.61944

77.15267 -27.00703 15.30556

76.99257 -27.9856 16.01185

76.81937 -28.97907 16.73793

76.63289 -29.98589 17.48329

76.43301 -31.00441 18.24733

76.2206 -32.03352 19.0288

75.9936 -33.06995 19.8281

75.75336 -34.11261 20.64366

75.50003 -35.15956 21.47444

75.23391 -36.20882 22.31933

74.95542 -37.25841 23.17711

74.66494 -38.30629 24.04647

74.36297 -39.35042 24.92612

74.05035 -40.38889 25.81464

73.72797 -41.42004 26.71037

73.39655 -42.442 27.6116

73.05604 -43.45209 28.51738

72.70713 -44.44832 29.42627

72.35282 -45.43119 30.33532

71.99526 -46.40042 31.24217

71.63467 -47.35317 32.14635

71.27001 -48.2833 33.05041

70.90537 -49.19052 33.95328

70.54198 -50.07317 34.85401

70.1805 -50.93139 35.7496

69.82139 -51.76335 36.63932

69.46619 -52.57059 37.51992

69.11519 -53.35166 38.39065

68.76954 -54.10768 39.249

68.42951 -54.83778 40.09411

68.09567 -55.54247 40.92426

67.76881 -56.22191 41.73838

67.44921 -56.87632 42.53536

67.13722 -57.50574 43.31437

66.83335 -58.11098 44.07446

66.5378 -58.69218 44.81495

66.25075 -59.24987 45.5353

65.97237 -59.78452 46.23507

65.70282 -60.2964 46.91407

65.44225 -60.78656 47.57181

65.19064 -61.25539 48.20821

64.94794 -61.70328 48.82336

64.71426 -62.13115 49.41719

64.48946 -62.53955 49.98983

64.27341 -62.9289 50.54152

64.06603 -63.3002 51.07235

63.86714 -63.65377 51.5828

63.67667 -63.99055 52.07301

63.49435 -64.31089 52.54361

63.32001 -64.61562 52.99482

63.15346 -64.90536 53.42717

62.99442 -65.18059 53.84116

62.8427 -65.44199 54.2373

62.69813 -65.69028 54.61602

62.56039 -65.92576 54.978

62.42926 -66.14915 55.32366

62.30449 -66.36098 55.65357

62.18584 -66.56181 55.9683

62.07309 -66.75211 56.26836

61.96599 -66.9324 56.55434

61.86433 -67.10318 56.82677

61.76784 -67.26489 57.08615

61.6763 -67.41797 57.33299

61.58952 -67.56272 57.56793

61.50726 -67.69978 57.79132

61.42931 -67.82943 58.0037

61.35544 -67.95208 58.20558

61.28554 -68.06792 58.39747

61.21934 -68.17757 58.57967

61.15667 -68.28113 58.75276

61.09737 -68.37912 58.91706

61.04126 -68.47179 59.07299

60.98828 -68.55919 59.22112

60.93819 -68.6419 59.36161

60.89125 -68.71978 59.49513

60.84731 -68.79317 59.62194

60.807 -68.86183 59.74275

60.77275 -68.92419 59.8587

60.74391 -68.98003 59.97013

60.72154 -69.02833 60.07783

60.70622 -69.06846 60.18228

60.70251 -69.09618 60.28527

60.70415 -69.11741 60.3838

60.71513 -69.12821 60.47878

60.7295 -69.13432 60.56834

60.75018 -69.13271 60.65263

60.77234 -69.12841 60.7315

60.79909 -69.11799 60.80453

60.82547 -69.10698 60.87294

60.85555 -69.09086 60.93514

60.88567 -69.0742 60.99306

60.91517 -69.05643 61.0465

60.94626 -69.03645 61.0948

60.9768 -69.01685 61.13965

61.00603 -68.99691 61.1811

61.03621 -68.97569 61.2179

61.06551 -68.95476 61.25179

61.0928 -68.93544 61.2844

61.12096 -68.91451 61.31204

61.14808 -68.89413 61.33746

61.17418 -68.87432 61.36082

61.19587 -68.85963 61.39026

61.22081 -68.83992 61.40825

61.24472 -68.82092 61.42456

61.26762 -68.80257 61.43938

61.28955 -68.78491 61.45286

61.31055 -68.76791 61.46514

61.33062 -68.75155 61.47634

61.34981 -68.73579 61.48656

61.36818 -68.72066 61.4959

61.38573 -68.70608 61.50445

61.40251 -68.69211 61.51229

61.41855 -68.67868 61.51949

61.4339 -68.66577 61.52607

61.44857 -68.65335 61.53213

61.46262 -68.64143 61.5377

61.47606 -68.62997 61.54284

61.48893 -68.61895 61.54755

61.50126 -68.60837 61.55192

61.51307 -68.59815 61.55593

61.52439 -68.58833 61.55965

61.53526 -68.5789 61.56309

61.54568 -68.56981 61.56627

61.55569 -68.56103 61.56922

61.56531 -68.55259 61.57195

61.57455 -68.54443 61.57448

61.58345 -68.53657 61.57682

61.59202 -68.52896 61.57901

61.60028 -68.52161 61.58103

61.60823 -68.5145 61.58292

61.61591 -68.50764 61.58467

61.62333 -68.50098 61.58631

61.63049 -68.49453 61.58783

61.63743 -68.48827 61.58926

# section 5

XYZ

240

90.22175 -2.069101 -1.115859

90.22154 -2.078942 -1.114341

90.22131 -2.088974 -1.11215

90.22103 -2.09918 -1.109239

90.22079 -2.109526 -1.105561

90.2206 -2.120005 -1.101044

90.22055 -2.13055 -1.095605

90.22052 -2.141482 -1.089933

90.22072 -2.152681 -1.083744

90.22095 -2.164308 -1.07728

90.22112 -2.176433 -1.070595

90.22158 -2.188992 -1.063531

90.22207 -2.202076 -1.056166

90.22263 -2.215717 -1.048481

90.22322 -2.229948 -1.040459

90.22375 -2.244817 -1.032093

90.22451 -2.260335 -1.023331

90.22529 -2.276558 -1.01417

90.22609 -2.293529 -1.004585

90.22693 -2.311292 -0.9945525

90.22779 -2.329898 -0.9840494

90.22871 -2.349391 -0.9730392

90.22967 -2.369827 -0.9614977

90.23064 -2.391264 -0.9493936

90.23172 -2.413759 -0.9366901

90.2328 -2.437381 -0.9233615

90.23393 -2.462192 -0.9093642

90.23512 -2.488265 -0.8946589

90.23639 -2.51567 -0.8792003

90.23767 -2.544496 -0.862954

90.239 -2.57482 -0.8458665

90.24043 -2.606728 -0.8278846

90.24189 -2.640325 -0.8089674

90.24342 -2.675702 -0.7890519

90.24503 -2.712961 -0.7680757

90.24671 -2.752224 -0.7459896

90.24843 -2.793601 -0.7227205

90.25027 -2.837213 -0.6981951

90.25219 -2.883203 -0.6723547

90.25417 -2.931702 -0.6451132

90.25627 -2.982853 -0.6163869

90.25841 -3.036821 -0.5861001

90.26068 -3.093757 -0.5541509

90.26299 -3.153847 -0.5204571

90.26542 -3.217259 -0.4849048

90.26789 -3.284201 -0.4474044

90.27044 -3.354856 -0.4078207

90.27309 -3.429467 -0.3660801

90.27584 -3.508229 -0.3220153

90.27863 -3.5914 -0.2755221

90.28157 -3.679212 -0.2264448

90.28455 -3.77194 -0.17465

90.28767 -3.869853 -0.119981

90.29079 -3.973252 -0.062290851

90.29402 -4.082433 -0.0014036342

90.2973 -4.19772 0.062854625

90.30054 -4.319449 0.1306679

90.3038 -4.447966 0.2022379

90.30702 -4.583644 0.2777639

90.31026 -4.726871 0.357455

90.3134 -4.878062 0.4415255

90.31655 -5.037627 0.5302188

90.31964 -5.20601 0.6237783

90.3225 -5.383669 0.7224634

90.32511 -5.57108 0.8265438

90.32746 -5.768744 0.9362956

90.32948 -5.977179 1.052006

90.33112 -6.19693 1.173976

90.33241 -6.428546 1.302526

90.33316 -6.672602 1.437985

90.33323 -6.929691 1.580697

90.33244 -7.200419 1.731015

90.33086 -7.485423 1.889306

90.32817 -7.785338 2.055964

90.3244 -8.100827 2.231382

90.31933 -8.432561 2.41597

90.31261 -8.781217 2.610152

90.30408 -9.147479 2.814363

90.29377 -9.532069 3.029037

90.28117 -9.935652 3.254683

90.26613 -10.35895 3.49175

90.24841 -10.80266 3.740727

90.22772 -11.26747 4.002091

90.20337 -11.75402 4.276418

90.17518 -12.26299 4.564184

90.14291 -12.79503 4.865901

90.10593 -13.35071 5.182141

90.06366 -13.93055 5.513504

90.01534 -14.53496 5.860662

89.96131 -15.16463 6.223947

89.90038 -15.81978 6.604089

89.83228 -16.50091 7.001443

89.75643 -17.20833 7.41646

89.67229 -17.94228 7.849602

89.57913 -18.70287 8.301327

89.47624 -19.49014 8.77207

89.36295 -20.30401 9.262214

89.23852 -21.14432 9.772086

89.10241 -22.01083 10.30199

88.95393 -22.90311 10.85218

88.7924 -23.82064 11.42285

88.6171 -24.76277 12.0141

88.42735 -25.72867 12.62601

88.2226 -26.71744 13.25855

88.00227 -27.72799 13.91164

87.76594 -28.75916 14.58507

87.51311 -29.80959 15.27858

87.24339 -30.87784 15.9918

86.9565 -31.9623 16.72424

86.65228 -33.06128 17.47536

86.33054 -34.17299 18.24447

85.99242 -35.29622 19.03031

85.63542 -36.42741 19.83306

85.26122 -37.56538 20.65117

84.87005 -38.70797 21.48357

84.46227 -39.85306 22.32907

84.03843 -40.99844 23.18642

83.59896 -42.14182 24.05431

83.14448 -43.28091 24.93143

82.67619 -44.41372 25.81631

82.19533 -45.53841 26.70727

81.70274 -46.65294 27.60262

81.19836 -47.75426 28.50135

80.68317 -48.8401 29.40212

80.16112 -49.911 30.30227

79.63514 -50.96663 31.19973

79.10552 -52.00383 32.09408

78.57064 -53.01581 32.98787

78.03571 -54.00257 33.88032

77.50209 -54.96196 34.77088

76.97075 -55.89385 35.65683

76.44224 -56.79624 36.53743

75.9189 -57.67105 37.4093

75.40102 -58.51659 38.27175

74.8903 -59.33424 39.12219

74.38709 -60.12285 39.9599

73.89243 -60.88326 40.783

73.40725 -61.61555 41.59051

72.9321 -62.32001 42.38126

72.46749 -62.99674 43.15446

72.0142 -63.64671 43.90908

71.57251 -64.27003 44.64451

71.1428 -64.86741 45.36016

70.72534 -65.43937 46.05557

70.32036 -65.98626 46.73056

69.9282 -66.50932 47.38457

69.54886 -67.00903 48.01754

69.18232 -67.48586 48.62957

68.82877 -67.94086 49.22051

68.48805 -68.37467 49.7905

68.15997 -68.78777 50.3398

67.84456 -69.18132 50.86844

67.54149 -69.55566 51.37693

67.25074 -69.9119 51.86536

66.97192 -70.25041 52.33434

66.70484 -70.57211 52.78414

66.44925 -70.87778 53.21517

66.20477 -71.16787 53.62803

65.97115 -71.44317 54.02317

65.74815 -71.70449 54.40099

65.53532 -71.95213 54.76221

65.33235 -72.18692 55.10722

65.13892 -72.40939 55.43659

64.95467 -72.62022 55.75085

64.7793 -72.8199 56.05053

64.61245 -73.00898 56.33619

64.45382 -73.18802 56.60837

64.30301 -73.3575 56.86756

64.15972 -73.51786 57.11427

64.02365 -73.66945 57.34915

63.89449 -73.81297 57.57251

63.77192 -73.94869 57.78491

63.65561 -74.07707 57.98683

63.54533 -74.19827 58.17884

63.44077 -74.31298 58.36116

63.34163 -74.42132 58.53442

63.24771 -74.52384 58.69889

63.15871 -74.6208 58.855

63.07445 -74.71225 59.00333

62.99463 -74.79887 59.14397

62.91919 -74.88061 59.27758

62.84785 -74.95795 59.40435

62.78065 -75.03106 59.52481

62.71786 -75.10005 59.63961

62.66013 -75.16386 59.7497

62.6084 -75.22163 59.85599

62.56346 -75.27254 59.95911

62.52915 -75.3131 60.06106

62.50103 -75.34744 60.15924

62.48254 -75.37222 60.25518

62.46925 -75.39169 60.34698

62.46412 -75.40294 60.43577

62.46266 -75.41041 60.52007

62.4687 -75.41032 60.60095

62.47601 -75.40881 60.67719

62.4905 -75.40026 60.7492

62.50702 -75.38985 60.81675

62.5239 -75.37837 60.87994

62.54526 -75.36278 60.93825

62.56749 -75.3466 60.99242

62.58881 -75.33041 61.04319

62.61348 -75.31136 61.0888

62.63815 -75.29216 61.13097

62.66064 -75.27475 61.1714

62.68617 -75.25454 61.20617

62.71119 -75.23463 61.23819

62.73563 -75.21512 61.26768

62.75261 -75.20222 61.30466

62.77749 -75.18207 61.32747

62.80154 -75.16257 61.34819

62.82473 -75.1437 61.36706

62.84706 -75.1255 61.38423

62.86859 -75.10794 61.3999

62.88928 -75.09102 61.41419

62.90916 -75.0747 61.42725

62.92828 -75.05901 61.4392

62.94662 -75.04387 61.45013

62.96424 -75.02936 61.46016

62.98114 -75.01539 61.46936

62.99737 -75.00195 61.47779

63.01294 -74.98903 61.48555

63.02789 -74.9766 61.49268

63.04223 -74.96466 61.49926

63.05601 -74.95319 61.50531

63.06923 -74.94215 61.51092

63.08194 -74.9315 61.51609

63.09414 -74.92126 61.52086

63.10588 -74.91142 61.52529

63.11715 -74.90195 61.5294

63.12801 -74.89281 61.53321

63.13845 -74.884 61.53674

63.14851 -74.8755 61.54004

63.1582 -74.86732 61.54309

63.16755 -74.85939 61.54595

63.17657 -74.85176 61.5486

63.18528 -74.84435 61.55109

63.19368 -74.8372 61.55341

63.20182 -74.83028 61.55558

63.20968 -74.82358 61.55761

63.21729 -74.81709 61.55953

# section 6

XYZ

240

101.9561 -1.664808 -1.087105

101.9559 -1.675441 -1.085417

101.9557 -1.686295 -1.08304

101.9555 -1.697375 -1.079983

101.9552 -1.708682 -1.076267

101.955 -1.72022 -1.071829

101.9548 -1.731975 -1.066678

101.9546 -1.744173 -1.061317

101.9545 -1.756754 -1.05555

101.9543 -1.769828 -1.049537

101.9542 -1.783443 -1.043298

101.9541 -1.797592 -1.036751

101.954 -1.812333 -1.029924

101.9539 -1.827703 -1.022799

101.9538 -1.843738 -1.01536

101.9537 -1.860489 -1.007603

101.9536 -1.877976 -0.9994719

101.9535 -1.896257 -0.990967

101.9535 -1.915378 -0.9820667

101.9533 -1.935392 -0.9727474

101.9532 -1.956355 -0.9629944

101.9531 -1.978313 -0.9527565

101.953 -2.001331 -0.942021

101.9528 -2.025475 -0.9307583

101.9527 -2.050811 -0.9189419

101.9525 -2.077406 -0.9065249

101.9523 -2.105337 -0.8934792

101.9521 -2.134684 -0.8797676

101.9519 -2.165533 -0.8653571

101.9517 -2.197966 -0.8501872

101.9513 -2.23208 -0.8342245

101.9511 -2.26798 -0.8174315

101.9507 -2.305759 -0.7997335

101.9503 -2.345534 -0.7810925

101.9499 -2.387428 -0.7614622

101.9495 -2.431552 -0.7407568

101.949 -2.478044 -0.7189281

101.9484 -2.527047 -0.695922

101.9479 -2.578694 -0.6716343

101.9472 -2.633147 -0.6460127

101.9465 -2.690573 -0.6189857

101.9457 -2.751132 -0.5904454

101.9449 -2.815018 -0.5603309

101.9439 -2.882408 -0.528517

101.9429 -2.953518 -0.4949407

101.9416 -3.028541 -0.4594502

101.9403 -3.107711 -0.4219638

101.9388 -3.191276 -0.3823808

101.9372 -3.279472 -0.3405619

101.9353 -3.372551 -0.296353

101.9334 -3.470805 -0.2496574

101.9312 -3.574504 -0.2002803

101.9288 -3.683971 -0.148117

101.9262 -3.799511 -0.0929735

101.9233 -3.921468 -0.034705736

101.9201 -4.050189 0.026872491

101.9164 -4.186028 0.091980986

101.9124 -4.329382 0.160785

101.9079 -4.480654 0.2335023

101.9029 -4.640265 0.3103494

101.8974 -4.80865 0.3915812

101.8913 -4.986285 0.4773998

101.8847 -5.173638 0.5680783

101.8773 -5.371206 0.6638876

101.869 -5.579503 0.7651111

101.8598 -5.79907 0.8720421

101.8495 -6.030471 0.9849762

101.8382 -6.274282 1.104257

101.8258 -6.531127 1.230168

101.812 -6.801609 1.363084

101.7967 -7.08636 1.503365

101.7795 -7.386035 1.651386

101.7607 -7.701337 1.807506

101.7397 -8.032915 1.972205

101.7166 -8.381499 2.145867

101.6911 -8.747804 2.328926

101.6627 -9.132552 2.521828

101.6312 -9.536475 2.725033

101.5966 -9.960367 2.938974

101.5584 -10.40489 3.164263

101.5163 -10.87084 3.401331

101.47 -11.35897 3.650693

101.4192 -11.87002 3.912845

101.363 -12.40458 4.18845

101.3011 -12.96344 4.477961

101.2334 -13.54729 4.781924

101.1589 -14.15668 5.10097

101.0771 -14.79216 5.435731

100.9871 -15.45415 5.786911

100.8892 -16.14346 6.154719

100.7819 -16.8603 6.539903

100.665 -17.60523 6.942705

100.5378 -18.37862 7.363504

100.3996 -19.18074 7.802728

100.2496 -20.01168 8.260811

100.087 -20.87144 8.738186

99.91089 -21.75994 9.235194

99.72057 -22.67701 9.752101

99.51534 -23.62234 10.28916

99.29446 -24.5955 10.84659

99.05711 -25.59589 11.42449

98.80248 -26.6228 12.02291

98.52979 -27.67532 12.64184

98.23838 -28.75243 13.28118

97.92769 -29.85298 13.94077

97.59718 -30.97567 14.62036

97.24633 -32.11901 15.31957

96.87469 -33.28142 16.03795

96.48199 -34.46114 16.77494

96.06802 -35.65633 17.52991

95.63267 -36.86498 18.3021

95.17725 -38.0858 19.09027

94.6989 -39.3149 19.89432

94.19967 -40.55094 20.71277

93.67977 -41.79158 21.54447

93.13975 -43.03447 22.38819

92.58026 -44.27718 23.24265

92.00184 -45.51715 24.10653

91.40518 -46.75185 24.97845

90.79183 -47.9792 25.85688

90.16338 -49.19724 26.74014

89.52088 -50.40358 27.62666

88.8642 -51.59491 28.51531

88.19457 -52.7688 29.40469

87.51678 -53.92585 30.29248

86.83447 -55.06581 31.17679

86.14782 -56.18541 32.05711

85.4543 -57.27772 32.9352

84.75982 -58.34357 33.81001

84.06568 -59.38042 34.68136

83.37346 -60.38743 35.54745

82.68379 -61.36242 36.4076

81.99988 -62.3074 37.25872

81.3221 -63.22039 38.10028

80.65282 -64.10284 38.92986

79.99246 -64.95332 39.74694

79.34267 -65.77275 40.54981

78.70454 -66.56119 41.33749

78.07892 -67.31892 42.10896

77.46657 -68.04604 42.86352

76.86853 -68.74363 43.60012

76.28529 -69.41177 44.31828

75.71738 -70.05127 45.01742

75.16527 -70.66273 45.69707

74.62921 -71.24657 46.35711

74.10978 -71.80421 46.99692

73.60706 -72.33617 47.6165

73.12096 -72.84299 48.21592

72.65182 -73.32594 48.79494

72.19943 -73.78572 49.35374

71.76365 -74.22286 49.89258

71.34451 -74.63873 50.41146

70.9416 -75.03369 50.91085

70.55489 -75.40903 51.3908

70.18391 -75.76514 51.8519

69.82841 -76.10311 52.29438

69.48812 -76.42378 52.71865

69.16253 -76.72769 53.12529

68.85133 -77.01573 53.51466

68.55415 -77.2888 53.88718

68.27048 -77.54724 54.24352

67.99989 -77.79194 54.58408

67.74193 -78.02352 54.90939

67.49619 -78.24274 55.21993

67.26224 -78.45016 55.51621

67.0396 -78.64635 55.79877

66.82788 -78.83193 56.06812

66.62658 -79.00742 56.32474

66.43529 -79.17334 56.56915

66.25359 -79.33001 56.80195

66.08109 -79.47823 57.02344

65.91737 -79.61829 57.23414

65.76199 -79.75066 57.43454

65.61463 -79.8755 57.62522

65.47491 -79.99361 57.80634

65.34241 -80.10507 57.97855

65.21684 -80.21048 58.14207

65.09785 -80.31013 58.29732

64.98516 -80.40405 58.4449

64.87836 -80.49299 58.58486

64.77728 -80.57687 58.71783

64.68159 -80.6562 58.84399

64.59109 -80.73115 58.96378

64.50572 -80.80186 59.07767

64.42554 -80.86813 59.18623

64.35073 -80.9298 59.28996

64.28143 -80.98671 59.38936

64.21918 -81.03743 59.48573

64.16262 -81.08331 59.57859

64.11373 -81.12247 59.66964

64.07128 -81.15631 59.75821

64.0377 -81.18248 59.84637

64.00996 -81.20396 59.93154

63.99228 -81.21694 60.01662

63.97765 -81.22756 60.09732

63.97379 -81.22935 60.17682

63.97398 -81.22802 60.25233

63.97605 -81.22511 60.32324

63.9856 -81.21623 60.39041

63.99751 -81.20573 60.45332

64.00933 -81.19516 60.51217

64.02709 -81.18 60.56612

64.04587 -81.16412 60.61618

64.0623 -81.15015 60.66397

64.08434 -81.13186 60.70568

64.10648 -81.11354 60.74412

64.12861 -81.09528 60.77954

64.1396 -81.08571 60.82407

64.16413 -81.06569 60.85145

64.18806 -81.04625 60.87639

64.21127 -81.02735 60.89914

64.23382 -81.00906 60.91986

64.25568 -80.99134 60.93877

64.2768 -80.97423 60.95601

64.29723 -80.95767 60.97174

64.31696 -80.9417 60.98611

64.33599 -80.92628 60.99925

64.35432 -80.91145 61.01125

64.37199 -80.89717 61.02225

64.38905 -80.8834 61.03228

64.40543 -80.87015 61.04149

64.42121 -80.85738 61.04993

64.43641 -80.84512 61.05769

64.45105 -80.8333 61.0648

64.46513 -80.82193 61.07135

64.4787 -80.81097 61.07737

64.49175 -80.80041 61.08291

64.50431 -80.79027 61.08802

64.51643 -80.78049 61.09275

64.52809 -80.77105 61.09711

64.53935 -80.76198 61.10114

64.55019 -80.7532 61.10487

64.56067 -80.74476 61.10834

64.57078 -80.73658 61.11155

64.58055 -80.72869 61.11452

64.58999 -80.72105 61.11729

64.59911 -80.71368 61.11987

64.60794 -80.70655 61.12226

64.61649 -80.69964 61.12452

64.62477 -80.69294 61.12661

# section 7

XYZ

240

111.5189 -1.335334 -1.063672

111.5187 -1.346613 -1.061845

111.5186 -1.358136 -1.059318

111.5183 -1.369928 -1.056141

111.5181 -1.382017 -1.052394

111.5179 -1.394419 -1.048021

111.5176 -1.407161 -1.043105

111.5172 -1.42039 -1.037998

111.5168 -1.434098 -1.032572

111.5163 -1.448351 -1.026928

111.5159 -1.463181 -1.021054

111.5154 -1.478625 -1.014928

111.5148 -1.494717 -1.008539

111.5142 -1.511495 -1.00187

111.5135 -1.529001 -0.9949053

111.5129 -1.547284 -0.9876458

111.5122 -1.566376 -0.980028

111.5114 -1.586333 -0.9720584

111.5106 -1.607208 -0.9637155

111.5097 -1.629055 -0.9549775

111.5088 -1.65194 -0.9458359

111.5078 -1.675906 -0.9362274

111.5068 -1.701029 -0.9261488

111.5057 -1.727378 -0.9155718

111.5046 -1.75503 -0.9044783

111.5034 -1.784048 -0.8928041

111.5021 -1.814522 -0.880534

111.5008 -1.846537 -0.8676323

111.4994 -1.880193 -0.8540757

111.4979 -1.915565 -0.8397831

111.4962 -1.952768 -0.824737

111.4945 -1.99192 -0.8089132

111.4927 -2.033107 -0.7922086

111.4908 -2.076468 -0.7746062

111.4887 -2.122138 -0.7560727

111.4865 -2.170224 -0.7364925

111.4842 -2.220885 -0.7158376

111.4818 -2.274281 -0.6940697

111.4791 -2.330538 -0.6710474

111.4763 -2.389843 -0.6467458

111.4734 -2.452382 -0.6211036

111.4702 -2.518313 -0.5939866

111.4668 -2.587862 -0.5653673

111.4632 -2.661201 -0.5350854

111.4593 -2.738585 -0.5031194

111.455 -2.820194 -0.4692669

111.4505 -2.906304 -0.4334896

111.4457 -2.997165 -0.395665

111.4405 -3.093048 -0.3556764

111.4349 -3.194202 -0.3133289

111.4289 -3.300967 -0.2685743

111.4225 -3.413606 -0.2211675

111.4157 -3.53249 -0.1710461

111.4083 -3.657923 -0.1179781

111.4005 -3.790292 -0.061844952

111.392 -3.929962 -0.0024508031

111.3827 -4.077298 0.060453482

111.3727 -4.232743 0.1270033

111.3619 -4.396723 0.1974317

111.3502 -4.569687 0.2719611

111.3376 -4.752085 0.3508797

111.3241 -4.944444 0.4343554

111.3096 -5.147258 0.5226863

111.2938 -5.361051 0.6161518

111.2766 -5.586369 0.7150473

111.2579 -5.823784 0.8196795

111.2377 -6.073903 0.9303512

111.2158 -6.337319 1.04744

111.1922 -6.614725 1.171201

111.1666 -6.906741 1.302044

111.1387 -7.214036 1.440344

111.1083 -7.537302 1.586492

111.0753 -7.877295 1.740845

111.0394 -8.234676 1.903946

111.0006 -8.61023 2.076178

110.9584 -9.004709 2.257991

110.9123 -9.41887 2.449851

110.8621 -9.853485 2.652235

110.8078 -10.30941 2.865579

110.7487 -10.7873 3.090576

110.6845 -11.28801 3.327645

110.6149 -11.81234 3.577321

110.5396 -12.36105 3.840115

110.4574 -12.93475 4.116762

110.3681 -13.53427 4.407694

110.2714 -14.16033 4.713488

110.1664 -14.8135 5.034821

110.0525 -15.49433 5.372351

109.9285 -16.20324 5.72681

109.7947 -16.94115 6.098304

109.6497 -17.70825 6.487596

109.493 -18.50518 6.894837

109.3239 -19.33235 7.32035

109.1417 -20.19001 7.764528

108.9454 -21.07829 8.227795

108.7341 -21.99713 8.710574

108.5068 -22.94644 9.213177

108.2628 -23.92605 9.735816

108.0013 -24.93563 10.27871

107.7214 -25.9747 10.84203

107.4223 -27.04263 11.42582

107.103 -28.13861 12.03008

106.7627 -29.26172 12.65473

106.4007 -30.41084 13.29962

106.0163 -31.58473 13.96452

105.6091 -32.78199 14.64911

105.1783 -34.00106 15.35297

104.7236 -35.2402 16.07556

104.2447 -36.49755 16.81626

103.7413 -37.77113 17.57438

103.2134 -39.0588 18.34908

102.6623 -40.35915 19.13913

102.0851 -41.66802 19.94425

101.484 -42.984 20.76298

100.8592 -44.30454 21.59411

100.2114 -45.62714 22.43638

99.54135 -46.94916 23.28848

98.84969 -48.26785 24.14908

98.13718 -49.58046 25.01677

97.40562 -50.88488 25.88994

96.65686 -52.17897 26.76693

95.8922 -53.46014 27.64625

95.11143 -54.72484 28.52669

94.31592 -55.97045 29.40679

93.51125 -57.19772 30.2845

92.7015 -58.40642 31.15811

91.88689 -59.59314 32.02697

91.06407 -60.75093 32.89227

90.23958 -61.88124 33.75272

89.41464 -62.98122 34.60841

88.5913 -64.04945 35.45831

87.77029 -65.08358 36.30182

86.95552 -66.08575 37.13602

86.14743 -67.05372 37.96054

85.34894 -67.98897 38.77312

84.5605 -68.88985 39.5734

83.7843 -69.75739 40.35978

83.02151 -70.59161 41.1313

82.27328 -71.39275 41.88706

81.54052 -72.16094 42.62643

80.82452 -72.89732 43.34835

80.12593 -73.60199 44.05243

79.4454 -74.2758 44.73811

78.78354 -74.91949 45.40494

78.14067 -75.53342 46.05278

77.51753 -76.11925 46.68102

76.91424 -76.67751 47.28968

76.33074 -77.20876 47.87881

75.76737 -77.71449 48.44814

75.224 -78.19542 48.99781

74.70044 -78.65215 49.52814

74.19678 -79.08622 50.03906

73.71249 -79.49797 50.53102

73.24757 -79.88887 51.00406

72.80148 -80.25934 51.45874

72.37395 -80.61056 51.89527

71.96464 -80.94345 52.31401

71.57294 -81.25862 52.71558

71.1985 -81.55704 53.10027

70.8409 -81.83968 53.46845

70.49949 -82.10693 53.82082

70.17377 -82.35971 54.15777

69.86324 -82.59872 54.47977

69.56738 -82.82476 54.78727

69.28568 -83.03848 55.08078

69.0176 -83.24048 55.36081

68.7626 -83.43139 55.62785

68.52016 -83.61179 55.88238

68.28974 -83.78222 56.1249

68.07085 -83.94303 56.35603

67.86305 -84.09509 56.57598

67.6658 -84.23869 56.7853

67.47858 -84.37432 56.98446

67.30101 -84.50211 57.17406

67.13262 -84.62299 57.35421

66.97294 -84.73699 57.52555

66.82159 -84.84476 57.6883

66.67815 -84.94662 57.84285

66.54227 -85.04253 57.98983

66.41349 -85.13338 58.12921

66.29153 -85.219 58.26168

66.17597 -85.29993 58.38734

66.06651 -85.37639 58.50658

65.96273 -85.44849 58.61974

65.86427 -85.51678 58.72704

65.77063 -85.58164 58.82868

65.68149 -85.64342 58.92505

65.59645 -85.70242 59.01689

65.51673 -85.75771 59.10539

65.44307 -85.8086 59.19247

65.37684 -85.85413 59.2784

65.32009 -85.89248 59.36604

65.27091 -85.92536 59.45193

65.23391 -85.94901 59.54042

65.20142 -85.96951 59.62478

65.18258 -85.97974 59.71037

65.16946 -85.98579 59.79238

65.15947 -85.98985 59.86956

65.1594 -85.98646 59.94395

65.16289 -85.98058 60.01398

65.16697 -85.97457 60.07943

65.1791 -85.9626 60.14017

65.19307 -85.94943 60.19667

65.20458 -85.93826 60.25046

65.22375 -85.92155 60.29781

65.24356 -85.9045 60.34148

65.26381 -85.88727 60.38176

65.26992 -85.88042 60.43242

65.29417 -85.86052 60.46353

65.31799 -85.84111 60.49192

65.34125 -85.82219 60.51783

65.36395 -85.80383 60.54144

65.38608 -85.78597 60.56298

65.40757 -85.7687 60.58262

65.42843 -85.75195 60.60054

65.44866 -85.73576 60.61689

65.46825 -85.7201 60.63181

65.48717 -85.70502 60.64543

65.50547 -85.69048 60.65788

65.52317 -85.67644 60.66922

65.54023 -85.66291 60.67962

65.5567 -85.64987 60.68913

65.5726 -85.63734 60.69784

65.58793 -85.62524 60.70581

65.60271 -85.6136 60.71314

65.61697 -85.60238 60.71985

65.63071 -85.59158 60.72601

65.64397 -85.58118 60.73168

65.65675 -85.57116 60.73691

65.6691 -85.56149 60.74172

65.681 -85.55217 60.74616

65.69249 -85.5432 60.75025

65.7036 -85.53452 60.75404

65.71433 -85.52615 60.75753

65.72471 -85.51805 60.76077

65.73474 -85.51024 60.76377

65.74445 -85.50268 60.76656

65.75385 -85.49537 60.76915

65.76296 -85.48827 60.77157

65.77178 -85.48142 60.77382

# section 8

XYZ

240

118.5829 -1.09196 -1.046361

118.5828 -1.103712 -1.044429

118.5826 -1.115734 -1.041796

118.5824 -1.12805 -1.038532

118.5821 -1.140719 -1.034759

118.5818 -1.15376 -1.030438

118.5816 -1.167224 -1.025689

118.5807 -1.181218 -1.020774

118.5803 -1.195755 -1.015602

118.5798 -1.210882 -1.010229

118.5789 -1.226604 -1.004618

118.5783 -1.243012 -0.9988062

118.5771 -1.260103 -0.9927413

118.576 -1.277919 -0.9864089

118.5754 -1.296507 -0.9797941

118.5741 -1.315924 -0.9729023

118.5728 -1.336203 -0.9656648

118.5715 -1.357402 -0.9580926

118.5701 -1.379572 -0.950161

118.5686 -1.40277 -0.9418519

118.5673 -1.427074 -0.9331607

118.5657 -1.452522 -0.9240162

118.5642 -1.479198 -0.9144228

118.5624 -1.507179 -0.9043533

118.5603 -1.536544 -0.8937933

118.5585 -1.567347 -0.8826698

118.5566 -1.599701 -0.8709727

118.5541 -1.633687 -0.8586665

118.5518 -1.669411 -0.8457434

118.5495 -1.706965 -0.8320984

118.5469 -1.746441 -0.8177299

118.5441 -1.787998 -0.8026195

118.5411 -1.831705 -0.7866497

118.5382 -1.877705 -0.7698165

118.5348 -1.926177 -0.7520924

118.5315 -1.977185 -0.7333432

118.5275 -2.030925 -0.7135546

118.5241 -2.08757 -0.6927007

118.5196 -2.147228 -0.6706144

118.5151 -2.210119 -0.647288

118.5107 -2.276433 -0.6226691

118.5056 -2.346339 -0.5966021

118.5007 -2.420065 -0.5690891

118.4948 -2.497798 -0.5399362

118.4887 -2.579818 -0.5091597

118.4821 -2.666291 -0.4765184

118.4754 -2.757527 -0.4420032

118.4684 -2.853774 -0.4054777

118.4602 -2.955346 -0.3668403

118.452 -3.062463 -0.3258685

118.4432 -3.175509 -0.2825484

118.4333 -3.294748 -0.2365967

118.4233 -3.420591 -0.1879836

118.4126 -3.553336 -0.1364486

118.4011 -3.693404 -0.081891857

118.3889 -3.841156 -0.024111532

118.3751 -3.996994 0.037164729

118.3606 -4.161364 0.1020497

118.3455 -4.334721 0.1707864

118.3287 -4.517551 0.2436035

118.3111 -4.710305 0.320814

118.292 -4.913546 0.4025582

118.2717 -5.127769 0.4891569

118.2496 -5.35356 0.5808913

118.2258 -5.591442 0.6780673

118.1999 -5.842047 0.7809989

118.1724 -6.105988 0.8899993

118.1427 -6.38389 1.00547

118.1108 -6.676483 1.127646

118.0768 -6.984388 1.256951

118.0392 -7.308335 1.393791

117.9993 -7.649027 1.538556

117.9558 -8.007283 1.691604

117.9091 -8.383728 1.853525

117.8586 -8.779169 2.024705

117.8039 -9.194489 2.205594

117.7447 -9.630355 2.396682

117.6809 -10.08764 2.598457

117.612 -10.56721 2.811363

117.5374 -11.06974 3.036148

117.4569 -11.59614 3.273217

117.3701 -12.14726 3.523121

117.2768 -12.72377 3.786387

117.1755 -13.32637 4.063818

117.0656 -13.95591 4.355801

116.9475 -14.61317 4.662929

116.8202 -15.29868 4.985971

116.6822 -16.01302 5.325534

116.5334 -16.75651 5.682409

116.3729 -17.53038 6.056631

116.2004 -18.33458 6.448965

116.0141 -19.16999 6.859464

115.8142 -20.0369 7.288474

115.5994 -20.93558 7.736324

115.3689 -21.86612 8.203379

115.1213 -22.82863 8.690204

114.8567 -23.82289 9.196936

114.5729 -24.84869 9.72378

114.2698 -25.9057 10.27101

113.9462 -26.99347 10.83867

113.6013 -28.11124 11.4268

113.2343 -29.25829 12.0354

112.8443 -30.43362 12.66425

112.43 -31.63588 13.31326

111.9915 -32.86396 13.98208

111.5272 -34.11636 14.67032

111.0377 -35.39143 15.37767

110.5215 -36.68714 16.1034

109.9787 -38.00186 16.84677

109.4097 -39.33337 17.60726

108.8129 -40.67927 18.38378

108.1915 -42.03844 19.17524

107.5413 -43.40633 19.98119

106.8648 -44.7814 20.80007

106.1626 -46.16072 21.63078

105.4352 -47.54234 22.47194

104.6835 -48.9229 23.32234

103.908 -50.29981 24.18056

103.1103 -51.66985 25.04505

102.2913 -53.0313 25.9143

101.4536 -54.38142 26.78667

100.5989 -55.71803 27.66068

99.72626 -57.03676 28.53509

98.83765 -58.33544 29.40833

97.93908 -59.61457 30.27862

97.03528 -60.87396 31.14426

96.12613 -62.1105 32.00483

95.20802 -63.31644 32.86063

94.28735 -64.49438 33.71044

93.36597 -65.64104 34.55441

92.4457 -66.75452 35.39252

91.52744 -67.83242 36.22371

90.61629 -68.8766 37.04533

89.71188 -69.88535 37.85726

88.8178 -70.85984 38.65725

87.93474 -71.7977 39.44519

87.06552 -72.70103 40.21951

86.21041 -73.56887 40.97901

85.37153 -74.40199 41.72304

84.54967 -75.20033 42.45122

83.74682 -75.96571 43.16246

82.96315 -76.69732 43.85595

82.19921 -77.39632 44.53181

81.45625 -78.06408 45.18913

80.73438 -78.69986 45.828

80.03463 -79.30649 46.44758

79.35735 -79.88429 47.04836

78.70172 -80.43354 47.6297

78.06889 -80.95604 48.192

77.45828 -81.45259 48.73495

76.8698 -81.92386 49.25887

76.30347 -82.37134 49.76392

75.75923 -82.7954 50.25053

75.23666 -83.19804 50.71829

74.73513 -83.57915 51.16821

74.2544 -83.93993 51.60051

73.79411 -84.28221 52.01508

73.35369 -84.6053 52.41298

72.9323 -84.91154 52.79407

72.52994 -85.20145 53.15914

72.14596 -85.4749 53.50846

71.77937 -85.73373 53.84287

71.43019 -85.97839 54.16236

71.09735 -86.20943 54.46762

70.78043 -86.42772 54.75916

70.47871 -86.63407 55.03725

70.19178 -86.82887 55.30261

69.91911 -87.01275 55.5557

69.65961 -87.18651 55.79683

69.41331 -87.35067 56.02658

69.17919 -87.50543 56.24542

68.95731 -87.65185 56.45364

68.74655 -87.78971 56.65195

68.54662 -87.91978 56.84071

68.35695 -88.04279 57.02028

68.17758 -88.15849 57.19104

68.00676 -88.26801 57.353

67.84538 -88.37151 57.50723

67.69264 -88.46906 57.65366

67.54762 -88.56106 57.79251

67.41003 -88.64787 57.92468

67.27991 -88.73039 58.05005

67.15645 -88.80798 58.16875

67.03921 -88.88074 58.28135

66.92683 -88.95063 58.38781

66.81966 -89.01772 58.48803

66.71547 -89.08332 58.58216

66.61366 -89.14855 58.67063

66.51706 -89.21053 58.75581

66.42496 -89.27033 58.84006

66.34134 -89.32428 58.92403

66.2673 -89.37167 59.01114

66.20241 -89.41294 59.09759

66.15091 -89.44444 59.1886

66.10546 -89.47217 59.27575

66.07548 -89.48865 59.36581

66.05233 -89.5003 59.45258

66.03384 -89.50937 59.5345

66.02654 -89.51041 59.61422

66.02384 -89.50787 59.68956

66.02232 -89.50525 59.75978

66.03001 -89.4955 59.82555

66.04058 -89.48403 59.88682

66.04823 -89.47511 59.94507

66.06564 -89.4595 59.99661

66.08331 -89.4436 60.04396

66.1024 -89.42699 60.08786

66.10466 -89.42233 60.14302

66.12888 -89.40247 60.17691

66.15267 -89.38303 60.20783

66.17593 -89.36414 60.23622

66.19865 -89.34572 60.26183

66.22128 -89.32787 60.28533

66.24282 -89.31017 60.30689

66.2642 -89.29336 60.32625

66.2845 -89.27716 60.34424

66.30463 -89.26105 60.36031

66.32409 -89.2459 60.37529

66.34292 -89.23132 60.38863

66.36072 -89.21679 60.40107

66.37833 -89.20326 60.4123

66.39534 -89.19012 60.42265

66.4118 -89.17718 60.43193

66.42768 -89.16502 60.44072

66.44301 -89.15333 60.4486

66.45782 -89.14162 60.45587

66.4721 -89.13069 60.46234

66.48591 -89.12029 60.46854

66.49924 -89.10983 60.47407

66.51166 -89.10005 60.47918

66.52413 -89.09077 60.48389

66.53616 -89.08125 60.48827

66.54782 -89.07264 60.49232

66.55909 -89.06419 60.49609

66.57 -89.05605 60.49936

66.5806 -89.04784 60.50262

66.59038 -89.04025 60.50566

66.60031 -89.0329 60.50828

66.60995 -89.02577 60.51095

66.61884 -89.01843 60.51323

NI_END nibladegeometry

NI_END NIBlade

NI_END nirow

NI_END GEOMTURBO
