# Supplementary material for: Aerodynamic Optimization Design of a Supersonic Compressor Rotor with High Pressure Ratio
Source: Hindawi journal article supplement (doi:10.1155/2021/6664968), 2021-03-10
Supplement: f1 [file 6664968.f1.zip › Supplementary Description.docx]

**Supplementary Description**

The grid file of the Original rotor, which can be generated mesh through the IGG of Numeca software.
